# Supplementary material for: Additive-free oxychlorination of unsaturated C–C bonds with tert-butyl hypochlorite and water
Source: Royal Society of Chemistry journal article supplement (doi:10.1039/d4ob00003j), 2024-01-01
Supplement: d4ob00003j1.pdf [file d4ob00003j1.pdf]

## Electronic Supplementary Information

Additive-free Oxychlorination of Unsaturated C-C Bonds with *tert*-Butyl  
Hypochlorite and Water

Duyi Shen<sup>1,\*</sup> Chaoyue Sun,<sup>1</sup> Yun Han,<sup>1</sup> Zhen Luo,<sup>1</sup> Ting Ren,<sup>1</sup> Qin Zhang,<sup>1</sup> Wenting  
Huang,<sup>1</sup> Jianru Xie,<sup>1</sup> Ying Jia,<sup>1</sup> Mianran Chao<sup>1,\*</sup>

<sup>1</sup>Key Laboratory of Green Natural Products and Pharmaceutical Intermediates in  
Colleges and Universities of Shandong Province, School of Chemistry and Chemical  
Engineering, Qufu Normal University, P. R. China

\*Corresponding author:

Duyi Shen (E-mail: [shendy@qfnu.edu.cn](mailto:shendy@qfnu.edu.cn))

Mianran Chao (E-mail: [chaomr@qfnu.edu.cn](mailto:chaomr@qfnu.edu.cn))

### Table of Content

|                                                   |     |
|---------------------------------------------------|-----|
| <b>1. General Information</b> .....               | S2  |
| <b>2. Experimental Section</b> .....              | S3  |
| <b>3. GC-MS spectra</b> .....                     | S4  |
| <b>4. Characterization data of products</b> ..... | S6  |
| <b>5. NMR Spectra</b> .....                       | S25 |
| <b>6. References</b> .....                        | S79 |

## 1. General Information

$^1\text{H}$ -NMR and  $^{13}\text{C}$ -NMR were recorded on a BRUKER AVANCE at 500 and 126 MHz, respectively. Chemical shifts ( $\delta$ ) were reported referenced to an internal tetramethylsilane (TMS) standard or the  $\text{CDCl}_3$  residual peak ( $\delta$  7.26) for  $^1\text{H}$ -NMR. Chemical shifts of  $^{13}\text{C}$ -NMR were reported relative to  $\text{CDCl}_3$  ( $\delta$  77.0). Data were reported in the following order: chemical shift ( $\delta$ ) in ppm; multiplicities were indicated s (singlet), bs (broad singlet), d (doublet), t (triplet), m (multiplet); coupling constants ( $J$ ) were in Hz. MS were measured by Agilent 7890/7000D GC-MS (EI, 70 eV). Analytical thin-layer chromatography (TLC) was performed on silica gel and visualized with UV light. The purification of organic compounds was carried out by flash chromatography on silica gel (200–300 mesh). Unless otherwise stated, the substrates were prepared according to the literature methods and the products (except **b16**, **b22**, **d11**, **d13'**) were also known compounds and the characterization data were consistent with that of literature. Unless otherwise noted, other commercially available reagents and solvents with analytical grade were purchased from Macklin Inc. (P. R. China) and Energy Chemical (P. R. China) and used without further purification.

## 2. Experimental Section

**2.1 Typical experimental procedure for the reaction of alkynes:** alkyne (0.3 mmol) and a mixed solvent of acetone-water (v/v 9/1, 2 mL) were added into a clean glass tube (15 mL), followed by the addition of tBuOCl (4.0 equiv.). Then the mixture was continuously stirred at room temperature for desired time. The reaction was monitored by TLC under UV light. After completion, the reaction mixture was purified by chromatography column on silica gel with EtOAc/petroleum ether to get the desired products.

**2.2 Typical experimental procedure for the reaction of alkenes:** alkene (0.3 mmol) and a mixed solvent of acetone-water (v/v 9/1, 2 mL) were added into a clean glass tube (15 mL), followed by the addition of tBuOCl (2.2 equiv.). Then the mixture was continuously stirred at room temperature for desired time. The reaction was monitored by TLC under UV light. After completion, the reaction mixture was purified by chromatography column on silica gel with EtOAc/petroleum ether to get the desired products.

**2.3 Procedure for the  $^{18}\text{O}$ -labelling experiments of alkyne:** Follow the typical procedure described in section 2.1 except for the replacement of water by  $\text{H}_2^{18}\text{O}$ . After completion, the reaction mixture was injected into GC-MS for MS analysis.

**2.4 Procedure for the  $^{18}\text{O}$ -labelling experiments of alkene:** Follow the typical procedure described in section 2.2 except for the replacement of water by  $\text{H}_2^{18}\text{O}$ . After completion, the reaction mixture was injected into GC-MS for MS analysis.

### 3. GC-MS spectra

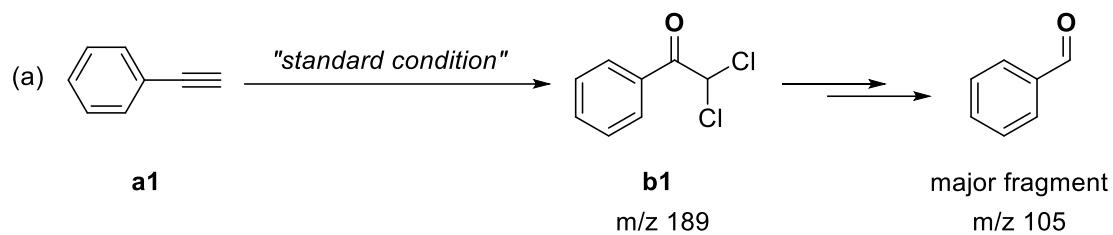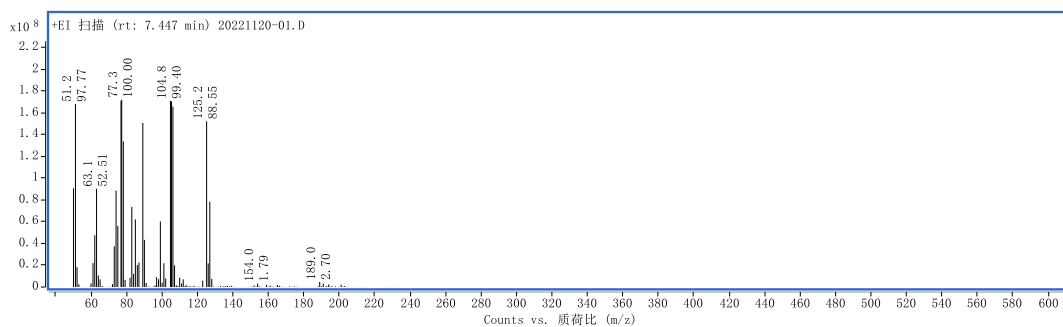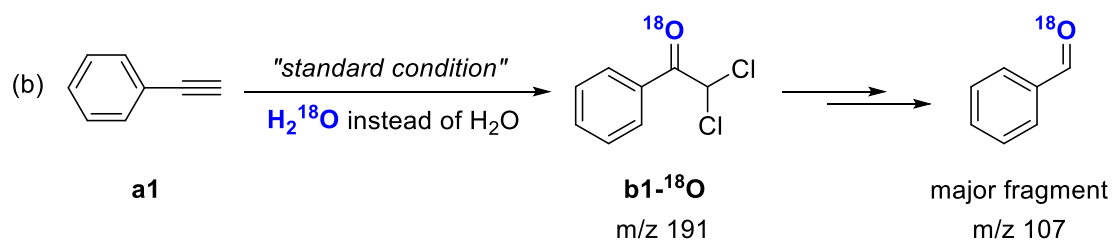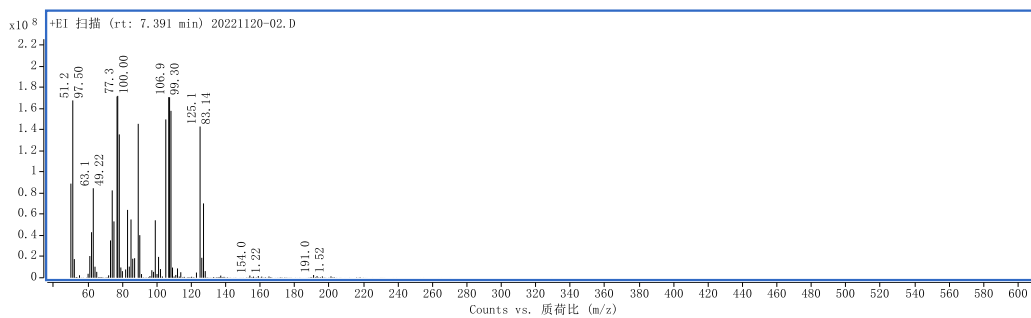

**Scheme S1.** The GC-MS spectra of the (a) blank reaction and (b) <sup>18</sup>O-labelling experiments of ethynylbenzene **a1**.



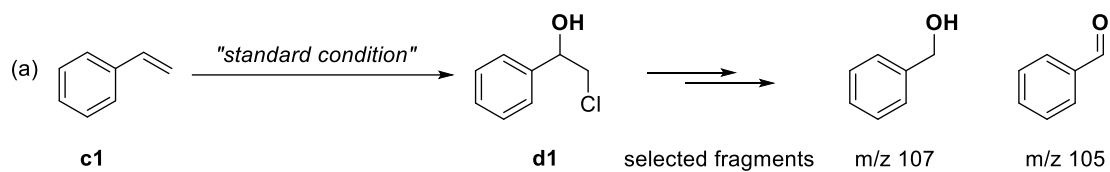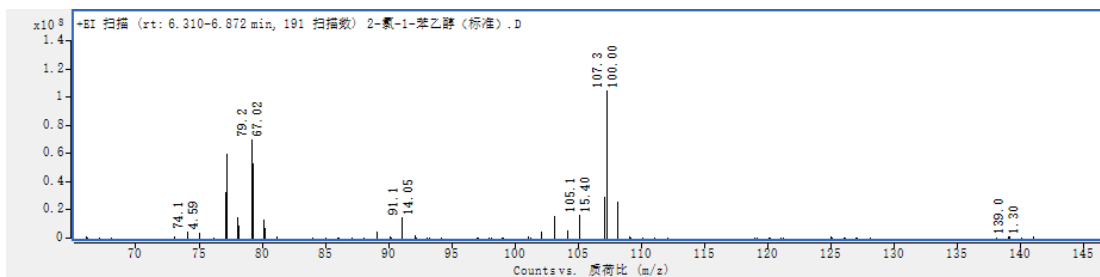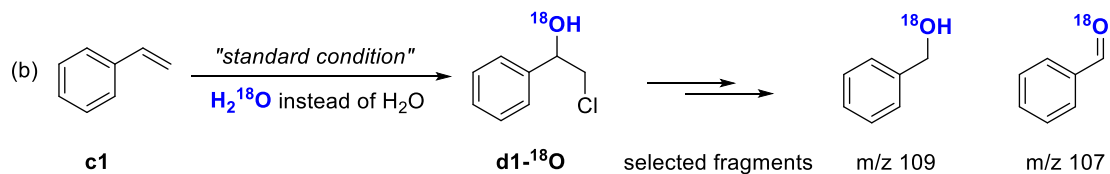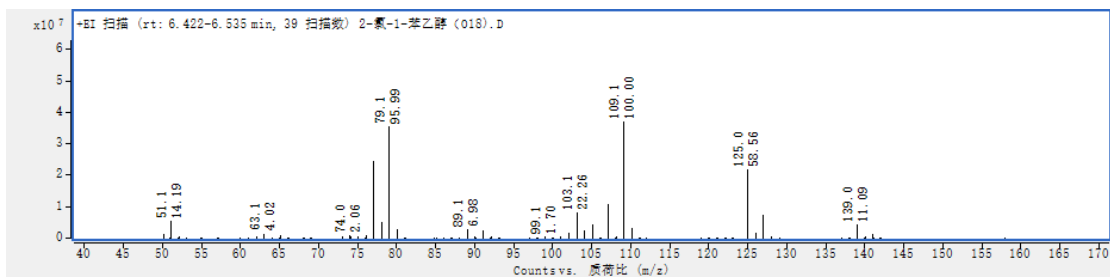

**Scheme S2.** The GC-MS spectra of the (a) blank reaction and (b) <sup>18</sup>O-labelling experiments of styrene **c1**.

#### 4. Characterization data of products

##### 2,2-dichloro-1-phenylethan-1-one (**b1**)<sup>1</sup>

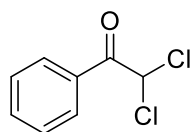

<sup>1</sup>H NMR (500 MHz, Chloroform-*d*) δ 8.12 – 8.06 (m, 2H), 7.69 – 7.63 (m, 1H), 7.56 – 7.49 (m, 2H), 6.69 (s, 1H).

<sup>13</sup>C{<sup>1</sup>H} NMR (126 MHz, Chloroform-*d*) δ 185.90, 134.58, 131.33, 129.76, 128.94, 67.79.

##### 2,2-dichloro-1-(4-methoxyphenyl)ethan-1-one (**b2**)<sup>1</sup>

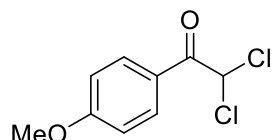

<sup>1</sup>H NMR (500 MHz, Chloroform-*d*) δ 8.11 – 8.04 (m, 2H), 7.02 – 6.95 (m, 2H), 6.65 (s, 1H), 3.90 (s, 3H).

<sup>13</sup>C{<sup>1</sup>H} NMR (126 MHz, Chloroform-*d*) δ 184.60, 164.63, 132.26, 123.91, 114.21, 67.88, 55.66.

##### 1-(4-(tert-butyl)phenyl)-2,2-dichloroethan-1-one (**b3**)<sup>1</sup>

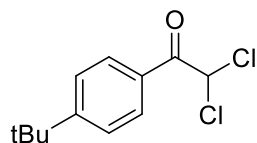

<sup>1</sup>H NMR (500 MHz, Chloroform-*d*) δ 8.06 – 8.00 (m, 2H), 7.56 – 7.50 (m, 2H), 6.68 (s, 1H), 1.35 (s, 9H).

<sup>13</sup>C{<sup>1</sup>H} NMR (126 MHz, Chloroform-*d*) δ 185.53, 158.71, 129.77, 128.60, 125.95, 67.86, 35.37, 30.99.

##### 2,2-dichloro-1-(p-tolyl)ethan-1-one (**b4**)<sup>1</sup>

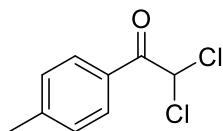

$^1\text{H}$  NMR (500 MHz, Chloroform-*d*)  $\delta$  7.97 (d,  $J = 8.0$  Hz, 2H), 7.30 (d,  $J = 8.0$  Hz, 2H), 6.69 (s, 1H), 2.43 (s, 3H).

$^{13}\text{C}\{^1\text{H}\}$  NMR (126 MHz, Chloroform-*d*)  $\delta$  185.56, 145.87, 129.84, 129.66, 128.76, 67.86, 21.85.

1-([1,1'-biphenyl]-4-yl)-2,2-dichloroethan-1-one (**b5**)<sup>1</sup>

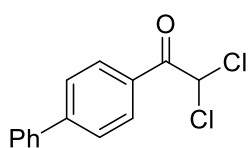

$^1\text{H}$  NMR (500 MHz, Chloroform-*d*)  $\delta$  8.20 – 8.11 (m, 2H), 7.75 – 7.70 (m, 2H), 7.65 – 7.60 (m, 2H), 7.51 – 7.46 (m, 2H), 7.45 – 7.40 (m, 1H), 6.70 (s, 1H).

$^{13}\text{C}\{^1\text{H}\}$  NMR (126 MHz, Chloroform-*d*)  $\delta$  185.54, 147.28, 139.35, 130.41, 129.92, 129.10, 128.71, 127.50, 127.34, 67.92.

2,2-dichloro-1-(4-fluorophenyl)ethan-1-one (**b6**)<sup>1</sup>

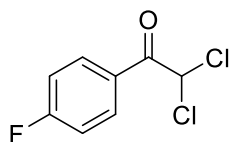

$^1\text{H}$  NMR (500 MHz, Chloroform-*d*)  $\delta$  8.19 – 8.12 (m, 2H), 7.24 – 7.16 (m, 2H), 6.61 (s, 1H).

$^{13}\text{C}\{^1\text{H}\}$  NMR (126 MHz, Chloroform-*d*)  $\delta$  183.51, 165.39 (C-F,  $^1J_{\text{C-F}} = 259.6$  Hz), 131.70 (C-F,  $^3J_{\text{C-F}} = 10.1$  Hz), 126.46 (C-F,  $^3J_{\text{C-F}} = 2.5$  Hz), 115.21 (C-F,  $^2J_{\text{C-F}} = 21.4$  Hz), 66.78.

2,2-dichloro-1-(4-chlorophenyl)ethan-1-one (**b7**)<sup>1</sup>

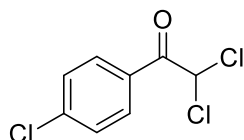

$^1\text{H}$  NMR (500 MHz, Chloroform-*d*)  $\delta$  8.08 – 8.02 (m, 2H), 7.53 – 7.47 (m, 2H), 6.60 (s, 1H).

$^{13}\text{C}\{^1\text{H}\}$  NMR (126 MHz, Chloroform-*d*)  $\delta$  184.93, 141.24, 131.24, 129.47, 129.30, 67.78.

1-(4-bromophenyl)-2,2-dichloroethan-1-one (**b8**)<sup>1</sup>

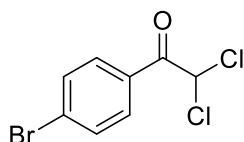

$^1\text{H}$  NMR (500 MHz, Chloroform-*d*)  $\delta$  8.01 – 7.94 (m, 2H), 7.71 – 7.65 (m, 2H), 6.59 (s, 1H).

$^{13}\text{C}\{^1\text{H}\}$  NMR (126 MHz, Chloroform-*d*)  $\delta$  185.15, 132.30, 131.26, 130.09, 129.88, 67.75.

methyl 4-(2,2-dichloroacetyl)benzoate (**b9**)<sup>1</sup>

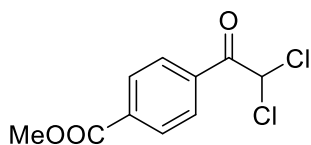

$^1\text{H}$  NMR (500 MHz, Chloroform-*d*)  $\delta$  8.20 – 8.13 (m, 4H), 6.68 (s, 1H), 3.97 (s, 3H).

$^{13}\text{C}\{^1\text{H}\}$  NMR (126 MHz, Chloroform-*d*)  $\delta$  185.47, 165.79, 135.06, 134.56, 129.95, 129.73, 67.80, 52.68.

2,2-dichloro-1-(4-(trifluoromethyl)phenyl)ethan-1-one (**b10**)<sup>1</sup>

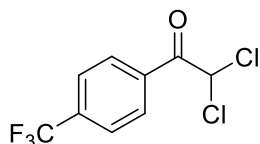

$^1\text{H}$  NMR (500 MHz, Chloroform-*d*)  $\delta$  8.24 (d,  $J$  = 8.2 Hz, 2H), 7.80 (d,  $J$  = 8.3 Hz, 2H), 6.62 (s, 1H).

$^{13}\text{C}\{^1\text{H}\}$  NMR (126 MHz, Chloroform-*d*)  $\delta$  185.11, 135.62 (C-F,  $^2J_{\text{C-F}}$  = 32.8 Hz), 133.98, 130.27, 125.92 (C-F,  $^3J_{\text{C-F}}$  = 3.8 Hz), 123.38 (C-F,  $^1J_{\text{C-F}}$  = 273.4 Hz), 67.79.

2,2-dichloro-1-(*o*-tolyl)ethan-1-one (**b11**)<sup>1</sup>

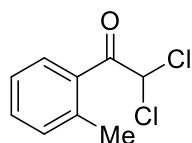

<sup>1</sup>H NMR (500 MHz, Chloroform-*d*) δ 7.73 (dd, *J* = 7.9, 1.3 Hz, 1H), 7.47 (td, *J* = 7.5, 1.3 Hz, 1H), 7.36 – 7.28 (m, 2H), 6.66 (s, 1H), 2.53 (s, 3H).

<sup>13</sup>C{<sup>1</sup>H} NMR (126 MHz, Chloroform-*d*) δ 188.41, 140.64, 132.84, 132.41, 132.36, 128.50, 125.76, 68.97, 21.27.

2,2-dichloro-1-(2-chlorophenyl)ethan-1-one (**b12**)<sup>2</sup>

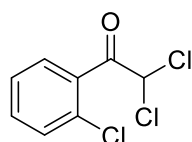

<sup>1</sup>H NMR (500 MHz, Chloroform-*d*) δ 7.61 (dd, *J* = 7.7, 1.6 Hz, 1H), 7.52 – 7.45 (m, 2H), 7.39 (td, *J* = 7.3, 1.8 Hz, 1H), 6.79 (s, 1H).

<sup>13</sup>C{<sup>1</sup>H} NMR (126 MHz, Chloroform-*d*) δ 188.78, 134.35, 133.13, 131.33, 130.59, 130.58, 127.21, 69.32.

2,2-dichloro-1-(naphthalen-1-yl)ethan-1-one (**b13**)<sup>3</sup>

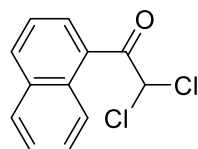

<sup>1</sup>H NMR (500 MHz, Chloroform-*d*) δ 8.51 (dd, *J* = 8.7, 1.0 Hz, 1H), 8.07 (dd, *J* = 8.2, 1.1 Hz, 1H), 7.98 (dd, *J* = 7.2, 1.1 Hz, 1H), 7.90 (dt, *J* = 8.2, 0.9 Hz, 1H), 7.65 (ddd, *J* = 8.5, 6.8, 1.4 Hz, 1H), 7.58 (ddd, *J* = 8.1, 6.8, 1.2 Hz, 1H), 7.52 (dd, *J* = 8.2, 7.3 Hz, 1H), 6.82 (s, 1H).

<sup>13</sup>C{<sup>1</sup>H} NMR (126 MHz, Chloroform-*d*) δ 188.50, 134.46, 134.00, 131.01, 130.29, 128.80, 128.73, 128.25, 127.07, 125.39, 124.11, 69.19.

2,2-dichloro-1-(naphthalen-2-yl)ethan-1-one (**b14**)<sup>1</sup>

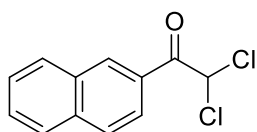

<sup>1</sup>H NMR (500 MHz, Chloroform-*d*) δ 8.62 (s, 1H), 8.07 (dd, *J* = 8.7, 1.9 Hz, 1H), 7.98 (dd, *J* = 8.2, 1.1 Hz, 1H), 7.92 (d, *J* = 8.7 Hz, 1H), 7.88 (dd, *J* = 8.2, 1.1 Hz, 1H), 7.65 (ddd, *J* = 8.2, 6.9, 1.3 Hz, 1H), 7.58 (ddd, *J* = 8.1, 6.9, 1.2 Hz, 1H), 6.84 (s, 1H).

<sup>13</sup>C{<sup>1</sup>H} NMR (126 MHz, Chloroform-*d*) δ 185.94, 136.09, 132.25, 131.98, 129.89, 129.53, 128.93, 128.59, 127.90, 127.27, 124.59, 67.90.

2,2-dichloro-1-(thiophen-2-yl)ethan-1-one (**b15**)<sup>4</sup>

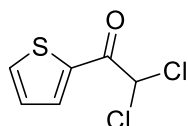

<sup>1</sup>H NMR (500 MHz, Chloroform-*d*) δ 8.01 (dd, *J* = 3.9, 1.1 Hz, 1H), 7.80 (dd, *J* = 4.9, 1.1 Hz, 1H), 7.21 (dd, *J* = 4.9, 3.9 Hz, 1H), 6.48 (s, 1H).

<sup>13</sup>C{<sup>1</sup>H} NMR (126 MHz, Chloroform-*d*) δ 179.78, 137.09, 136.37, 134.89, 128.57, 68.01.

2-(4,4-dichloro-3-oxobutyl)isoindoline-1,3-dione (**b16**)

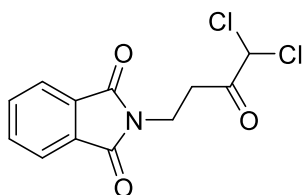

White solid

<sup>1</sup>H NMR (500 MHz, Chloroform-*d*) δ 7.85 (dd, *J* = 5.4, 3.1 Hz, 2H), 7.74 (dd, *J* = 5.5, 3.1 Hz, 2H), 5.88 (s, 1H), 4.05 (t, *J* = 7.1 Hz, 2H), 3.29 (t, *J* = 7.1 Hz, 2H).

<sup>13</sup>C{<sup>1</sup>H} NMR (126 MHz, Chloroform-*d*) δ 194.52, 167.90, 134.16, 131.92, 123.41, 69.60, 33.49, 33.07.

HRMS (ESI) *m/z* calcd for C<sub>12</sub>H<sub>9</sub>Cl<sub>2</sub>NO<sub>3</sub>Na [M+Na]<sup>+</sup> 307.9857, found 307.9853

1,2-bis(4-(tert-butyl)phenyl)-2,2-dichloroethan-1-one (**b17**)<sup>5</sup>

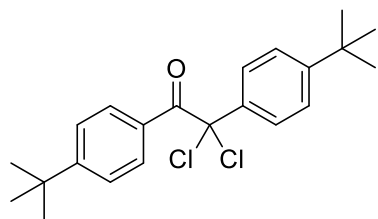

<sup>1</sup>H NMR (500 MHz, Chloroform-*d*) δ 7.79 – 7.73 (m, 2H), 7.61 – 7.55 (m, 2H), 7.45 – 7.40 (m, 2H), 7.36 – 7.30 (m, 2H), 1.32 (s, 9H), 1.28 (s, 9H).

<sup>13</sup>C NMR (126 MHz, Chloroform-*d*) δ 186.51, 157.12, 153.08, 136.70, 131.24, 129.04, 125.90, 125.79, 125.11, 90.23, 35.15, 34.77, 31.21, 30.98.

2,2-dichloro-1,2-diphenylethan-1-one (**b18**)<sup>3</sup>

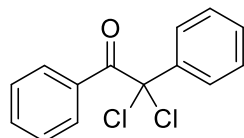

<sup>1</sup>H NMR (500 MHz, Chloroform-*d*) δ 7.82 – 7.76 (m, 2H), 7.68 – 7.64 (m, 2H), 7.50 – 7.45 (m, 1H), 7.45 – 7.38 (m, 3H), 7.31 (t, *J* = 7.9 Hz, 2H).

<sup>13</sup>C{<sup>1</sup>H} NMR (126 MHz, Chloroform-*d*) δ 186.69, 139.54, 133.30, 131.71, 131.15, 129.87, 128.99, 128.13, 126.02, 89.91.

1,2-bis(4-bromophenyl)-2,2-dichloroethan-1-one (**b19**)<sup>6</sup>

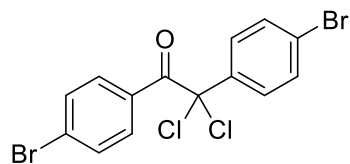

<sup>1</sup>H NMR (500 MHz, Chloroform-*d*) δ 7.73 – 7.68 (m, 2H), 7.58 – 7.54 (m, 2H), 7.51 – 7.47 (m, 4H).

<sup>13</sup>C{<sup>1</sup>H} NMR (126 MHz, Chloroform-*d*) δ 185.42, 138.30, 132.60, 132.24, 131.67, 130.05, 129.08, 127.85, 124.54, 88.59.

2,2-dichloro-1,2-bis(4-(trifluoromethyl)phenyl)ethan-1-one (**b20**)<sup>5</sup>

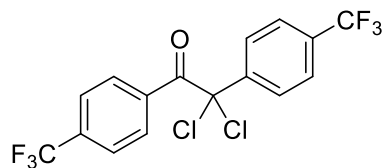

$^1\text{H}$  NMR (500 MHz, Chloroform-*d*)  $\delta$  7.98 (d,  $J$  = 8.3 Hz, 2H), 7.80 (d,  $J$  = 8.3 Hz, 2H), 7.72 (d,  $J$  = 8.5 Hz, 2H), 7.64 (d,  $J$  = 8.3 Hz, 2H).

$^{13}\text{C}\{^1\text{H}\}$  NMR (126 MHz, Chloroform-*d*)  $\delta$  185.50, 142.39, 134.82 (C-F,  $^2J_{\text{C-F}}$  = 32.8 Hz), 134.35, 132.22 (C-F,  $^2J_{\text{C-F}}$  = 32.8 Hz), 131.36, 126.95, 126.12 (C-F,  $^3J_{\text{C-F}}$  = 3.8 Hz), 125.38 (C-F,  $^3J_{\text{C-F}}$  = 3.8 Hz), 123.42 (C-F,  $^1J_{\text{C-F}}$  = 273.4 Hz), 123.24 (C-F,  $^1J_{\text{C-F}}$  = 273.4 Hz), 87.83.

2,2-dichloro-1,2-di-*o*-tolylethan-1-one (**b21**)<sup>5</sup>

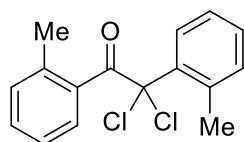

$^1\text{H}$  NMR (500 MHz, Chloroform-*d*)  $\delta$  8.14 – 8.07 (m, 1H), 7.36 – 7.31 (m, 2H), 7.29 – 7.24 (m, 2H), 7.19 – 7.13 (m, 1H), 7.07 (dd,  $J$  = 8.0, 1.1 Hz, 1H), 6.88 (ddd,  $J$  = 8.4, 6.5, 2.1 Hz, 1H), 2.57 (s, 3H), 2.28 (s, 3H).

$^{13}\text{C}\{^1\text{H}\}$  NMR (126 MHz, Chloroform-*d*)  $\delta$  188.37, 140.95, 137.31, 135.71, 132.43, 132.34, 132.10, 131.76, 130.07, 128.89, 126.88, 126.56, 124.62, 92.59, 21.68, 20.94.

2,2-dichloro-1,2-bis(2-chlorophenyl)ethan-1-one (**b22**)

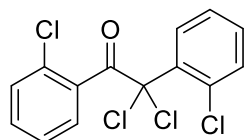

Pale yellow solid.

$^1\text{H}$  NMR (500 MHz, Chloroform-*d*)  $\delta$  8.16 – 8.10 (m, 1H), 7.55 (dd,  $J$  = 8.0, 1.6 Hz, 1H), 7.41 (dd,  $J$  = 8.1, 1.2 Hz, 1H), 7.34 (ddd,  $J$  = 7.9, 5.5, 3.4 Hz, 1H), 7.31 – 7.23 (m, 3H), 7.00 (td,  $J$  = 7.7, 1.2 Hz, 1H).

$^{13}\text{C}\{^1\text{H}\}$  NMR (126 MHz, Chloroform-*d*)  $\delta$  185.46, 136.61, 134.95, 132.49, 132.34, 131.77, 131.71, 131.37, 131.14, 130.24, 129.04, 127.30, 125.23, 88.14.



HRMS (ESI)  $m/z$  calcd for  $C_{14}H_{8}Cl_4ONa$   $[M+Na]^+$  354.9227, found 354.9215

2,2-dichloro-1-phenylpropan-1-one (**b23**)<sup>2</sup>

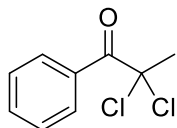

$^1H$  NMR (500 MHz, Chloroform-*d*)  $\delta$  8.35 – 8.30 (m, 2H), 7.62 – 7.57 (m, 1H), 7.48 (t,  $J = 7.8$  Hz, 2H), 2.36 (s, 3H).

$^{13}C\{^1H\}$  NMR (126 MHz, Chloroform-*d*)  $\delta$  188.11, 133.60, 131.30, 131.18, 128.12, 82.72, 34.29.

2,2-dichloro-1-phenylbutan-1-one (**b24**)<sup>7</sup>

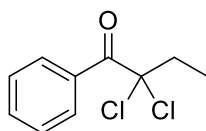

$^1H$  NMR (500 MHz, Chloroform-*d*)  $\delta$  8.28 (dd,  $J = 8.1, 1.4$  Hz, 2H), 7.61 – 7.56 (m, 1H), 7.47 (t,  $J = 7.7$  Hz, 2H), 2.54 (q,  $J = 7.2$  Hz, 2H), 1.26 (t,  $J = 7.2$  Hz, 3H).

$^{13}C\{^1H\}$  NMR (126 MHz, Chloroform-*d*)  $\delta$  188.48, 133.39, 132.15, 130.94, 128.08, 88.43, 37.85, 9.23.

2,2-dichloro-1-phenylpentan-1-one (**b25**)<sup>8</sup>

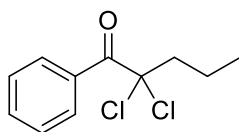

$^1H$  NMR (500 MHz, Chloroform-*d*)  $\delta$  8.27 (d,  $J = 7.6$  Hz, 2H), 7.58 (t,  $J = 7.4$  Hz, 1H), 7.46 (t,  $J = 7.8$  Hz, 2H), 2.52 – 2.43 (m, 2H), 1.79 – 1.68 (m, 2H), 1.04 (t,  $J = 7.4$  Hz, 3H).

$^{13}C\{^1H\}$  NMR (126 MHz, Chloroform-*d*)  $\delta$  188.50, 133.39, 132.11, 130.94, 128.08, 87.47, 46.44, 18.25, 13.69.

2,2-dichloro-1-phenylhexan-1-one (**b26**)<sup>9</sup>

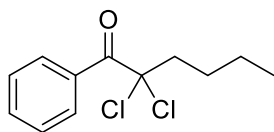

<sup>1</sup>H NMR (500 MHz, Chloroform-*d*) δ 8.30 – 8.24 (m, 2H), 7.61 – 7.55 (m, 1H), 7.50 – 7.43 (m, 2H), 2.54 – 2.47 (m, 2H), 1.73 – 1.64 (m, 2H), 1.44 (dt, *J* = 14.8, 7.4 Hz, 2H), 0.97 (t, *J* = 7.4 Hz, 3H).

<sup>13</sup>C{<sup>1</sup>H} NMR (126 MHz, Chloroform-*d*) δ 188.54, 133.36, 132.17, 130.92, 128.07, 87.70, 44.25, 26.89, 22.34, 13.92.

2,2-dichloro-3-hydroxy-1-phenylpropan-1-one (**b27**)<sup>7</sup>

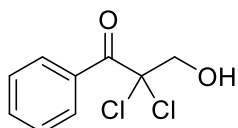

<sup>1</sup>H NMR (500 MHz, Chloroform-*d*) δ 8.32 (dd, *J* = 8.4, 1.4 Hz, 2H), 7.66 – 7.59 (m, 1H), 7.49 (t, *J* = 7.9 Hz, 2H), 4.27 (s, 2H), 2.97 (s, 1H).

<sup>13</sup>C{<sup>1</sup>H} NMR (126 MHz, Chloroform-*d*) δ 189.21, 134.27, 131.17, 131.10, 128.30, 83.57, 70.63.

2-chloro-1-(*p*-tolyl)ethan-1-ol (**d1**)<sup>10</sup>

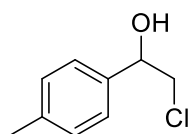

<sup>1</sup>H NMR (500 MHz, Chloroform-*d*) δ 7.27 (d, *J* = 7.8 Hz, 2H), 7.18 (d, *J* = 7.7 Hz, 2H), 4.86 (dd, *J* = 8.8, 3.4 Hz, 1H), 3.72 (dd, *J* = 11.2, 3.4 Hz, 1H), 3.63 (dd, *J* = 11.3, 8.7 Hz, 1H), 2.54 (d, *J* = 65.2 Hz, 1H), 2.35 (s, 3H).

<sup>13</sup>C{<sup>1</sup>H} NMR (126 MHz, Chloroform-*d*) δ 138.28, 136.98, 129.35, 125.99, 73.96, 50.92, 21.18.

2-chloro-1-phenylethan-1-ol (**d2**)<sup>10</sup>

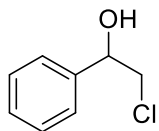

$^1\text{H}$  NMR (500 MHz, Chloroform-*d*)  $\delta$  7.44 – 7.30 (m, 5H), 4.90 (dd,  $J = 8.8, 3.4$  Hz, 1H), 3.74 (dd,  $J = 11.3, 3.4$  Hz, 1H), 3.64 (dd,  $J = 11.3, 8.8$  Hz, 1H), 2.50 (s, 1H).  
 $^{13}\text{C}\{^1\text{H}\}$  NMR (126 MHz, Chloroform-*d*)  $\delta$  139.92, 128.68, 128.47, 126.06, 74.09, 50.92.

2-chloro-1-(4-fluorophenyl)ethan-1-ol (**d3**)<sup>11</sup>

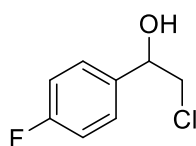

$^1\text{H}$  NMR (500 MHz, Chloroform-*d*)  $\delta$  7.37 (ddd,  $J = 8.5, 5.3, 2.5$  Hz, 2H), 7.11 – 7.01 (m, 2H), 4.88 (dd,  $J = 8.7, 3.5$  Hz, 1H), 3.71 (dd,  $J = 11.3, 3.4$  Hz, 1H), 3.61 (dd,  $J = 11.3, 8.8$  Hz, 1H), 2.70 (s, 1H).  
 $^{13}\text{C}\{^1\text{H}\}$  NMR (126 MHz, Chloroform-*d*)  $\delta$  162.67 (C-F,  $^1J_{\text{C-F}} = 247.0$  Hz), 135.70 (C-F,  $^3J_{\text{C-F}} = 3.8$  Hz), 127.81 (C-F,  $^3J_{\text{C-F}} = 7.6$  Hz), 115.59 (C-F,  $^2J_{\text{C-F}} = 21.4$  Hz), 73.43, 50.81.

2-chloro-1-(4-chlorophenyl)ethan-1-ol (**d4**)<sup>10</sup>

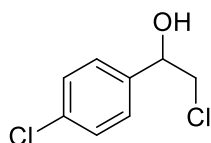

$^1\text{H}$  NMR (500 MHz, Chloroform-*d*)  $\delta$  7.38 – 7.29 (m, 4H), 4.88 (dd,  $J = 8.7, 3.4$  Hz, 1H), 3.71 (ddd,  $J = 11.3, 3.5, 1.0$  Hz, 1H), 3.60 (ddd,  $J = 11.2, 8.6, 1.0$  Hz, 1H), 2.71 (s, 1H).  
 $^{13}\text{C}\{^1\text{H}\}$  NMR (126 MHz, Chloroform-*d*)  $\delta$  138.35, 134.24, 128.85, 127.45, 73.37, 50.69.

methyl 4-(2-chloro-1-hydroxyethyl)benzoate (**d5**)<sup>11</sup>

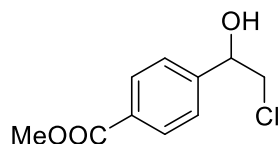

$^1\text{H}$  NMR (500 MHz, Chloroform-*d*)  $\delta$  8.05 – 8.00 (m, 2H), 7.48 – 7.43 (m, 2H), 4.95 (dd,  $J = 8.4, 3.5$  Hz, 1H), 3.90 (s, 3H), 3.74 (dd,  $J = 11.3, 3.5$  Hz, 1H), 3.63 (dd,  $J = 11.3, 8.4$  Hz, 1H), 2.96 (s, 1H).

$^{13}\text{C}\{^1\text{H}\}$  NMR (126 MHz, Chloroform-*d*)  $\delta$  166.72, 144.90, 130.07, 129.85, 126.02, 73.53, 52.16, 50.44.

2-chloro-1-(4-(trifluoromethyl)phenyl)ethan-1-ol (**d6**)<sup>11</sup>

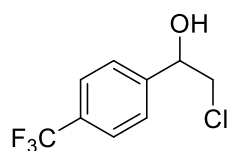

$^1\text{H}$  NMR (500 MHz, Chloroform-*d*)  $\delta$  7.63 (d,  $J = 8.0$  Hz, 2H), 7.51 (d,  $J = 8.0$  Hz, 2H), 4.96 (dd,  $J = 8.5, 3.5$  Hz, 1H), 3.75 (dd,  $J = 11.3, 3.5$  Hz, 1H), 3.63 (dd,  $J = 11.3, 8.5$  Hz, 1H), 2.91 (s, 1H).

$^{13}\text{C}\{^1\text{H}\}$  NMR (126 MHz, Chloroform-*d*)  $\delta$  143.79, 130.62 (C-F,  $^2J_{\text{C-F}} = 32.8$  Hz), 126.45, 125.60 (C-F,  $^3J_{\text{C-F}} = 3.8$  Hz), 123.97 (C-F,  $^1J_{\text{C-F}} = 272.2$  Hz), 73.38, 50.49.

2-chloro-1-(4-nitrophenyl)ethan-1-ol (**d7**)<sup>12</sup>

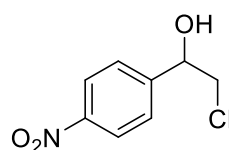

$^1\text{H}$  NMR (500 MHz, Chloroform-*d*)  $\delta$  8.28 – 8.20 (m, 2H), 7.62 – 7.56 (m, 2H), 5.04 (dd,  $J = 8.2, 3.6$  Hz, 1H), 3.79 (dd,  $J = 11.4, 3.6$  Hz, 1H), 3.64 (dd,  $J = 11.4, 8.2$  Hz, 1H), 2.77 (s, 1H).

$^{13}\text{C}\{^1\text{H}\}$  NMR (126 MHz, Chloroform-*d*)  $\delta$  147.88, 146.93, 127.02, 123.84, 73.01, 50.30.

2-chloro-1-(*o*-tolyl)ethan-1-ol (**d8**)<sup>12</sup>

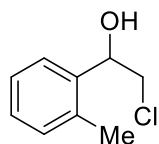

$^1\text{H}$  NMR (500 MHz, Chloroform-*d*)  $\delta$  7.51 (dd,  $J = 7.3, 1.9$  Hz, 1H), 7.23 (pd,  $J = 7.4, 1.7$  Hz, 2H), 7.18 – 7.13 (m, 1H), 5.10 (dd,  $J = 9.2, 3.0$  Hz, 1H), 3.69 (dd,  $J = 11.3, 3.1$  Hz, 1H), 3.59 (dd,  $J = 11.3, 9.2$  Hz, 1H), 2.65 (s, 1H), 2.35 (s, 3H).

$^{13}\text{C}\{^1\text{H}\}$  NMR (126 MHz, Chloroform-*d*)  $\delta$  137.94, 134.78, 130.62, 128.23, 126.49, 125.54, 70.98, 49.93, 19.06.

2-chloro-1-(naphthalen-2-yl)ethan-1-ol (**d9**)<sup>10</sup>

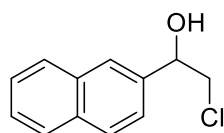

$^1\text{H}$  NMR (500 MHz, Chloroform-*d*)  $\delta$  7.92 – 7.76 (m, 4H), 7.47 (ddd,  $J = 16.8, 8.0, 3.2$  Hz, 3H), 5.05 (dd,  $J = 8.8, 3.4$  Hz, 1H), 3.81 (dd,  $J = 11.3, 3.5$  Hz, 1H), 3.72 (dd,  $J = 11.3, 8.8$  Hz, 1H), 3.04 – 2.55 (m, 1H).

$^{13}\text{C}\{^1\text{H}\}$  NMR (126 MHz, Chloroform-*d*)  $\delta$  137.30, 133.32, 133.22, 128.54, 128.07, 127.75, 126.43, 126.32, 125.30, 123.68, 74.21, 50.82.

2-chloro-1-(naphthalen-1-yl)ethan-1-ol (**d10**)<sup>13</sup>

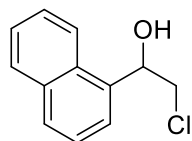

$^1\text{H}$  NMR (500 MHz, Chloroform-*d*)  $\delta$  8.00 (d,  $J = 8.3$  Hz, 1H), 7.88 (dd,  $J = 8.1, 1.5$  Hz, 1H), 7.82 (d,  $J = 8.2$  Hz, 1H), 7.73 (dd,  $J = 7.2, 1.1$  Hz, 1H), 7.58 – 7.45 (m, 3H), 5.67 (dd,  $J = 9.2, 2.8$  Hz, 1H), 3.94 (dd,  $J = 11.5, 2.8$  Hz, 1H), 3.73 (dd,  $J = 11.5, 9.2$  Hz, 1H), 2.87 (s, 1H).

$^{13}\text{C}\{^1\text{H}\}$  NMR (126 MHz, Chloroform-*d*)  $\delta$  135.32, 133.77, 130.18, 129.15, 128.93, 126.59, 125.79, 125.49, 123.70, 122.37, 71.32, 50.53.

(8R,9S,13S,14S)-3-(2-chloro-1-hydroxyethyl)-13-methyl-6,7,8,9,11,12,13,14,15,16-decahydro-17H-cyclopenta[a]phenanthren-17-one (**d11**)

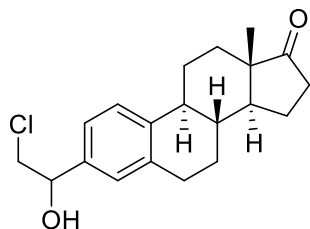

White solid.

$^1\text{H}$  NMR (500 MHz, Chloroform-*d*)  $\delta$  7.30 (d,  $J = 8.0$  Hz, 1H), 7.18 – 7.11 (m, 2H), 4.84 (dd,  $J = 8.8, 3.4$  Hz, 1H), 3.74 (dd,  $J = 11.2, 3.4$  Hz, 1H), 3.69 – 3.61 (m, 1H), 2.93 (dd,  $J = 9.1, 4.3$  Hz, 2H), 2.51 (dd,  $J = 18.9, 8.8$  Hz, 1H), 2.43 (dt,  $J = 12.9, 3.9$  Hz, 1H), 2.30 (ddt,  $J = 17.2, 10.7, 4.8$  Hz, 1H), 2.22 – 1.93 (m, 5H), 1.70 – 1.57 (m, 2H), 1.57 – 1.40 (m, 4H), 0.91 (s, 3H).

$^{13}\text{C}\{^1\text{H}\}$  NMR (126 MHz, Chloroform-*d*)  $\delta$  140.10, 137.41, 136.95, 126.64, 126.63, 125.69, 123.52, 123.49, 73.91, 73.84, 50.88, 50.52, 47.97, 44.39, 38.08, 35.85, 31.59, 29.45, 29.42, 26.44, 25.71, 21.59, 13.85.

HRMS (ESI)  $m/z$  calcd for  $\text{C}_{20}\text{H}_{25}\text{ClO}_2\text{Na}$   $[\text{M}+\text{Na}]^+$  355.1441, found 355.1425

2-chloro-1-(pyridin-3-yl)ethan-1-ol (**d12**)<sup>14</sup>

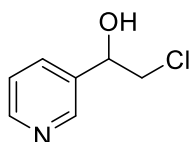

$^1\text{H}$  NMR (500 MHz, Chloroform-*d*)  $\delta$  8.62 – 8.44 (m, 2H), 7.79 (dt,  $J = 8.0, 1.9$  Hz, 1H), 7.33 (dd,  $J = 7.9, 4.9$  Hz, 1H), 4.96 (dd,  $J = 7.7, 4.2$  Hz, 1H), 4.24 (s, 1H), 3.78 – 3.64 (m, 2H).

$^{13}\text{C}\{^1\text{H}\}$  NMR (126 MHz, Chloroform-*d*)  $\delta$  149.08, 147.58, 136.42, 134.38, 123.72, 71.65, 50.12.

2-(3-chloro-2-hydroxypropyl)isoindoline-1,3-dione (**d13**)<sup>15</sup>

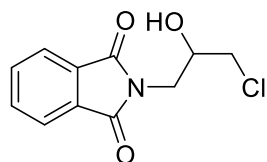

$^1\text{H}$  NMR (500 MHz, Chloroform-*d*)  $\delta$  7.87 (dt,  $J = 7.1, 3.6$  Hz, 2H), 7.75 (dd,  $J = 5.5, 3.0$  Hz, 2H), 4.18 (dq,  $J = 7.3, 4.7$  Hz, 1H), 4.00 – 3.85 (m, 2H), 3.72 – 3.58 (m, 2H), 2.86 (s, 1H).

$^{13}\text{C}\{^1\text{H}\}$  NMR (126 MHz, Chloroform-*d*)  $\delta$  168.67, 134.28, 131.84, 123.56, 69.74, 47.28, 41.60.

2-(2-chloro-3-hydroxypropyl)isoindoline-1,3-dione (**d13'**)

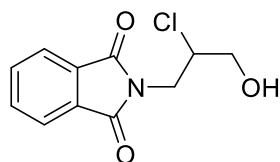

White solid.

$^1\text{H}$  NMR (500 MHz, Chloroform-*d*)  $\delta$  7.89 (dt,  $J = 7.1, 3.6$  Hz, 2H), 7.80 – 7.74 (m, 2H), 4.31 (p,  $J = 5.7$  Hz, 1H), 4.18 – 4.03 (m, 2H), 3.78 (qd,  $J = 12.6, 5.2$  Hz, 2H), 2.92 (s, 1H).

$^{13}\text{C}\{^1\text{H}\}$  NMR (126 MHz, Chloroform-*d*)  $\delta$  168.46, 134.44, 131.66, 123.70, 63.90, 58.83, 39.98.

HRMS (ESI)  $m/z$  calcd for  $\text{C}_{11}\text{H}_{10}\text{ClNO}_3\text{Na}$   $[\text{M}+\text{Na}]^+$  262.0247, found 262.0242

1-chloro-3-(phenylsulfonyl)propan-2-ol (**d14**)<sup>16</sup>

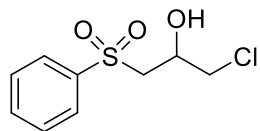

$^1\text{H}$  NMR (500 MHz, Chloroform-*d*)  $\delta$  7.95 (dd,  $J = 8.2, 1.3$  Hz, 2H), 7.74 – 7.68 (m, 1H), 7.61 (t,  $J = 7.8$  Hz, 2H), 4.46 – 4.35 (m, 1H), 3.67 – 3.58 (m, 2H), 3.46 – 3.31 (m, 3H).

$^{13}\text{C}\{^1\text{H}\}$  NMR (126 MHz, Chloroform-*d*)  $\delta$  139.01, 134.30, 129.56, 127.98, 66.22, 59.58, 47.54.

2-chloro-3-(phenylsulfonyl)propan-1-ol (**d14'**)<sup>16</sup>

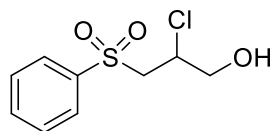

$^1\text{H}$  NMR (500 MHz, Chloroform-*d*)  $\delta$  7.95 (d,  $J = 7.8$  Hz, 2H), 7.70 (t,  $J = 7.5$  Hz, 1H), 7.61 (t,  $J = 7.6$  Hz, 2H), 4.45 (dq,  $J = 12.0, 6.8, 5.9$  Hz, 1H), 4.02 – 3.88 (m, 2H), 3.73 (dd,  $J = 14.6, 7.1$  Hz, 1H), 3.54 (dd,  $J = 14.6, 5.8$  Hz, 1H), 2.26 (s, 1H).

$^{13}\text{C}\{^1\text{H}\}$  NMR (126 MHz, Chloroform-*d*)  $\delta$  139.11, 134.30, 129.53, 128.12, 65.66, 59.64, 54.87.

*anti*-2-chloro-1-phenylpropan-1-ol (**d15**)<sup>10</sup>

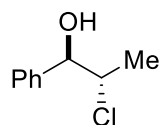

$^1\text{H}$  NMR (500 MHz, Chloroform-*d*)  $\delta$  7.42 – 7.27 (m, 5H), 4.94 (d,  $J = 3.8$  Hz, 1H), 4.31 (qd,  $J = 6.7, 3.8$  Hz, 1H), 2.46 (s, 1H), 1.38 (dd,  $J = 6.7, 2.7$  Hz, 3H).

$^{13}\text{C}\{^1\text{H}\}$  NMR (126 MHz, Chloroform-*d*)  $\delta$  139.59, 128.38, 128.06, 126.39, 77.17, 62.79, 18.04.

The reaction of *trans*- $\beta$ -methyl styrene (inseparable on silicon chromatography)

*syn*-2-chloro-1-phenylpropan-1-ol (**d15'**)<sup>10</sup>

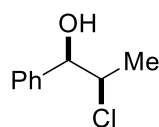

$^1\text{H}$  NMR (500 MHz, Chloroform-*d*)  $\delta$  7.43 – 7.27 (m, 5H), 4.58 (d,  $J = 7.5$  Hz, 1H), 4.25 – 4.17 (m, 1H), 2.54 (d,  $J = 259.5$  Hz, 1H), 1.37 (ddd,  $J = 6.7, 3.6, 1.0$  Hz, 3H).



$^{13}\text{C}\{^1\text{H}\}$  NMR (126 MHz, Chloroform-*d*)  $\delta$  139.63, 139.61, 128.59, 126.88, 126.41, 79.12, 64.52, 21.55.

The reaction of *cis*- $\beta$ -methyl styrene (inseparable on silicon chromatography)

*anti*-2-chloro-1,2-diphenylethan-1-ol (**d16**)<sup>10</sup>

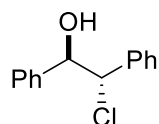

$^1\text{H}$  NMR (500 MHz, Chloroform-*d*)  $\delta$  7.37 – 7.25 (m, 10H), 5.05 (dd,  $J = 34.8, 6.5$  Hz, 2H), 2.48 – 2.20 (m, 1H).

$^{13}\text{C}\{^1\text{H}\}$  NMR (126 MHz, Chloroform-*d*)  $\delta$  139.49, 137.24, 128.73, 128.47, 128.38, 128.35, 128.19, 127.08, 78.20, 66.91.

*syn*-2-chloro-1,2-diphenylethan-1-ol (**d16'**)<sup>10</sup>

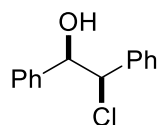

$^1\text{H}$  NMR (500 MHz, Chloroform-*d*)  $\delta$  7.25 – 7.05 (m, 10H), 5.06 – 4.90 (m, 2H), 3.04 (s, 1H).

$^{13}\text{C}\{^1\text{H}\}$  NMR (126 MHz, Chloroform-*d*)  $\delta$  138.72, 137.70, 128.55, 128.32, 128.20, 128.14, 127.98, 126.97, 78.78, 70.68.

2,2-dichloro-1-(2-chlorophenyl)ethan-1-ol (**b12'**)<sup>2,3</sup>

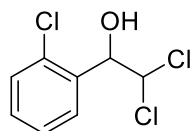

$^1\text{H}$  NMR (500 MHz, Chloroform-*d*)  $\delta$  7.65 (dd,  $J = 7.6, 1.8$  Hz, 1H), 7.41 – 7.28 (m, 3H), 6.09 (d,  $J = 3.2$  Hz, 1H), 5.50 (d,  $J = 3.3$  Hz, 1H), 2.97 (s, 1H).

$^{13}\text{C}\{^1\text{H}\}$  NMR (126 MHz, Chloroform-*d*)  $\delta$  135.10, 132.19, 129.95, 129.46, 128.81, 127.11, 75.11, 74.97.

1-chloro-2-(2,2-dichloro-1-(4-chlorophenyl)ethyl)benzene (**b12''**)<sup>2,3</sup>

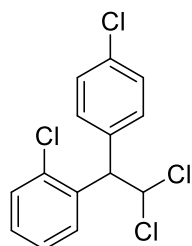

<sup>1</sup>H NMR (500 MHz, Chloroform-*d*) δ 7.43 (dd, *J* = 7.8, 1.6 Hz, 1H), 7.38 (dd, *J* = 7.9, 1.4 Hz, 1H), 7.33 – 7.26 (m, 5H), 7.21 (td, *J* = 7.7, 1.7 Hz, 1H), 6.36 (d, *J* = 8.7 Hz, 1H), 5.18 (d, *J* = 8.6 Hz, 1H).

<sup>13</sup>C{<sup>1</sup>H} NMR (126 MHz, Chloroform-*d*) δ 137.20, 136.76, 134.23, 133.64, 130.27, 130.25, 128.82, 128.80, 128.42, 127.13, 73.76, 57.22.

2,2-dichloro-1-(2-fluorophenyl)ethan-1-one (**b28**)<sup>2,3</sup>

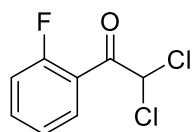

<sup>1</sup>H NMR (500 MHz, Chloroform-*d*) δ 7.98 (td, *J* = 7.5, 1.8 Hz, 1H), 7.68 – 7.60 (m, 1H), 7.32 (td, *J* = 7.6, 1.1 Hz, 1H), 7.20 (ddd, *J* = 11.3, 8.4, 1.1 Hz, 1H), 6.82 (d, *J* = 1.9 Hz, 1H).

<sup>13</sup>C{<sup>1</sup>H} NMR (126 MHz, Chloroform-*d*) δ 184.38, 184.35, 162.16, 160.13, 136.27, 136.20, 132.25, 132.23, 125.18, 125.15, 121.13, 121.04, 116.90, 116.71, 70.28, 70.19.

2,2-dichloro-1-(2-fluorophenyl)ethan-1-ol (**b28'**)<sup>2,3</sup>

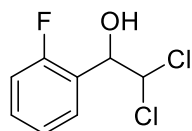

<sup>1</sup>H NMR (500 MHz, Chloroform-*d*) δ 7.56 (td, *J* = 7.5, 1.8 Hz, 1H), 7.40 – 7.32 (m, 1H), 7.21 (td, *J* = 7.6, 1.2 Hz, 1H), 7.08 (ddd, *J* = 10.6, 8.3, 1.2 Hz, 1H), 5.98 (dd, *J* = 4.5, 1.3 Hz, 1H), 5.33 (d, *J* = 4.5 Hz, 1H), 2.93 (s, 1H).

<sup>13</sup>C{<sup>1</sup>H} NMR (126 MHz, Chloroform-*d*) δ 160.90, 158.94, 130.52, 130.45, 128.54,

128.51, 124.87, 124.77, 124.44, 124.41, 115.51, 115.33, 75.40, 75.38, 73.20, 73.19.

1-(2,2-dichloro-1-(4-chlorophenyl)ethyl)-2-fluorobenzene (**d28''**)<sup>2, 3</sup>

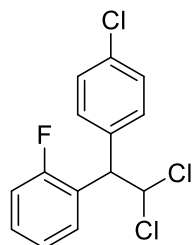

<sup>1</sup>H NMR (500 MHz, Chloroform-*d*) δ 7.37 – 7.23 (m, 6H), 7.13 (td, *J* = 7.6, 1.2 Hz, 1H), 7.05 (ddd, *J* = 10.6, 8.2, 1.2 Hz, 1H), 6.44 (d, *J* = 9.2 Hz, 1H), 4.81 (d, *J* = 9.2 Hz, 1H).

<sup>13</sup>C{<sup>1</sup>H} NMR (126 MHz, Chloroform-*d*) δ 161.21, 159.25, 137.29, 133.67, 129.86, 129.85, 129.48, 129.42, 129.34, 129.31, 128.93, 127.06, 126.95, 124.51, 124.48, 116.20, 116.02, 73.45, 73.42, 56.57, 56.56.

2-(2-bromo-4-nitro-1H-imidazol-1-yl)-1-phenylethan-1-ol (**d2'**)<sup>17</sup>

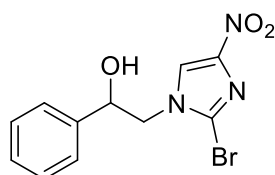

<sup>1</sup>H NMR (500 MHz, DMSO-*d*<sub>6</sub>) δ 8.51 (s, 1H), 7.41 – 7.35 (m, 4H), 7.35 – 7.28 (m, 1H), 5.90 (d, *J* = 4.5 Hz, 1H), 4.97 (dt, *J* = 8.4, 4.2 Hz, 1H), 4.26 – 4.08 (m, 2H).

<sup>13</sup>C{<sup>1</sup>H} NMR (126 MHz, DMSO-*d*<sub>6</sub>) δ 146.41, 141.77, 128.82, 128.28, 126.38, 125.38, 121.73, 71.18, 55.71.

2-(2-methoxy-4-nitro-1H-imidazol-1-yl)-1-phenylethan-1-ol (**d2''**)<sup>17</sup>

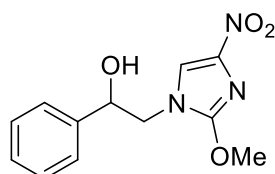

$^1\text{H}$  NMR (500 MHz,  $\text{DMSO-}d_6$ )  $\delta$  8.05 (s, 1H), 7.40 – 7.24 (m, 6H), 5.80 (d,  $J = 4.5$  Hz, 1H), 4.90 (dt,  $J = 7.3, 4.7$  Hz, 1H), 4.01 – 3.92 (m, 2H), 3.88 (s, 3H).

$^{13}\text{C}\{^1\text{H}\}$  NMR (126 MHz,  $\text{DMSO-}d_6$ )  $\delta$  151.35, 142.23, 141.80, 128.64, 128.04, 126.38, 120.66, 71.01, 58.02, 52.07.

## 5. Characterization data of products

### 2,2-dichloro-1-phenylethan-1-one (b1)

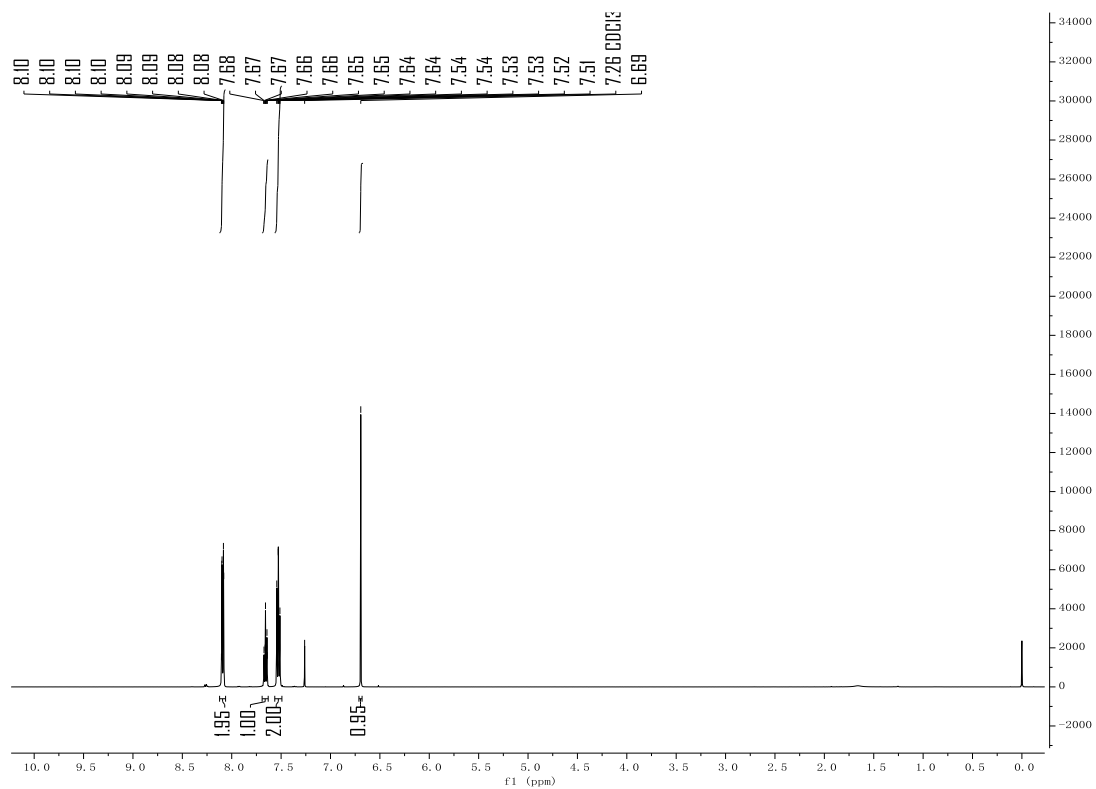

$^1\text{H}$  NMR (500 MHz, Chloroform-*d*)

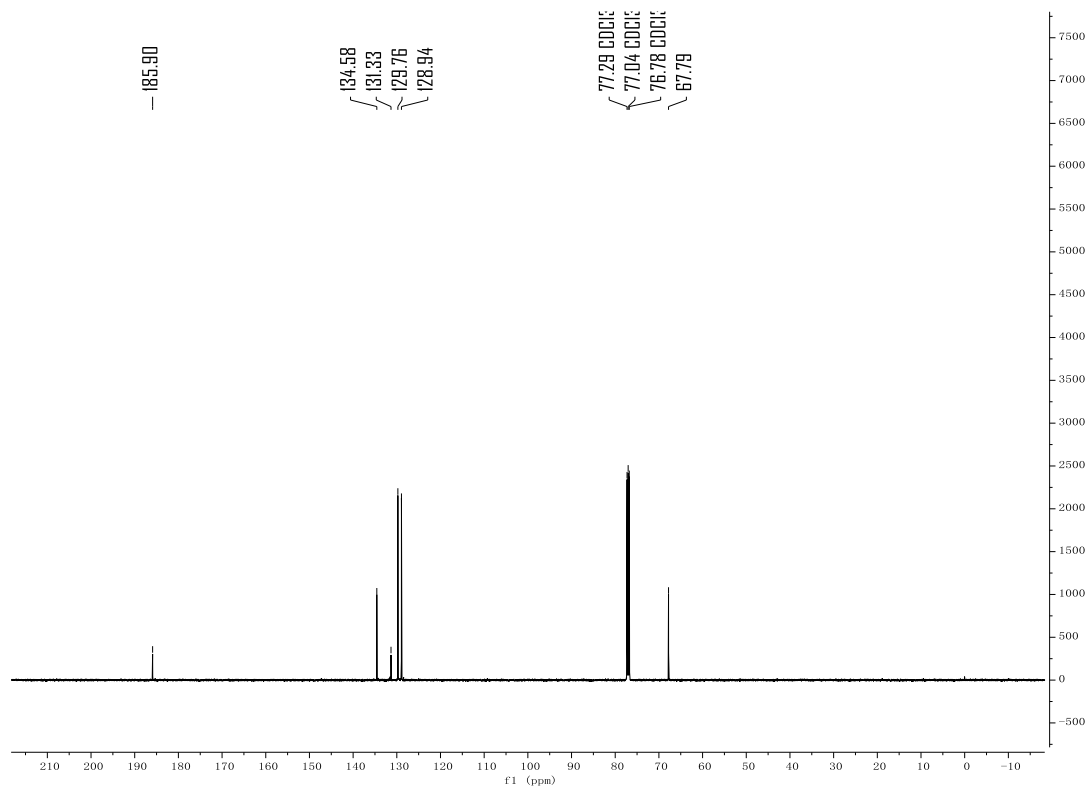

$^{13}\text{C}\{^1\text{H}\}$  NMR (126 MHz, Chloroform-*d*)

2,2-dichloro-1-(4-methoxyphenyl)ethan-1-one (**b2**)

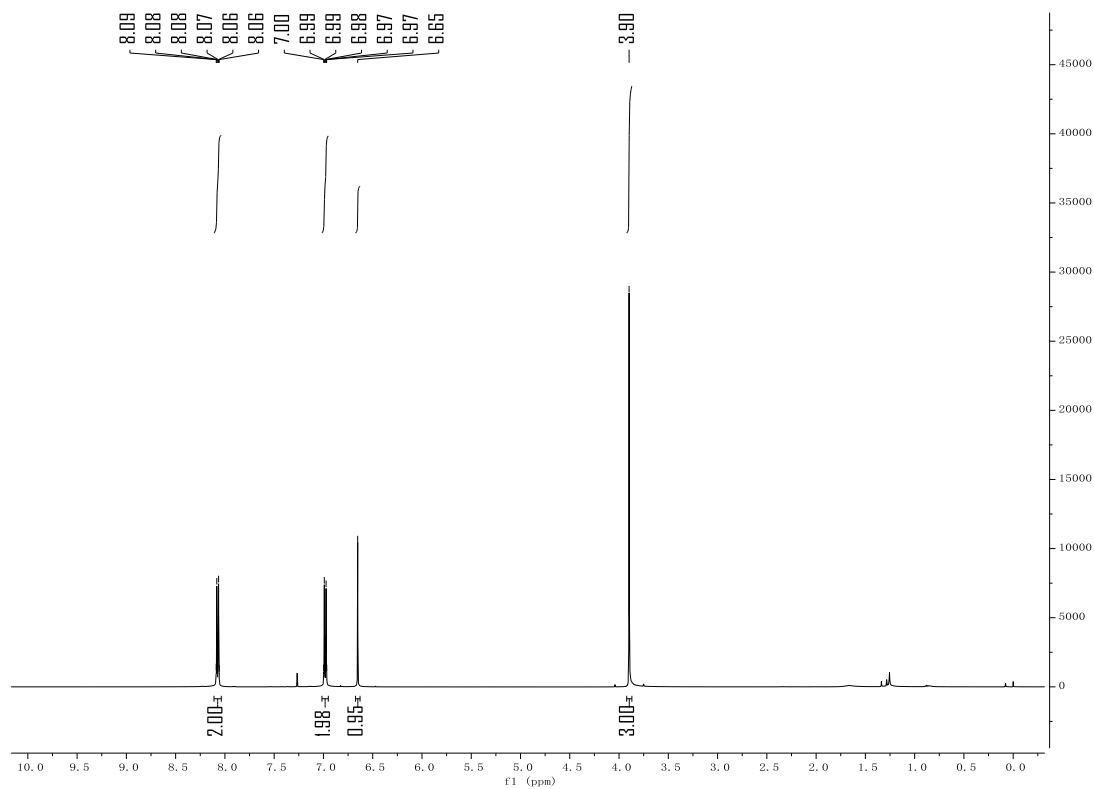

<sup>1</sup>H NMR (500 MHz, Chloroform-*d*)

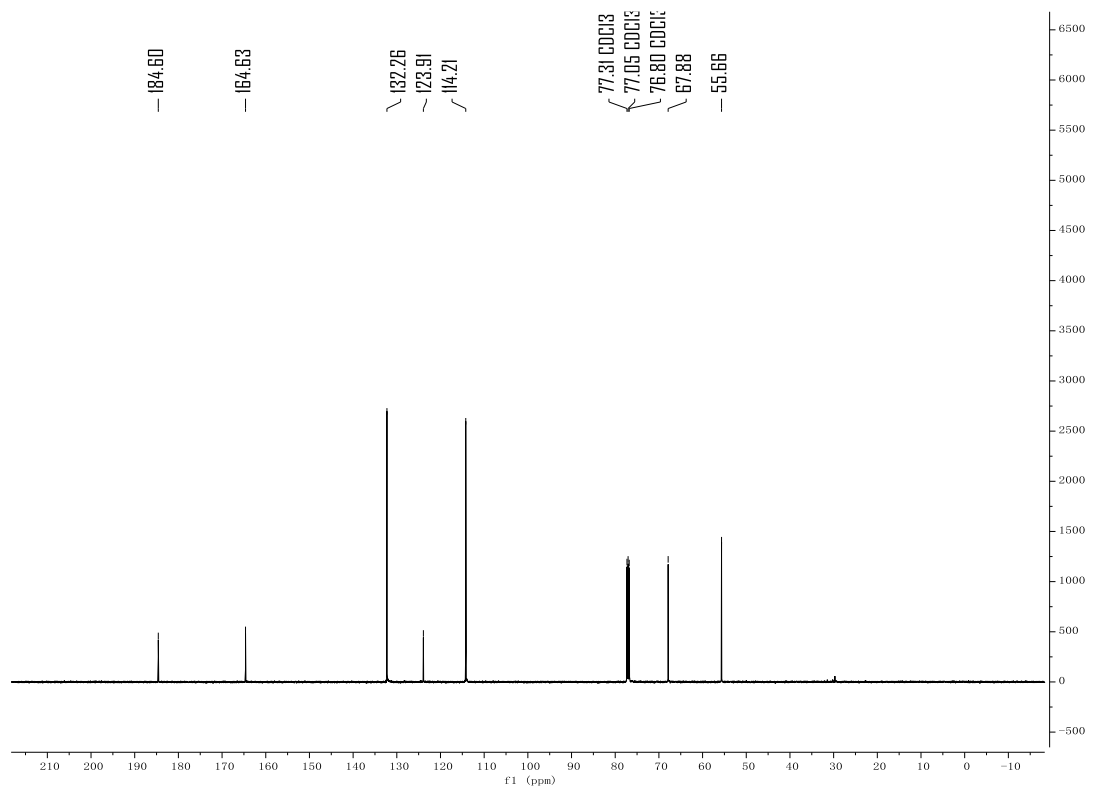

<sup>13</sup>C{<sup>1</sup>H} NMR (126 MHz, Chloroform-*d*)

1-(4-(tert-butyl)phenyl)-2,2-dichloroethan-1-one (**b3**)

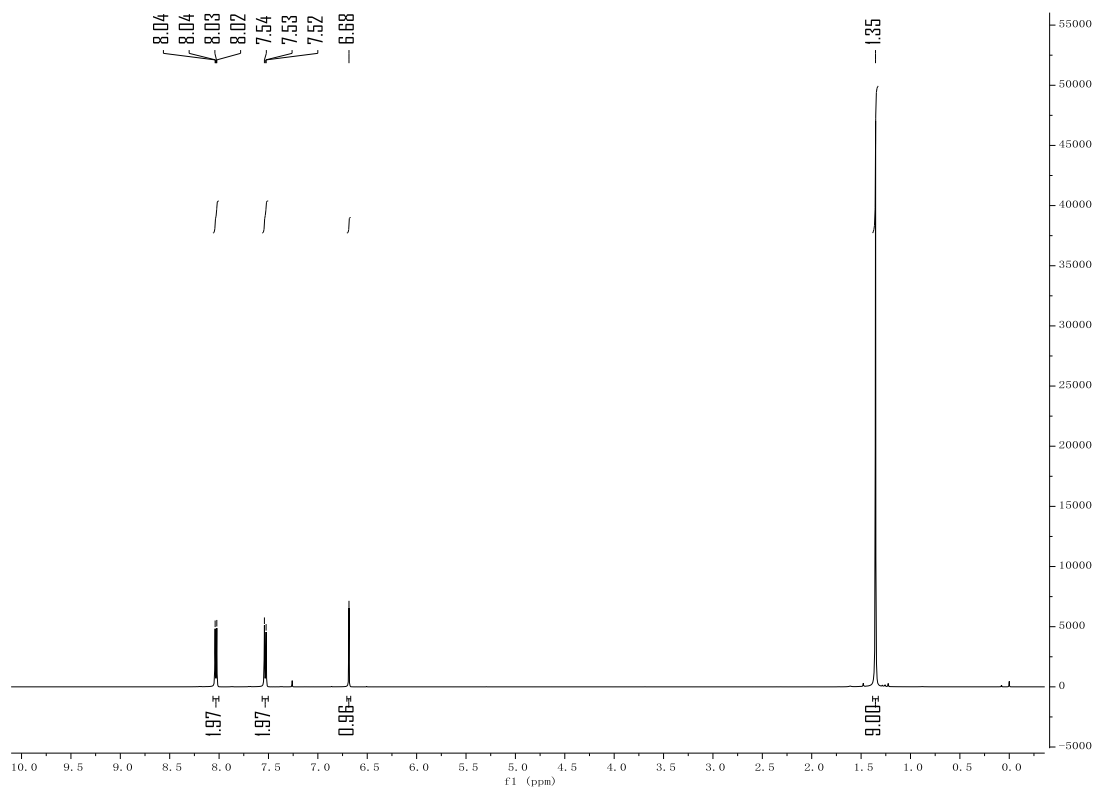

$^1\text{H}$  NMR (500 MHz, Chloroform-*d*)

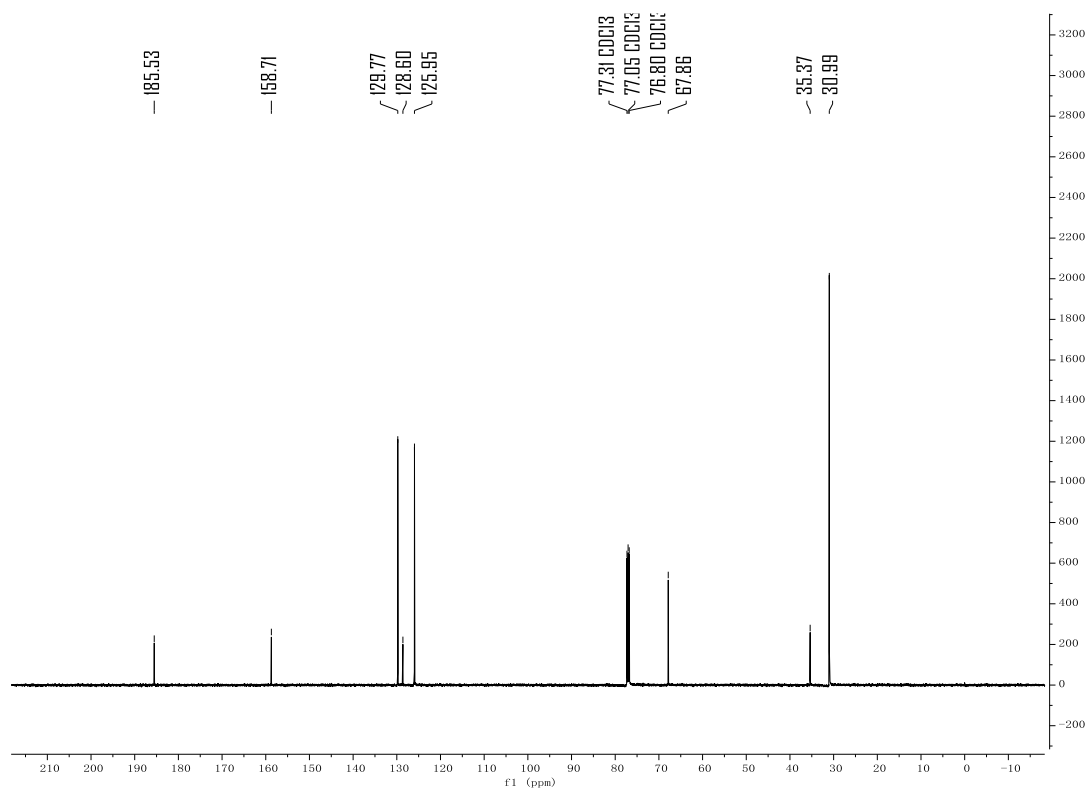

$^{13}\text{C}$  NMR (126 MHz, Chloroform-*d*)

2,2-dichloro-1-(p-tolyl)ethan-1-one (**b4**)

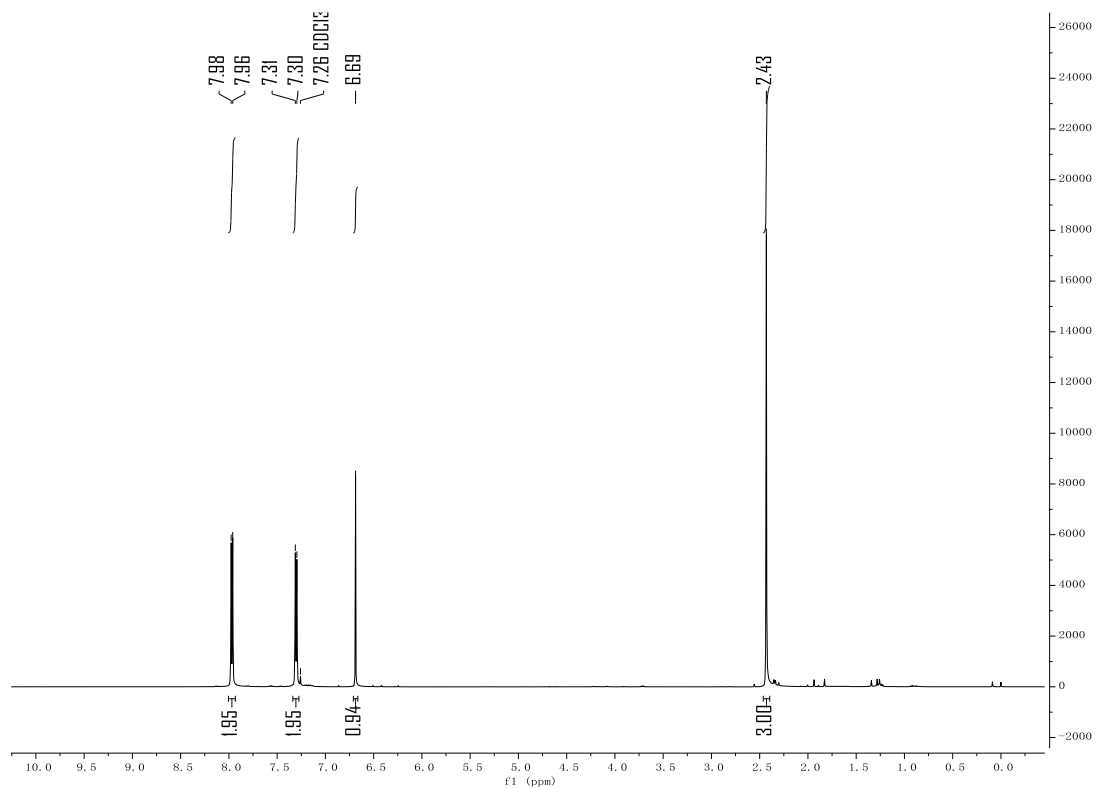

$^1\text{H}$  NMR (500 MHz, Chloroform-*d*)

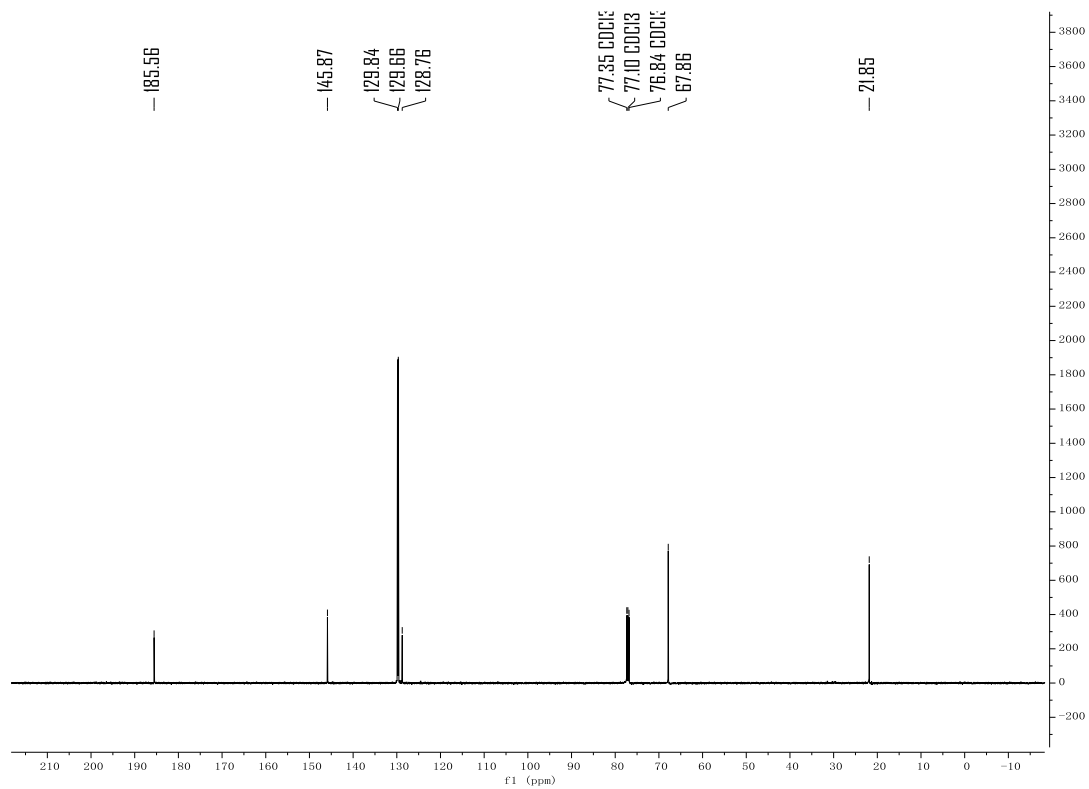

$^{13}\text{C}\{^1\text{H}\}$  NMR (126 MHz, Chloroform-*d*)



1-([1,1'-biphenyl]-4-yl)-2,2-dichloroethan-1-one (**b5**)

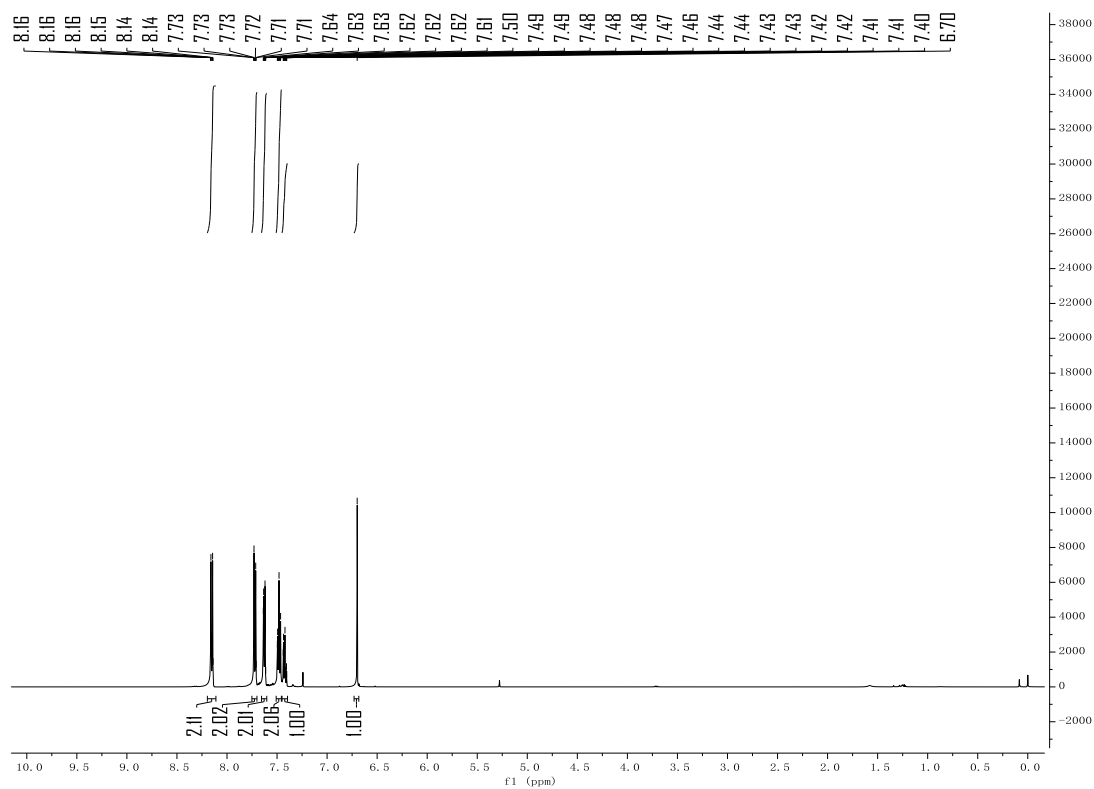

<sup>1</sup>H NMR (500 MHz, Chloroform-*d*)

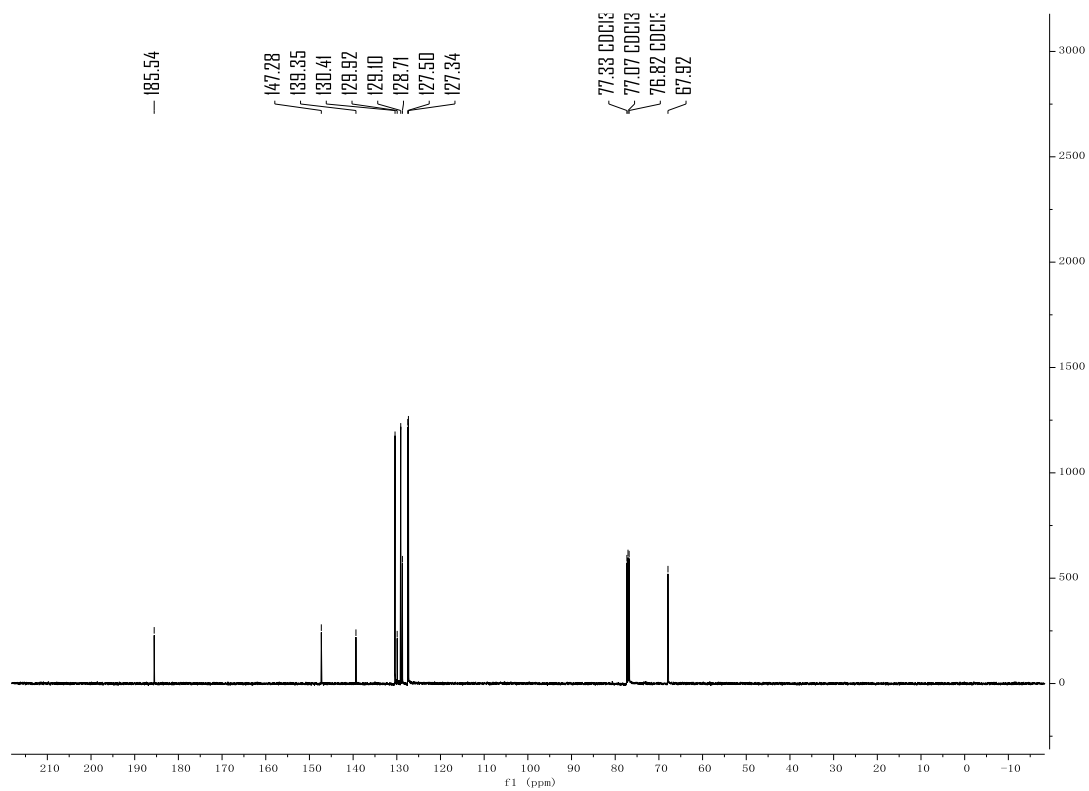

<sup>13</sup>C{<sup>1</sup>H} NMR (126 MHz, Chloroform-*d*)

2,2-dichloro-1-(4-fluorophenyl)ethan-1-one (**b6**)

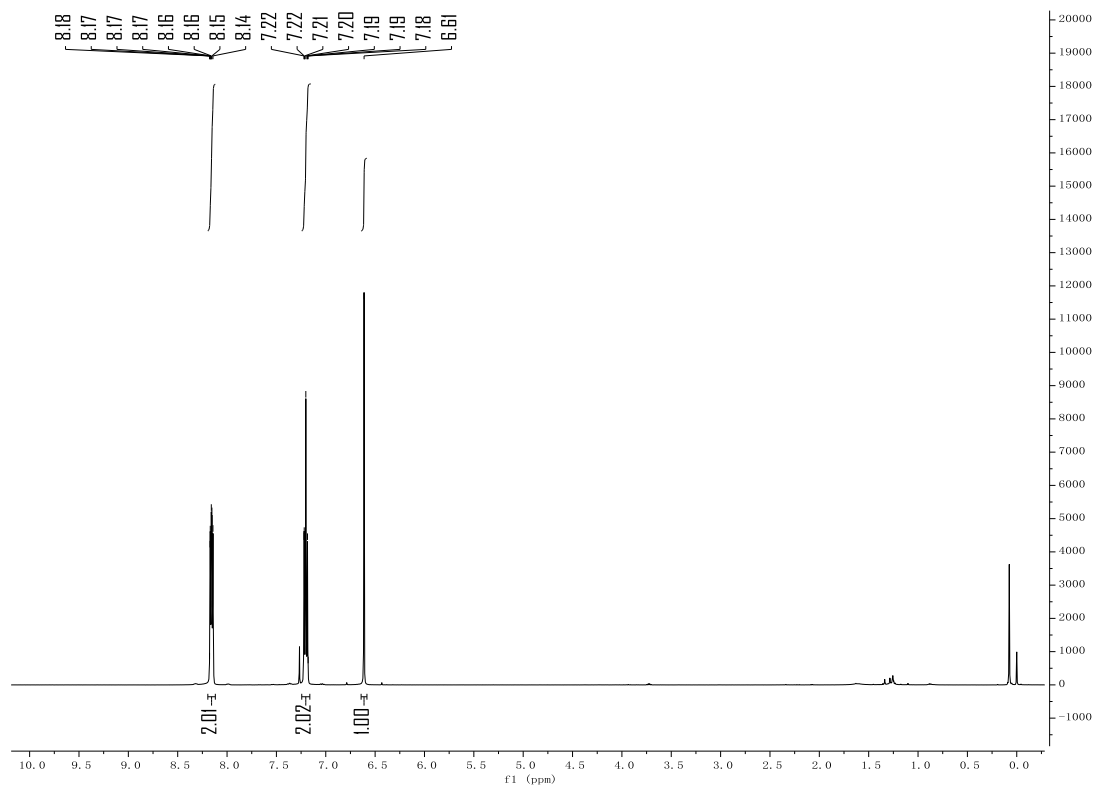

<sup>1</sup>H NMR (500 MHz, Chloroform-*d*)

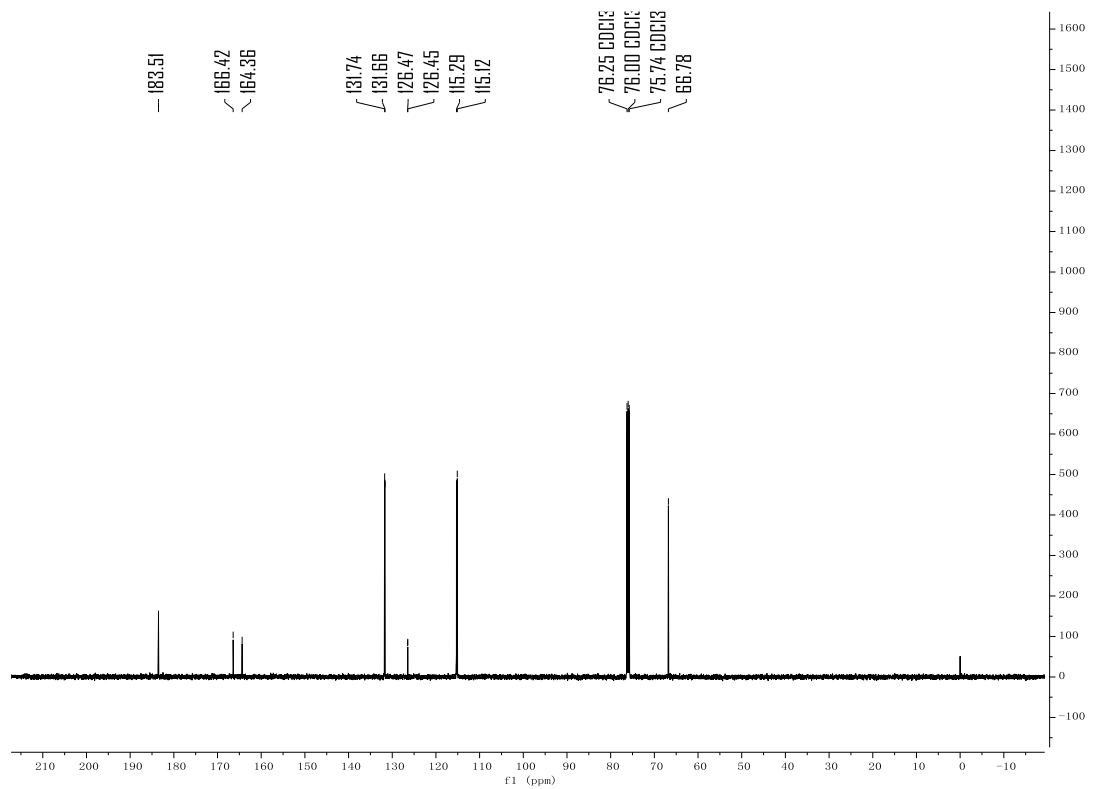

<sup>13</sup>C{<sup>1</sup>H} NMR (126 MHz, Chloroform-*d*)

2,2-dichloro-1-(4-chlorophenyl)ethan-1-one (**b7**)

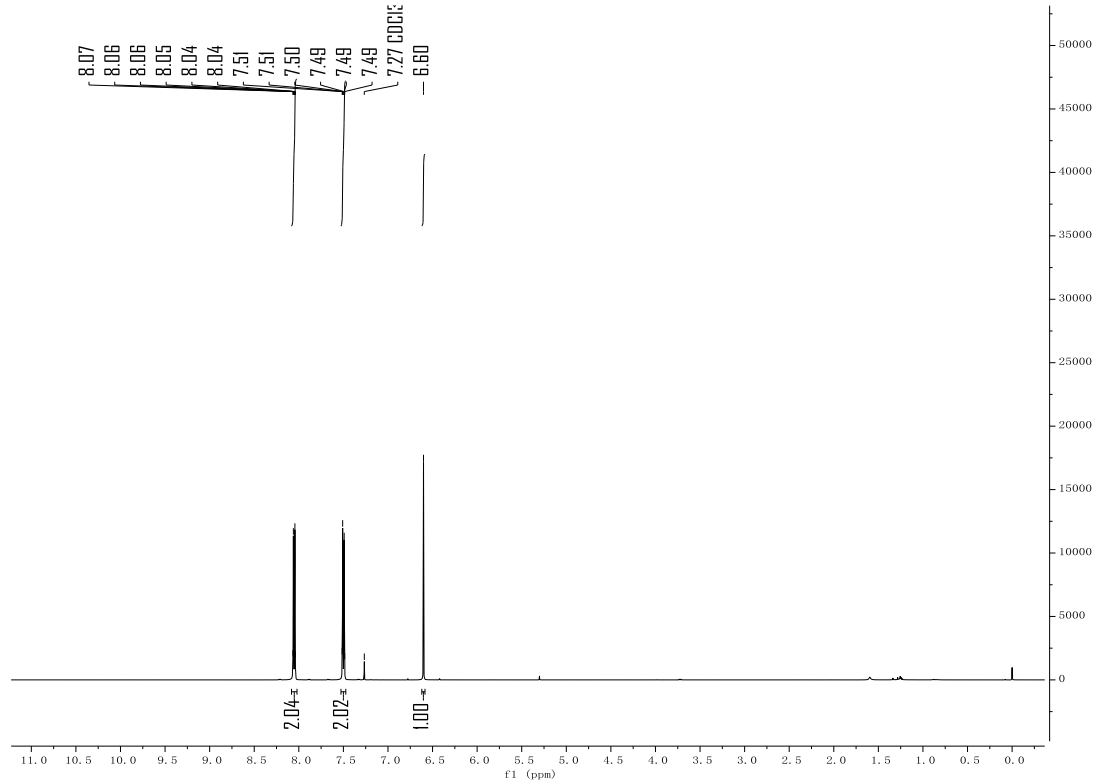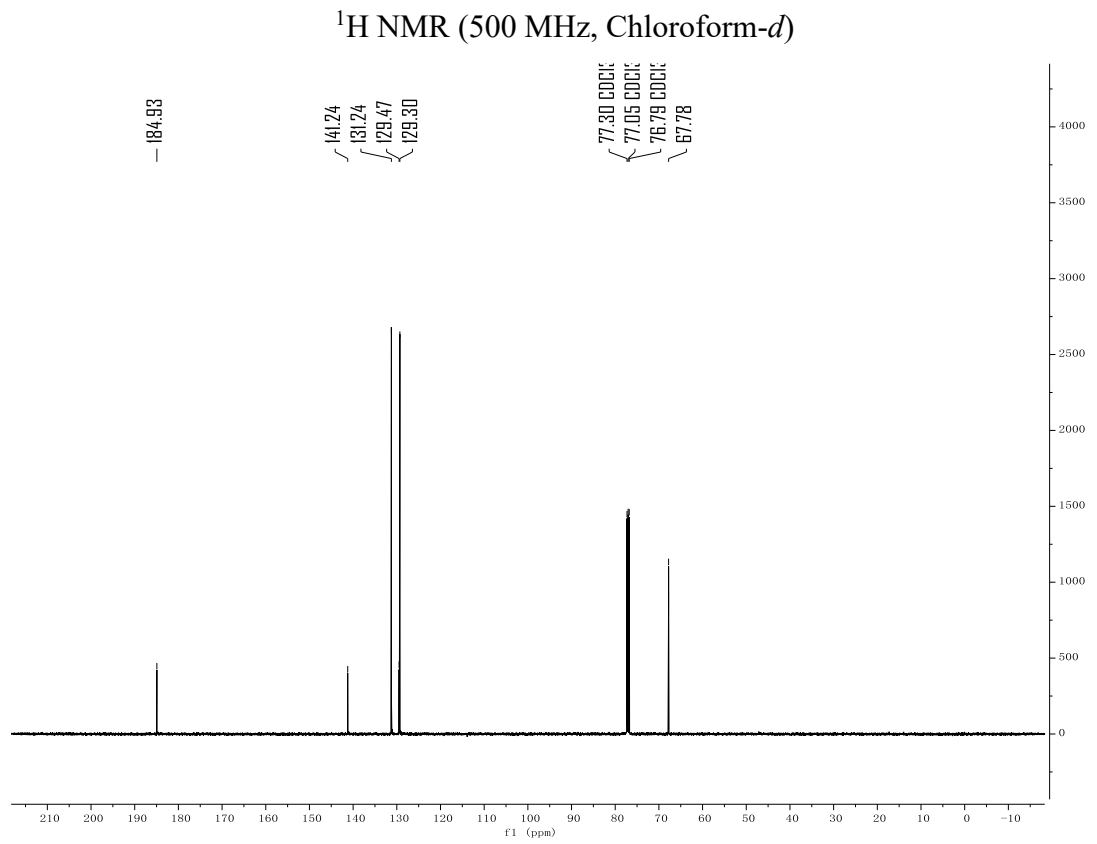

<sup>13</sup>C{<sup>1</sup>H} NMR (126 MHz, Chloroform-*d*)

1-(4-bromophenyl)-2,2-dichloroethan-1-one (**b8**)

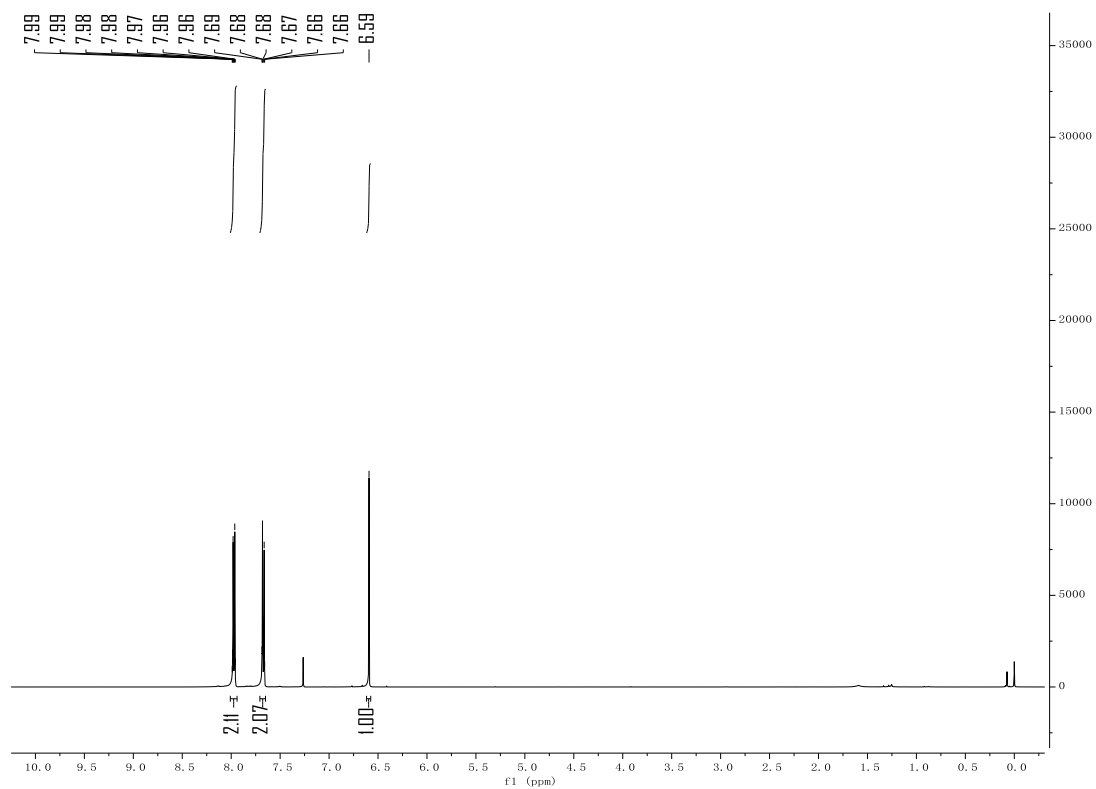

<sup>1</sup>H NMR (500 MHz, Chloroform-*d*)

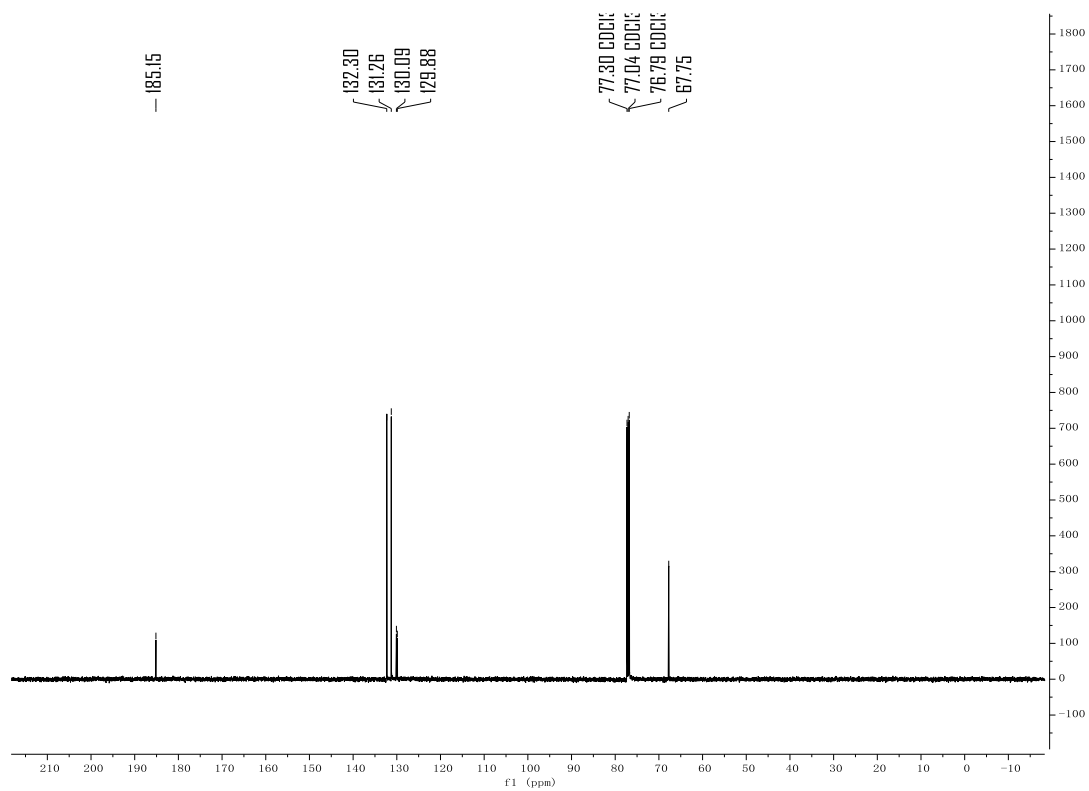

<sup>13</sup>C{<sup>1</sup>H} NMR (126 MHz, Chloroform-*d*)

methyl 4-(2,2-dichloroacetyl)benzoate (**b9**)

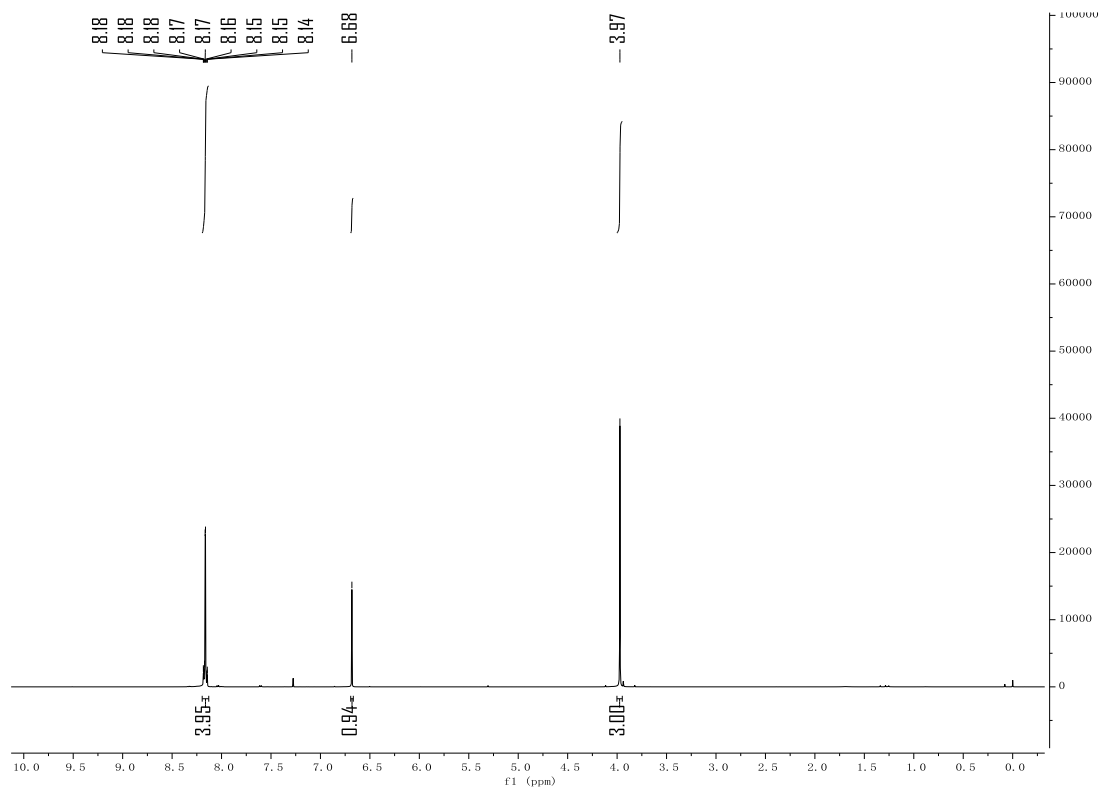

$^1\text{H}$  NMR (500 MHz, Chloroform-*d*)

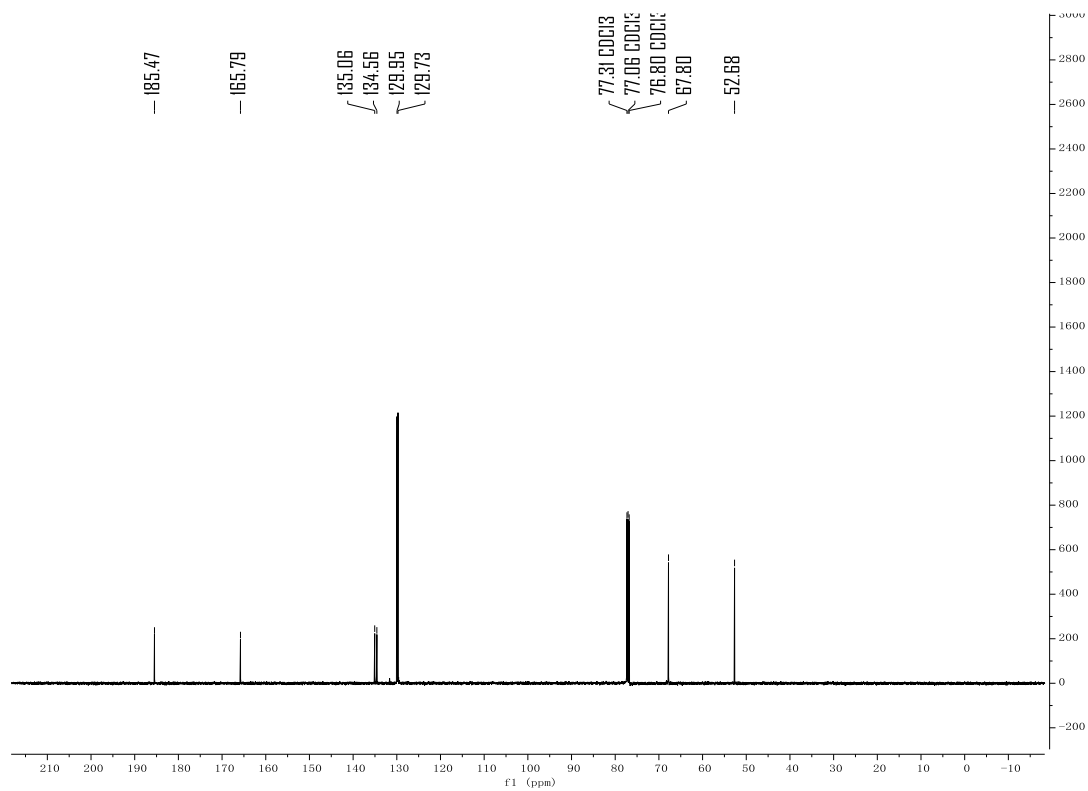

$^{13}\text{C}\{^1\text{H}\}$  NMR (126 MHz, Chloroform-*d*)

2,2-dichloro-1-(4-(trifluoromethyl)phenyl)ethan-1-one (**b10**)

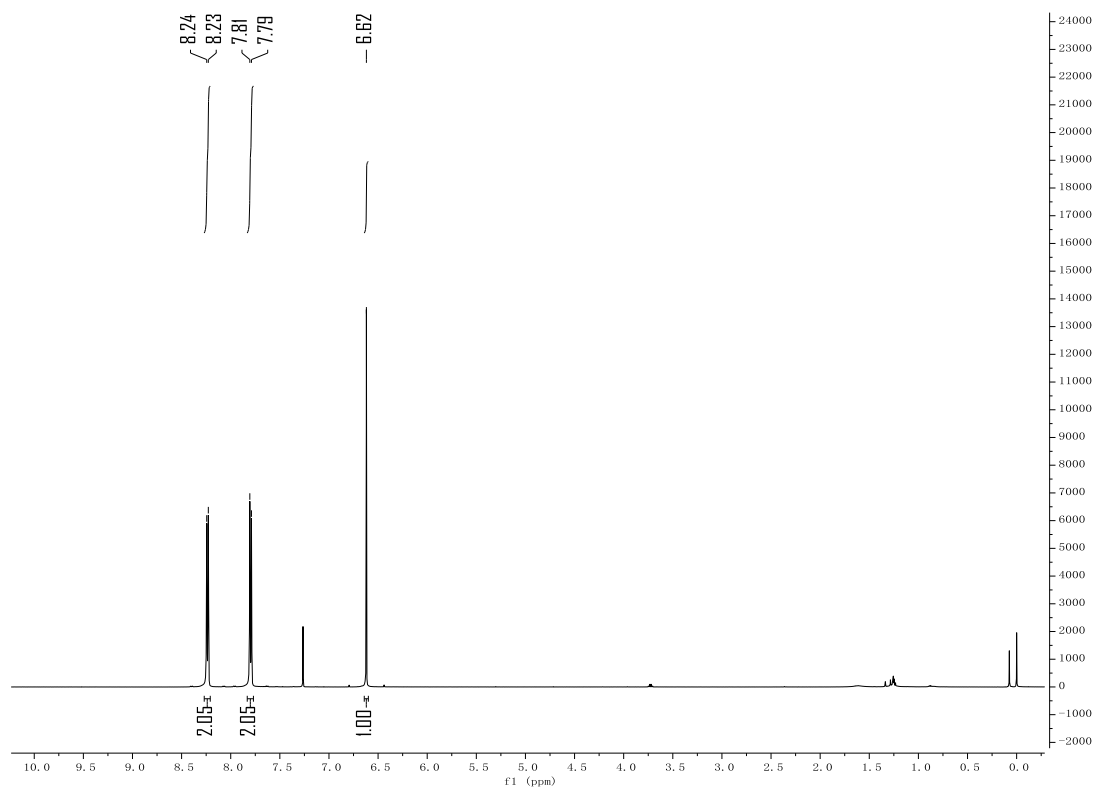

$^1\text{H}$  NMR (500 MHz, Chloroform-*d*)

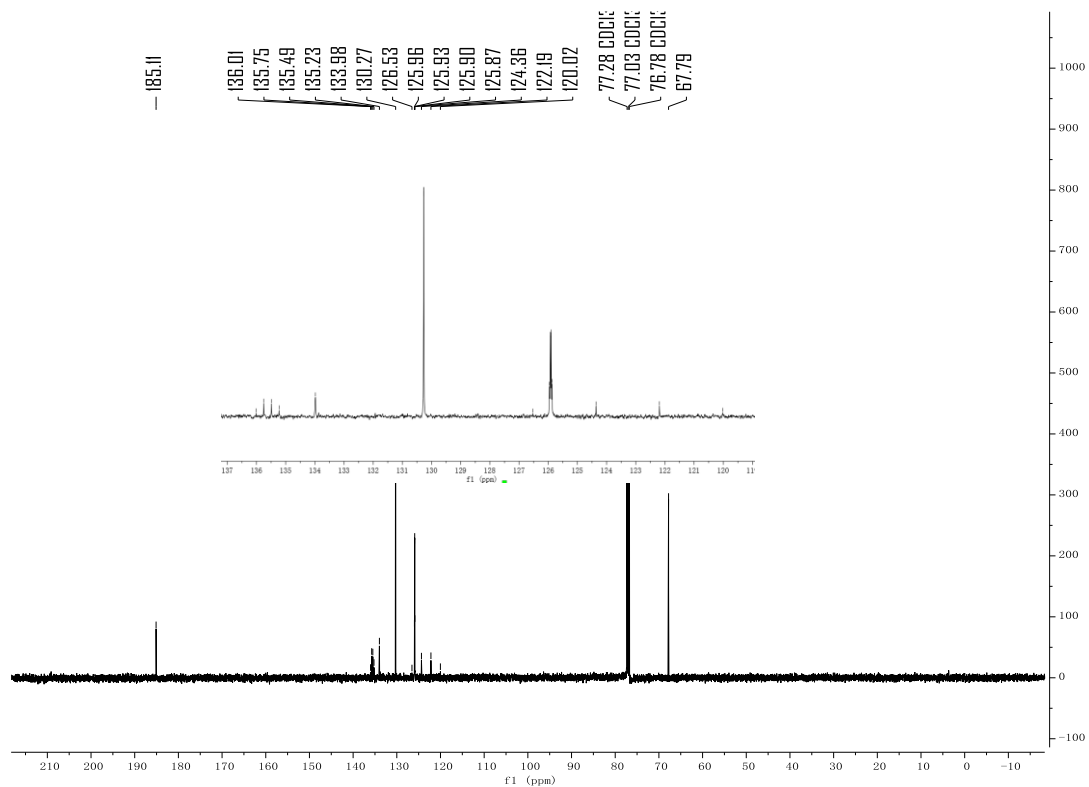

$^{13}\text{C}\{^1\text{H}\}$  NMR (126 MHz, Chloroform-*d*)

2,2-dichloro-1-(o-tolyl)ethan-1-one (**b11**)

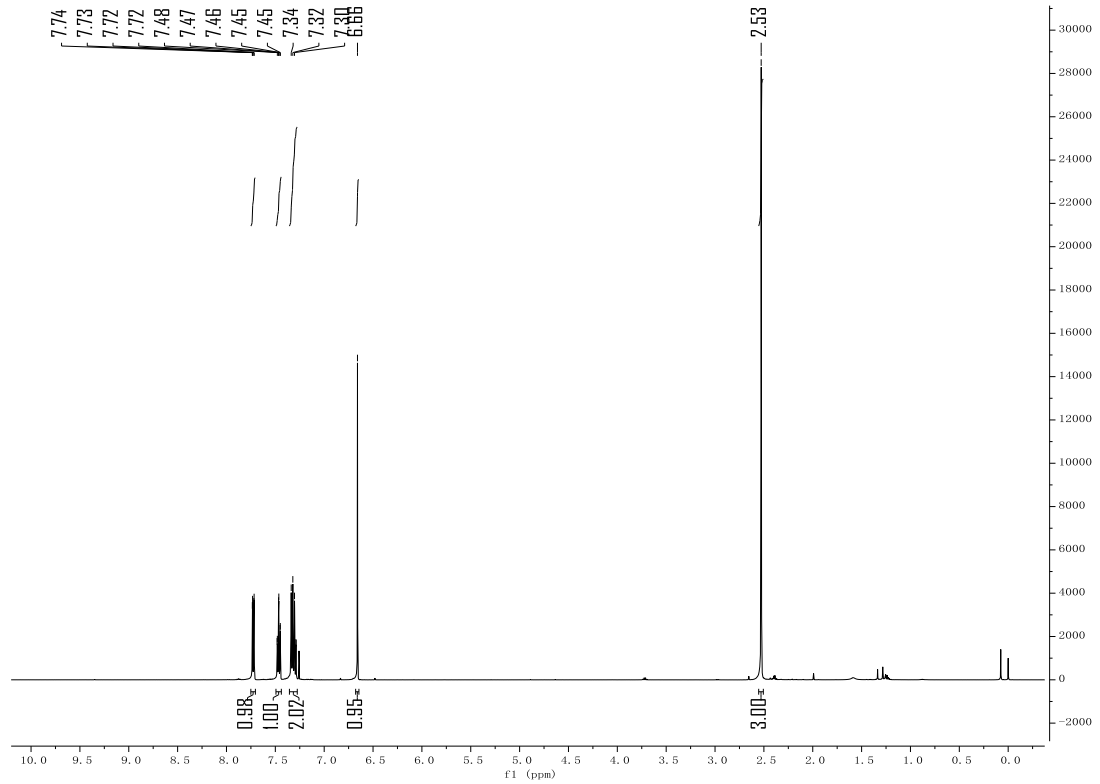

<sup>1</sup>H NMR (500 MHz, Chloroform-*d*)

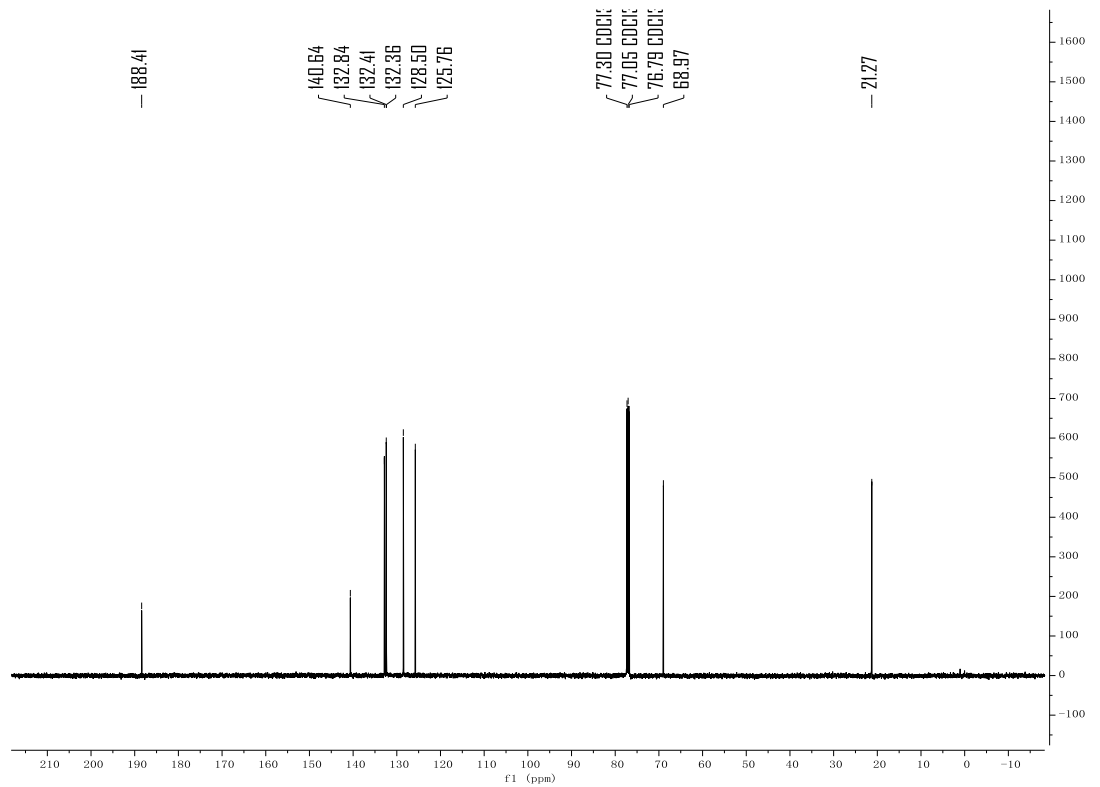

<sup>13</sup>C{<sup>1</sup>H} NMR (126 MHz, Chloroform-*d*)

2,2-dichloro-1-(2-chlorophenyl)ethan-1-one (**b12**)

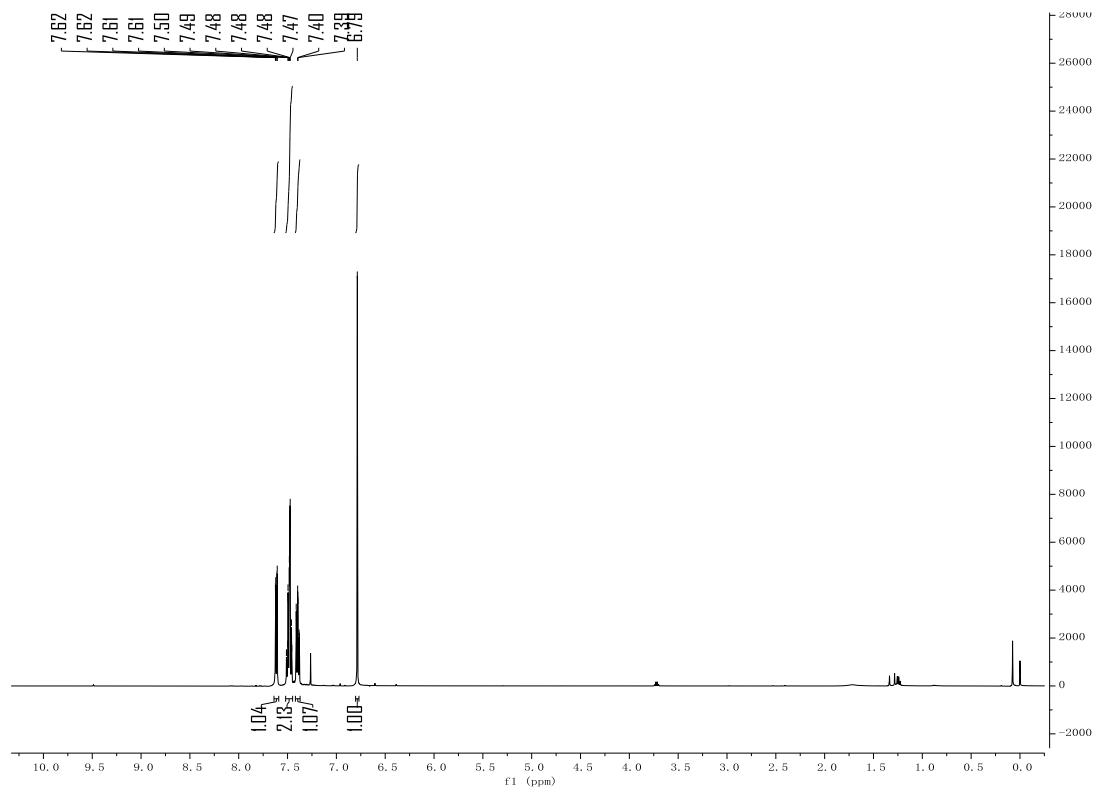

<sup>1</sup>H NMR (500 MHz, Chloroform-*d*)

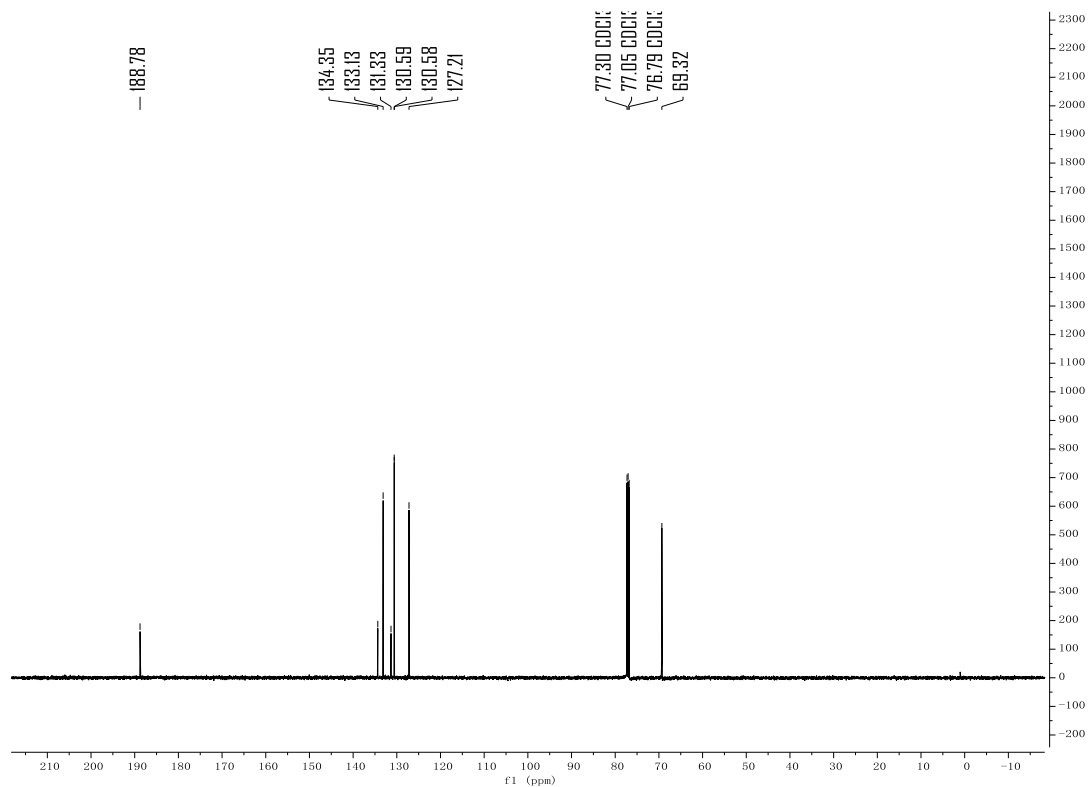

<sup>13</sup>C{<sup>1</sup>H} NMR (126 MHz, Chloroform-*d*)



2,2-dichloro-1-(naphthalen-1-yl)ethan-1-one (**b13**)

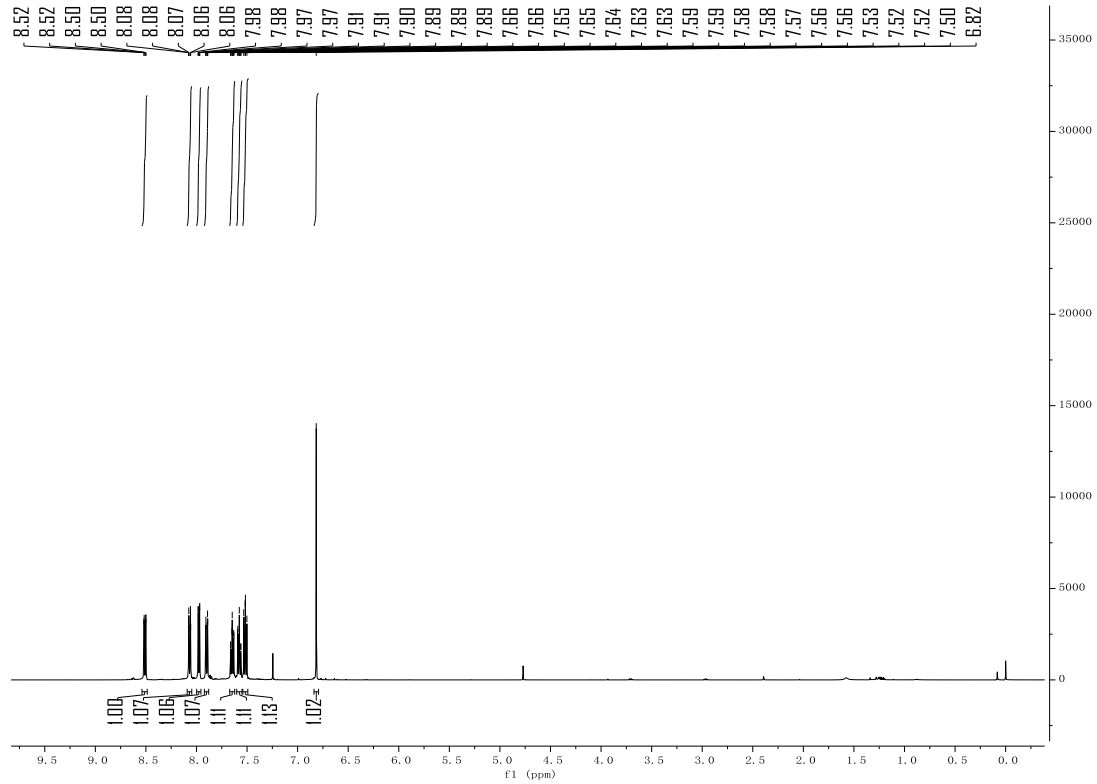

<sup>1</sup>H NMR (500 MHz, Chloroform-*d*)

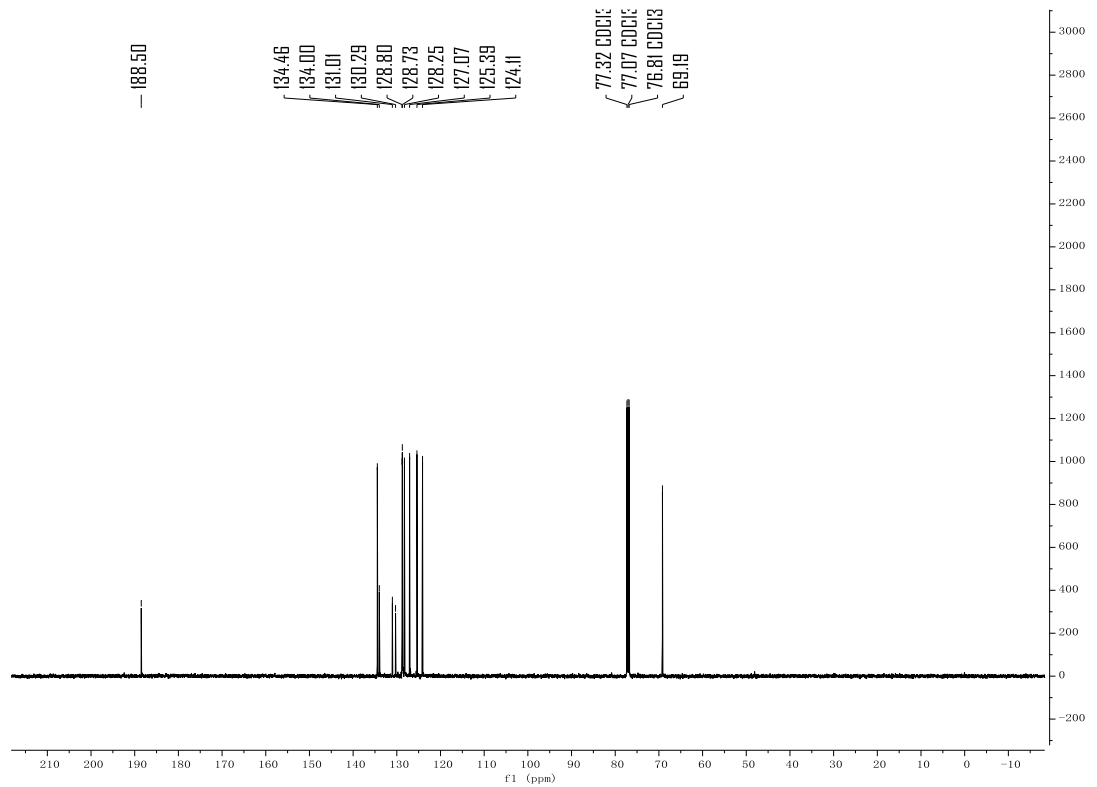

<sup>13</sup>C{<sup>1</sup>H} NMR (126 MHz, Chloroform-*d*)

2,2-dichloro-1-(naphthalen-2-yl)ethan-1-one (**b14**)

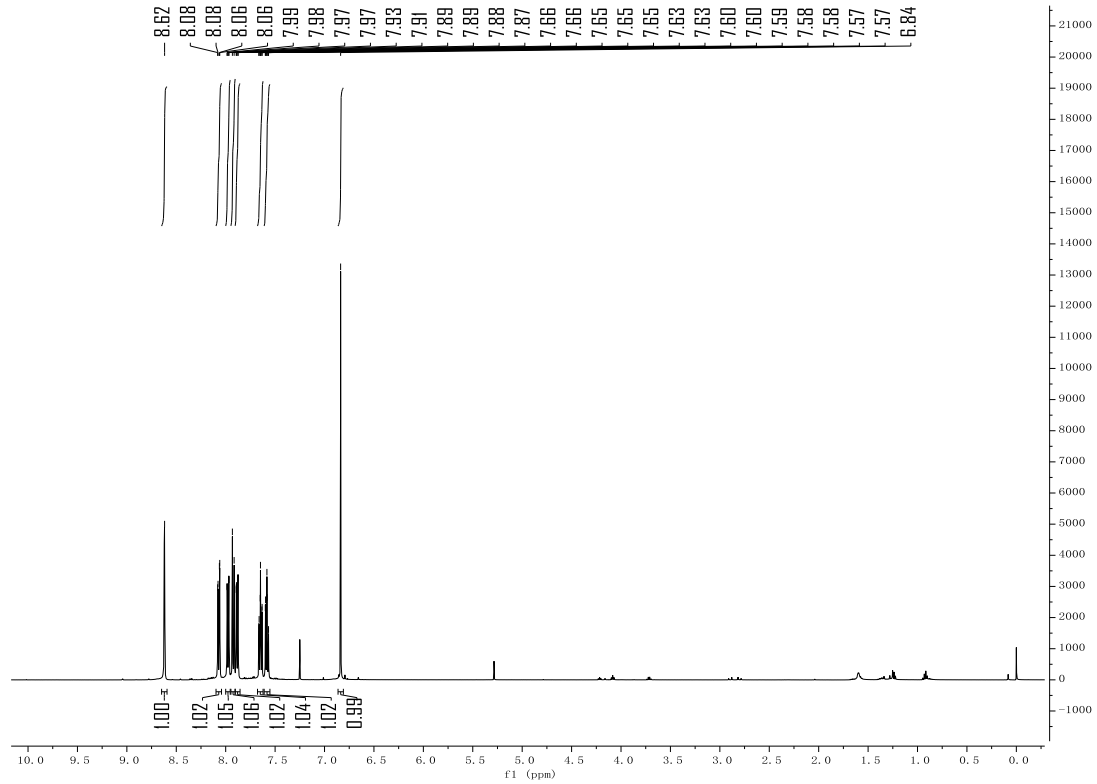

$^1\text{H}$  NMR (500 MHz, Chloroform-*d*)

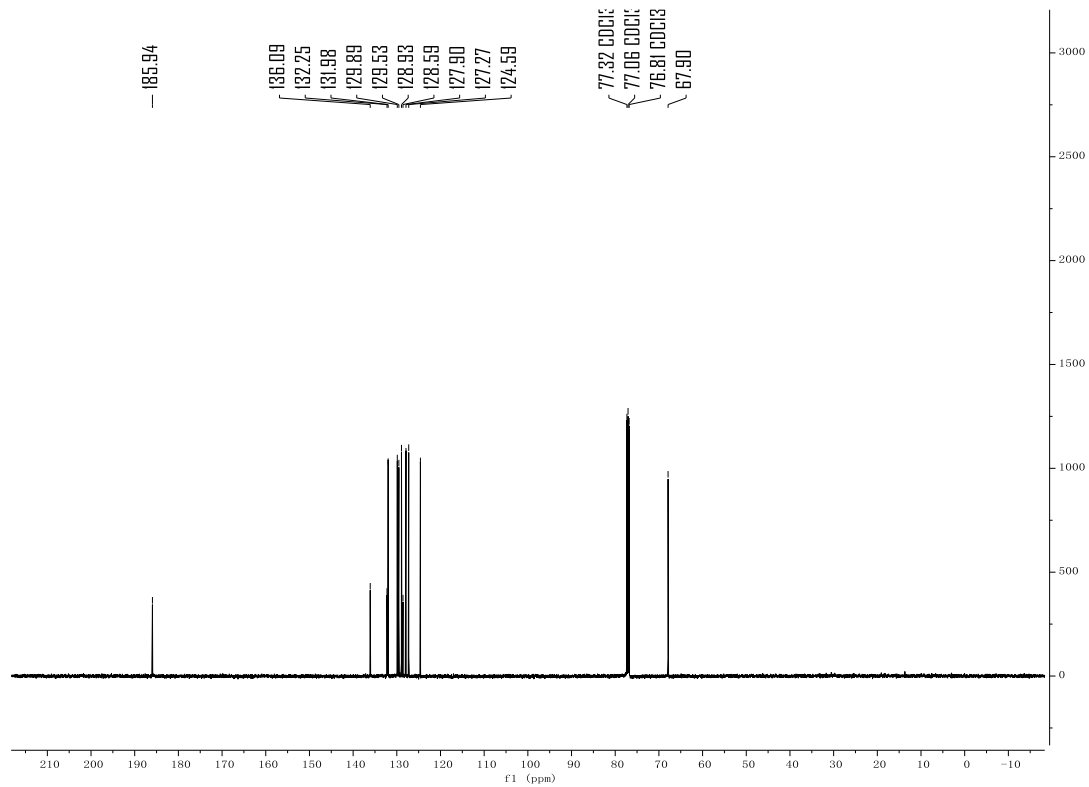

$^{13}\text{C}\{^1\text{H}\}$  NMR (126 MHz, Chloroform-*d*)

2,2-dichloro-1-(thiophen-2-yl)ethan-1-one (**b15**)

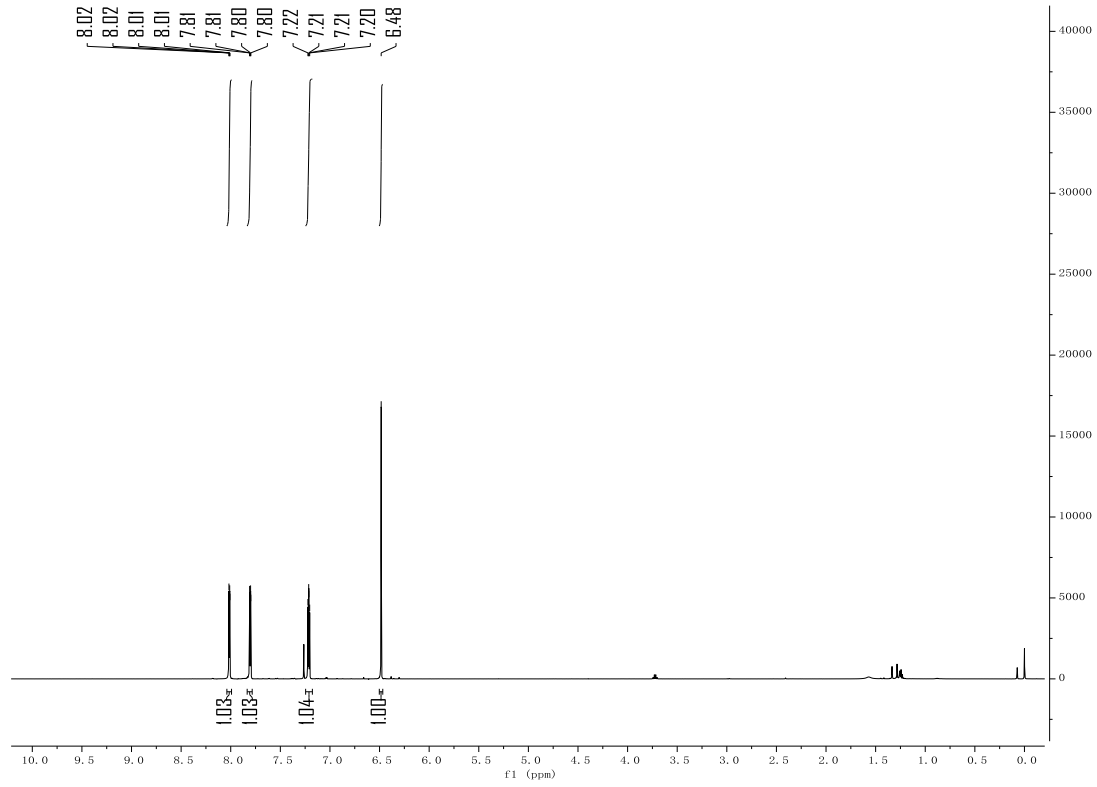

$^1\text{H}$  NMR (500 MHz, Chloroform-*d*)

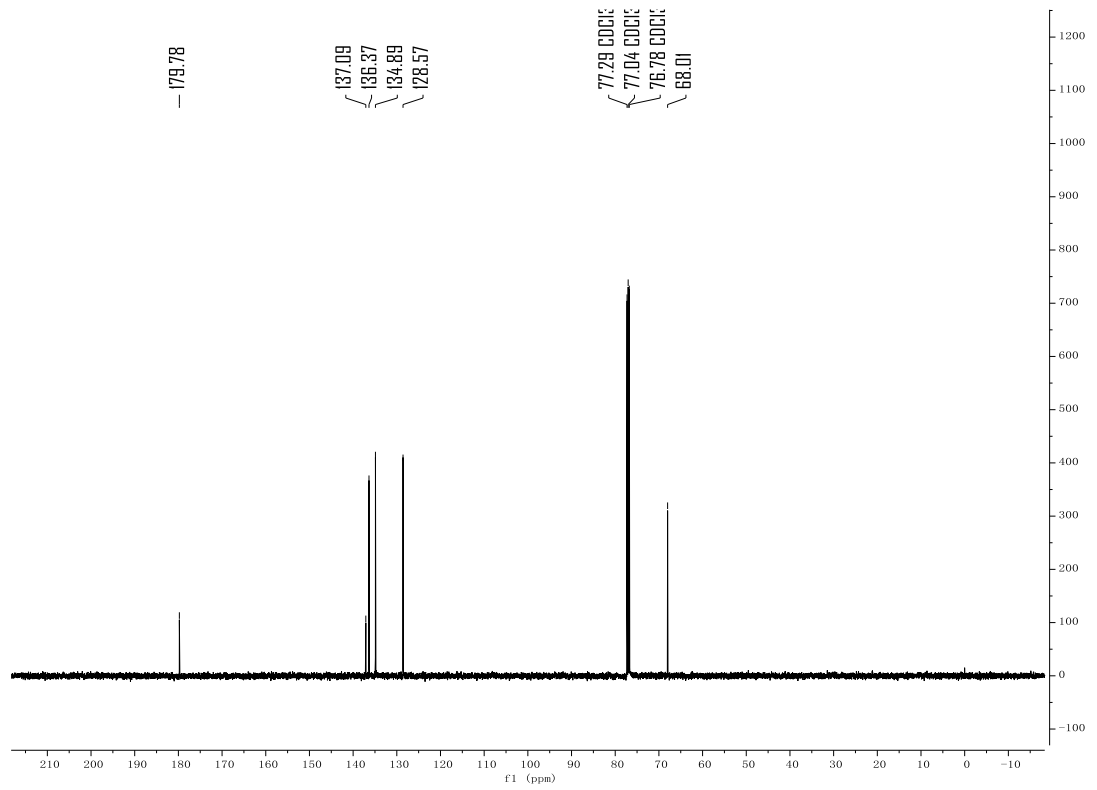

$^{13}\text{C}\{^1\text{H}\}$  NMR (126 MHz, Chloroform-*d*)

2-(4,4-dichloro-3-oxobutyl)isoindoline-1,3-dione (**b16**)

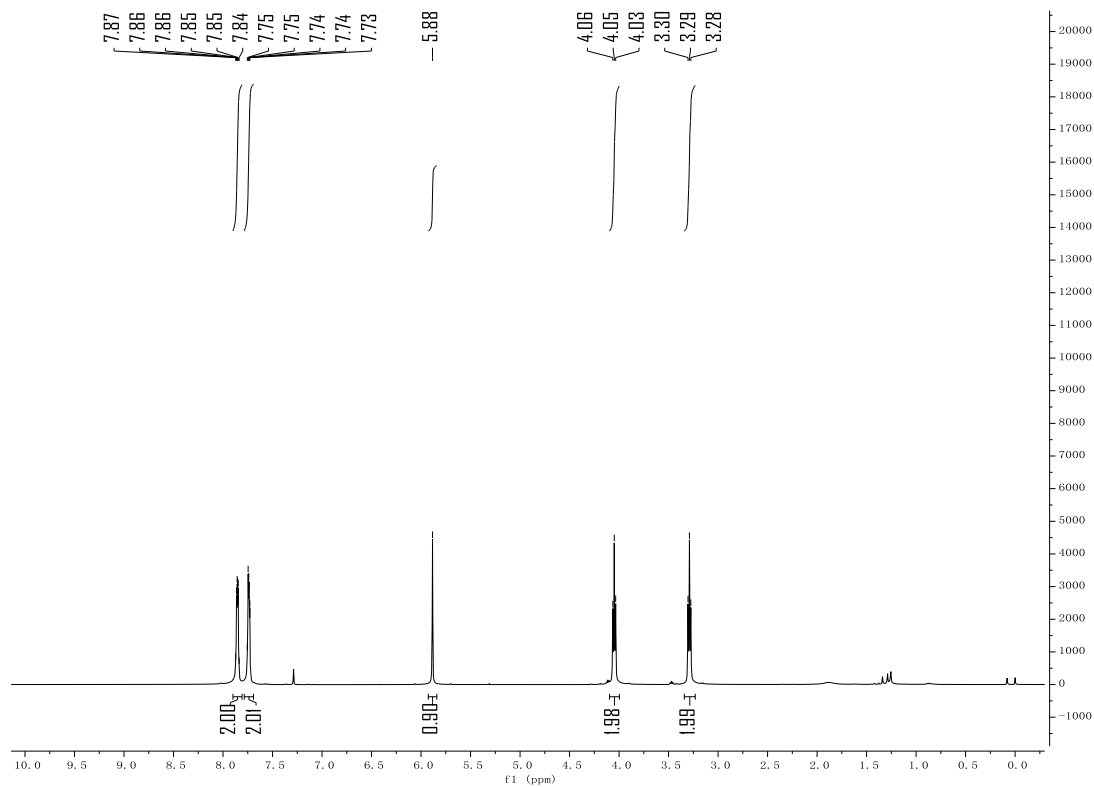

$^1\text{H}$  NMR (500 MHz, Chloroform-*d*)

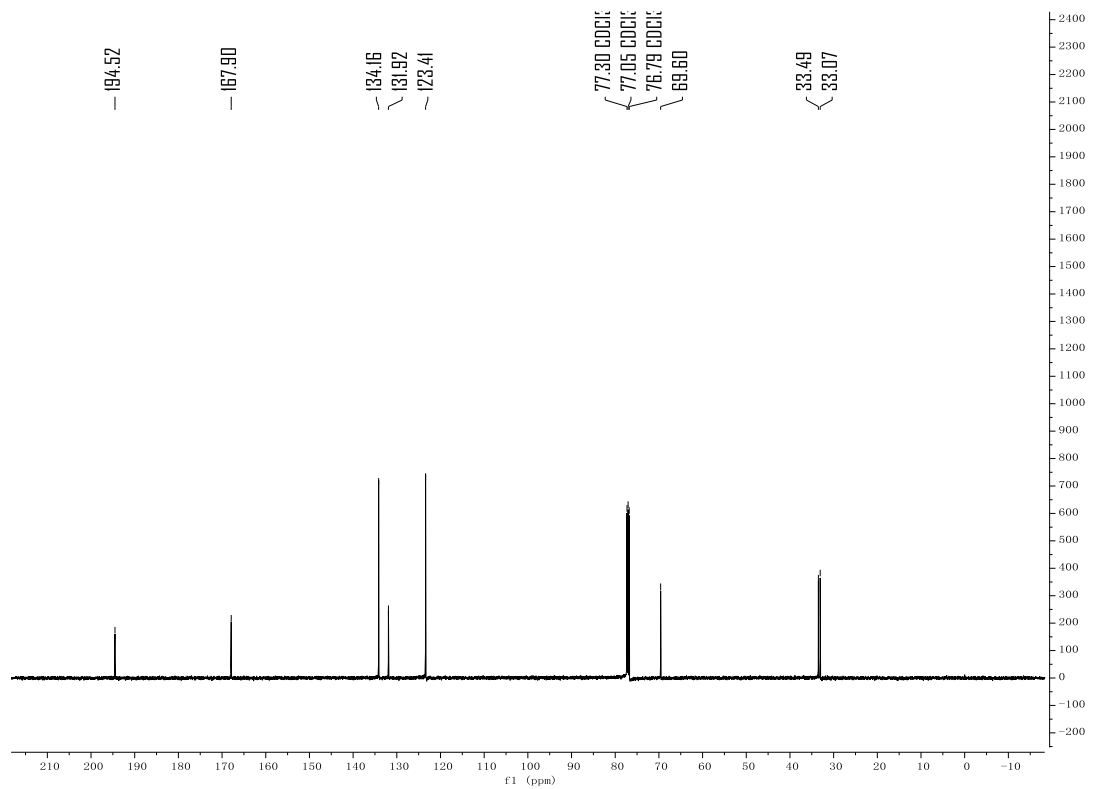

$^{13}\text{C}\{^1\text{H}\}$  NMR (126 MHz, Chloroform-*d*)

1,2-bis(4-(tert-butyl)phenyl)-2,2-dichloroethan-1-one (**b17**)

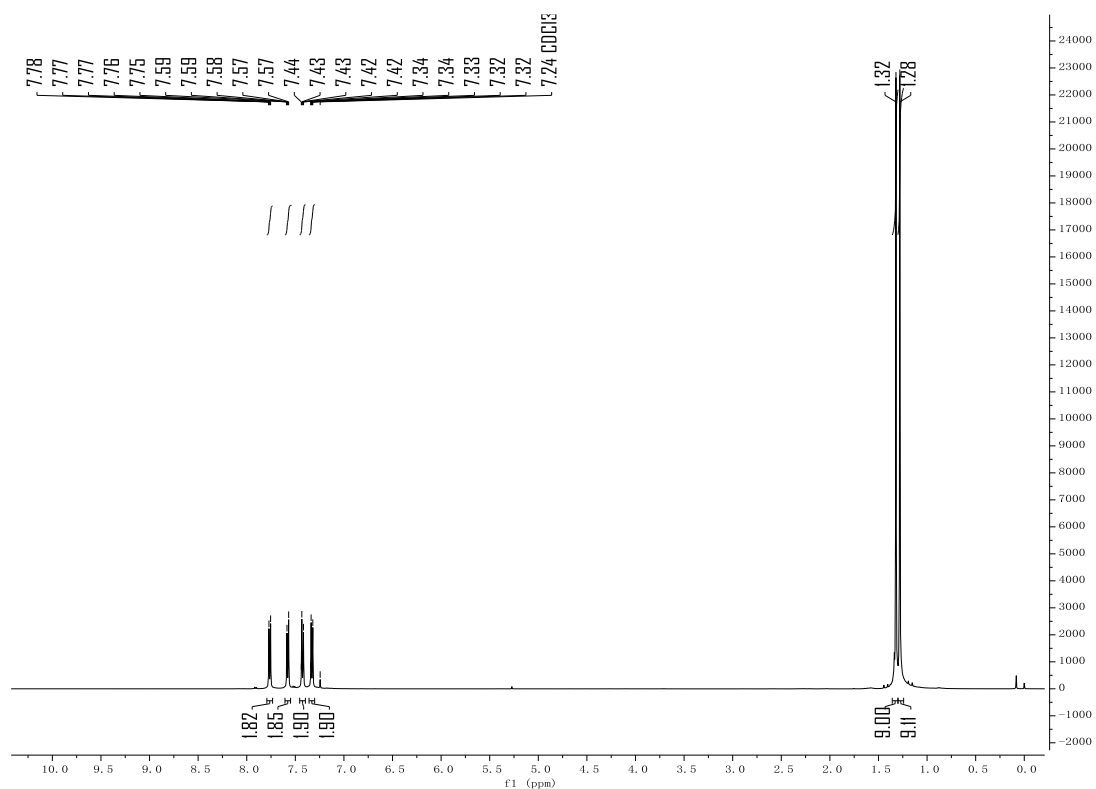

$^1\text{H}$  NMR (500 MHz, Chloroform-*d*)

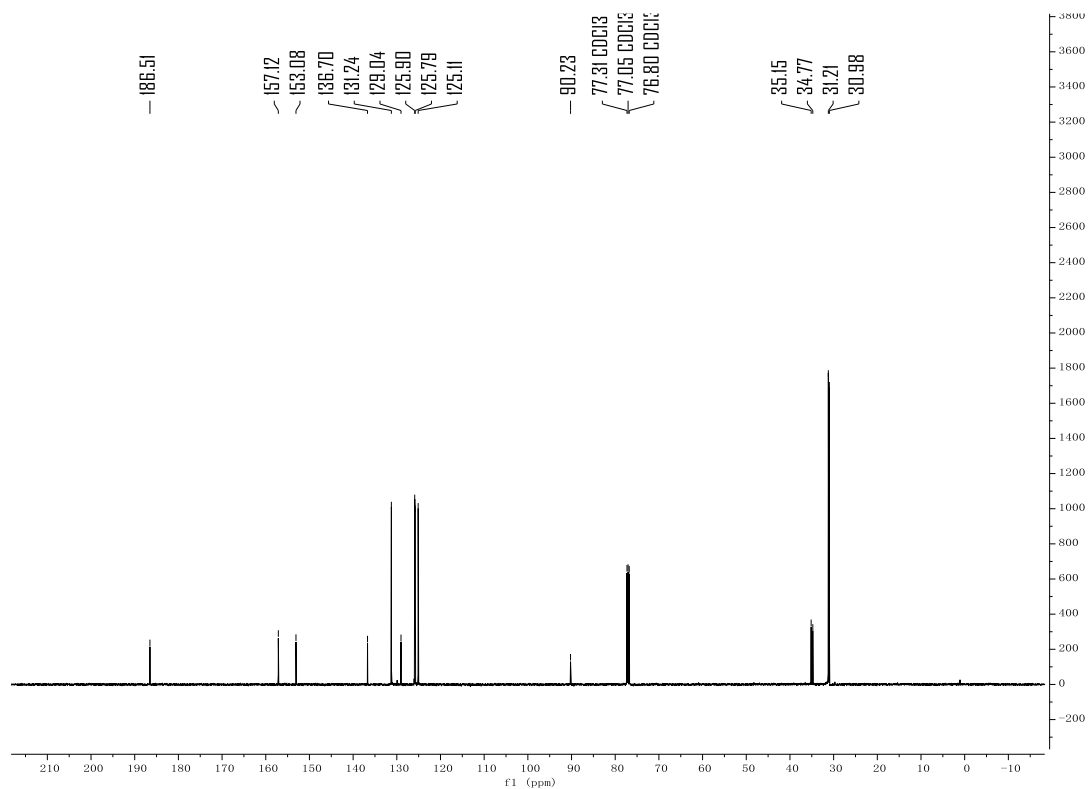

$^{13}\text{C}\{^1\text{H}\}$  NMR (126 MHz, Chloroform-*d*)

2,2-dichloro-1,2-diphenylethan-1-one (b18)

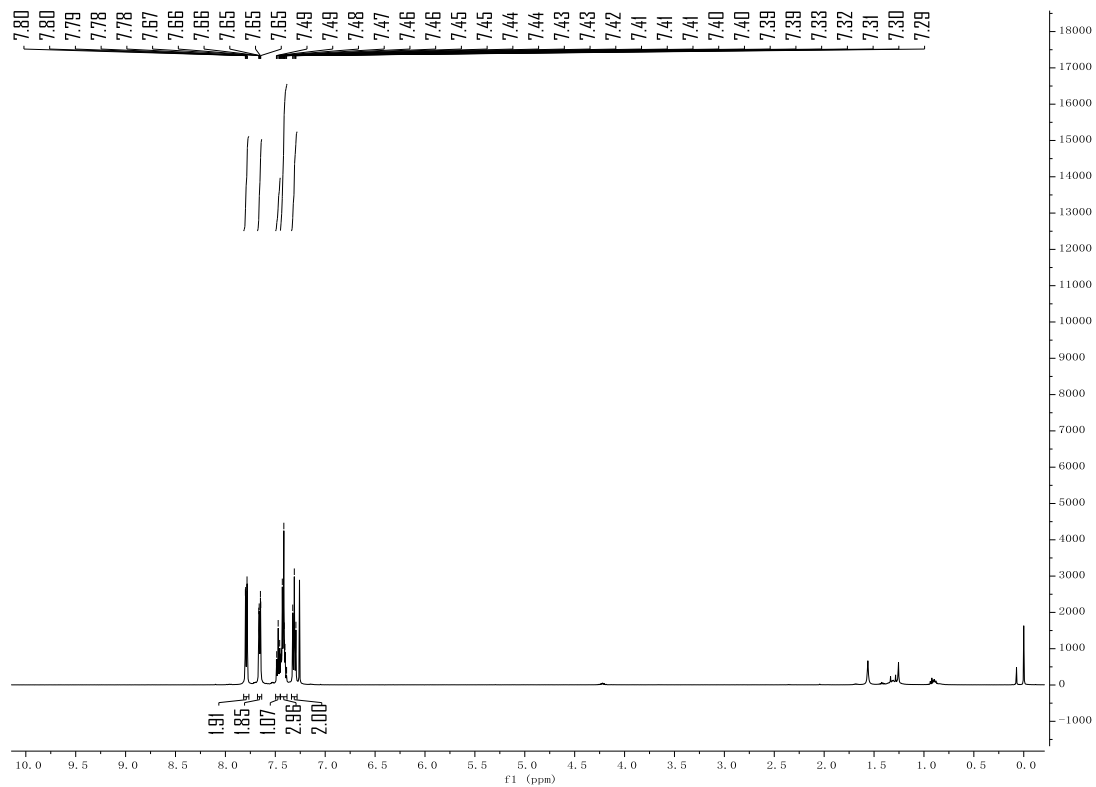

$^1\text{H}$  NMR (500 MHz, Chloroform-*d*)

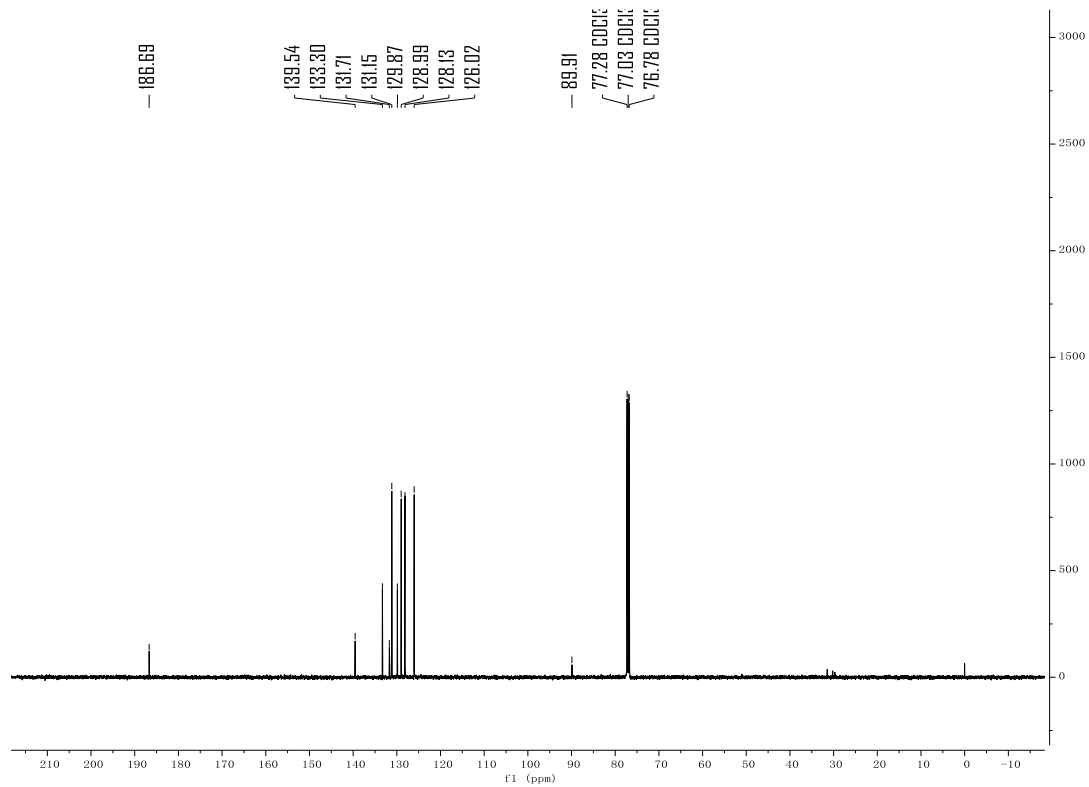

$^{13}\text{C}\{^1\text{H}\}$  NMR (126 MHz, Chloroform-*d*)

1,2-bis(4-bromophenyl)-2,2-dichloroethan-1-one (**b19**)

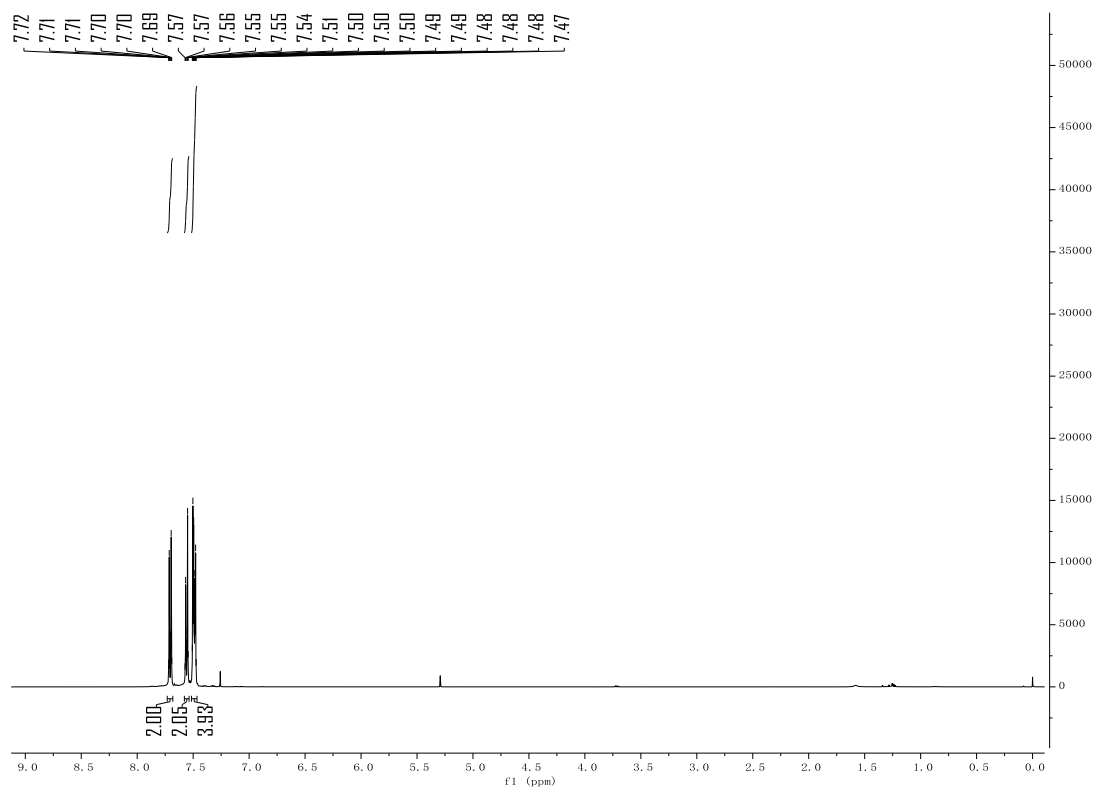

<sup>1</sup>H NMR (500 MHz, Chloroform-*d*)

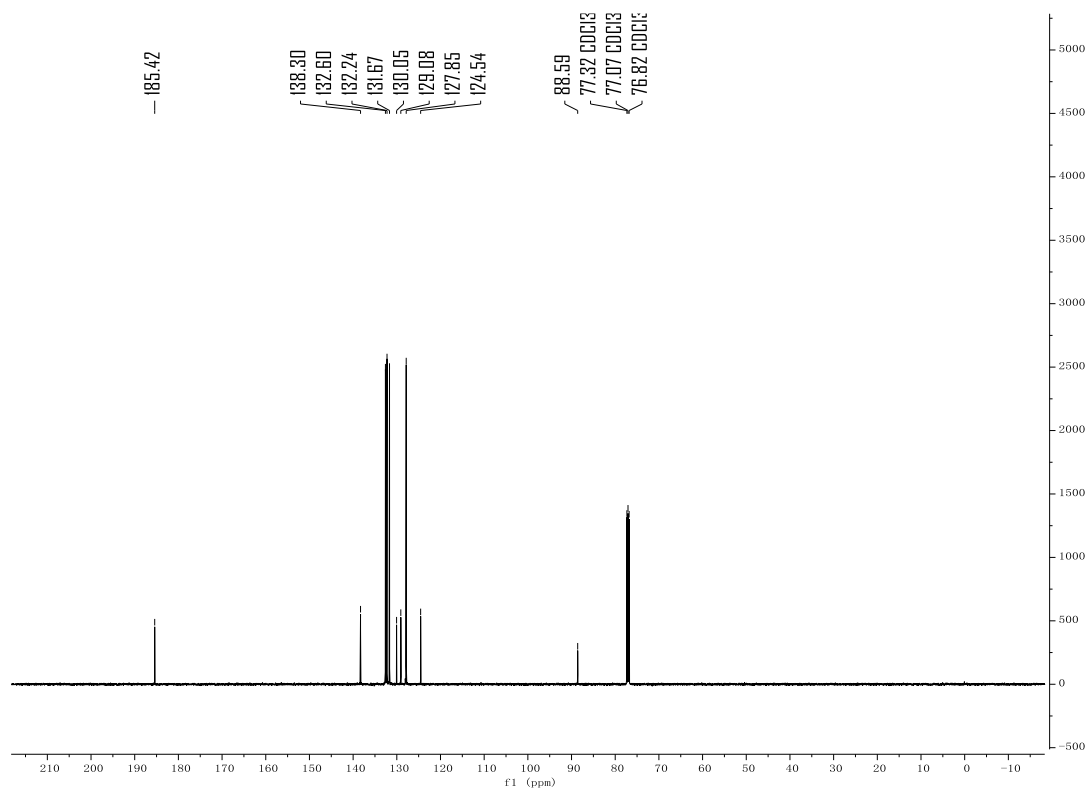

<sup>13</sup>C{<sup>1</sup>H} NMR (126 MHz, Chloroform-*d*)

2,2-dichloro-1,2-bis(4-(trifluoromethyl)phenyl)ethan-1-one (**b20**)

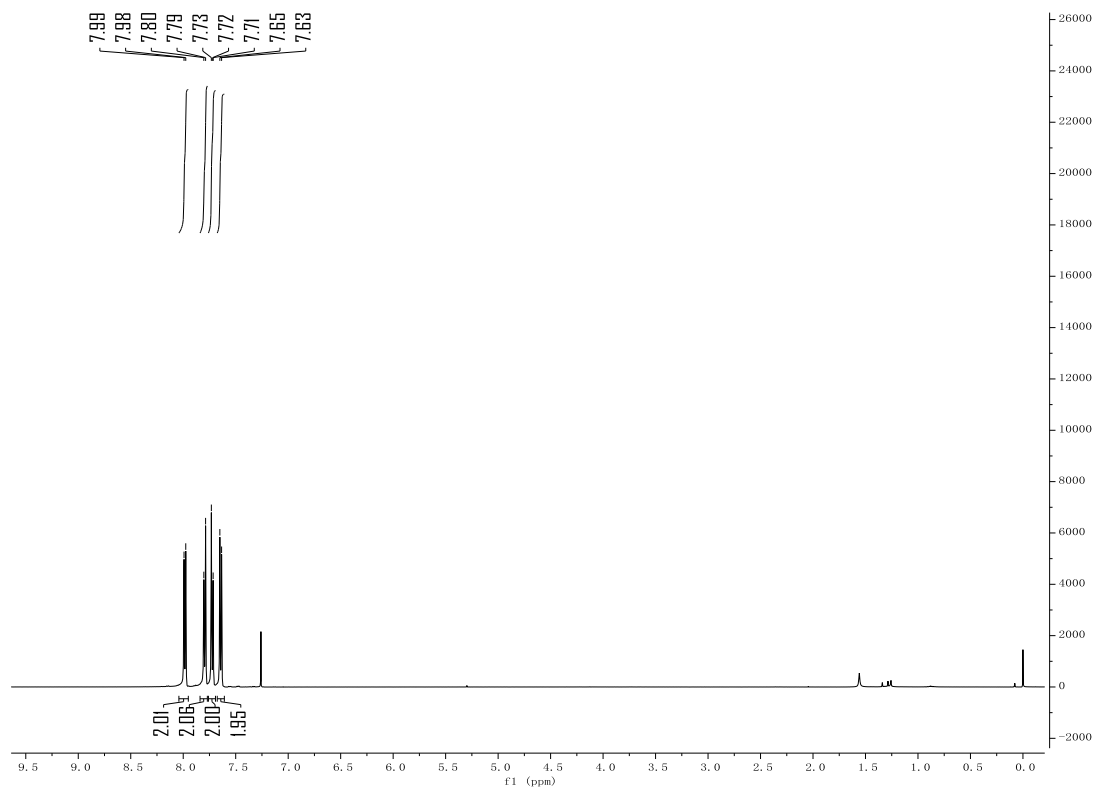

<sup>1</sup>H NMR (500 MHz, Chloroform-*d*)

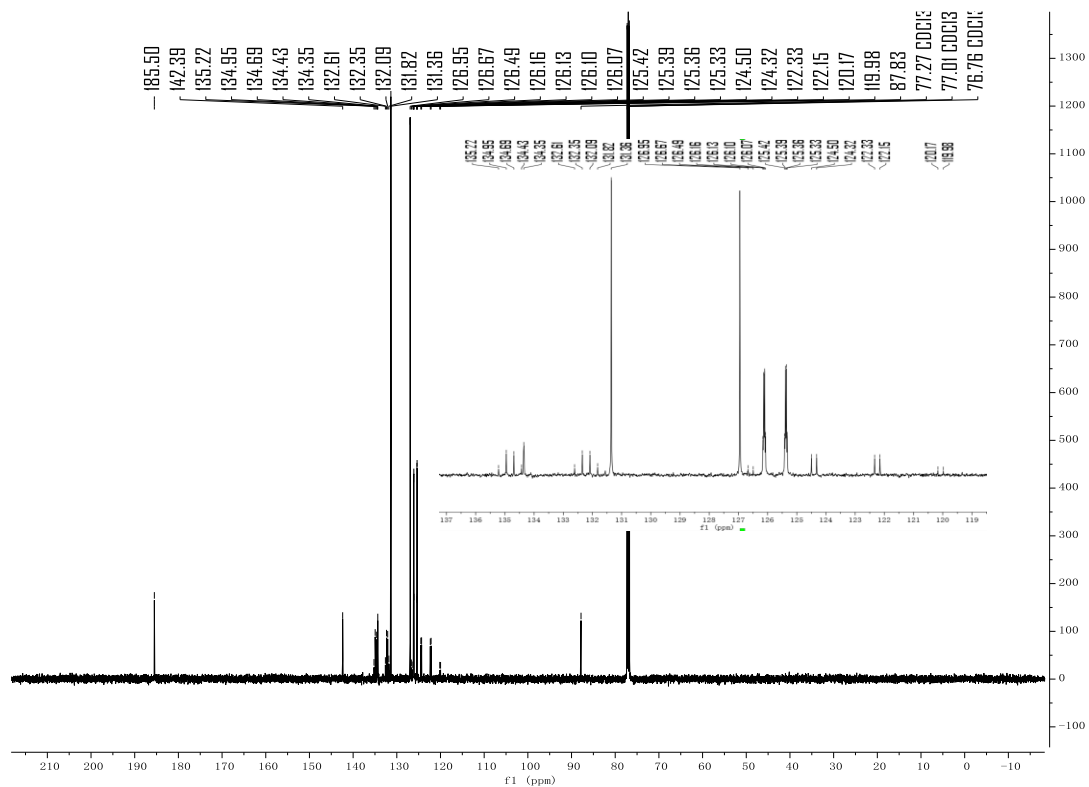

<sup>13</sup>C{<sup>1</sup>H} NMR (126 MHz, Chloroform-*d*)



2,2-dichloro-1,2-di-o-tolyethan-1-one (b21)

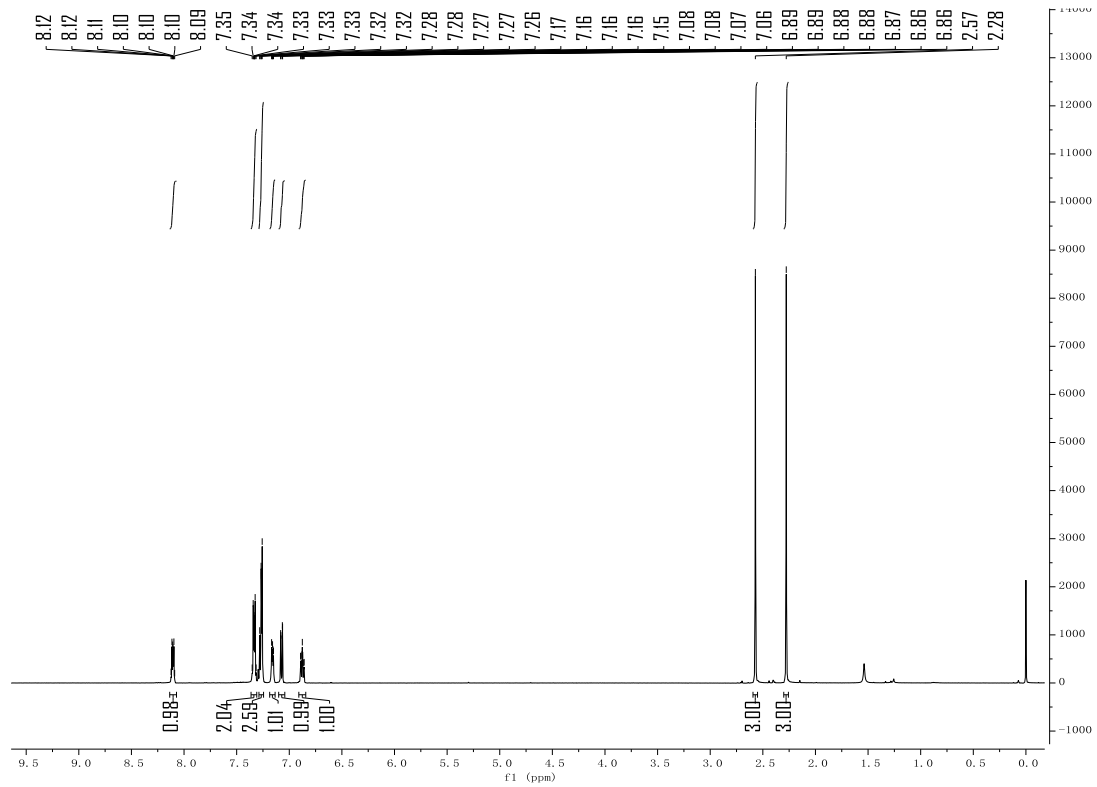

$^1\text{H}$  NMR (500 MHz, Chloroform-*d*)

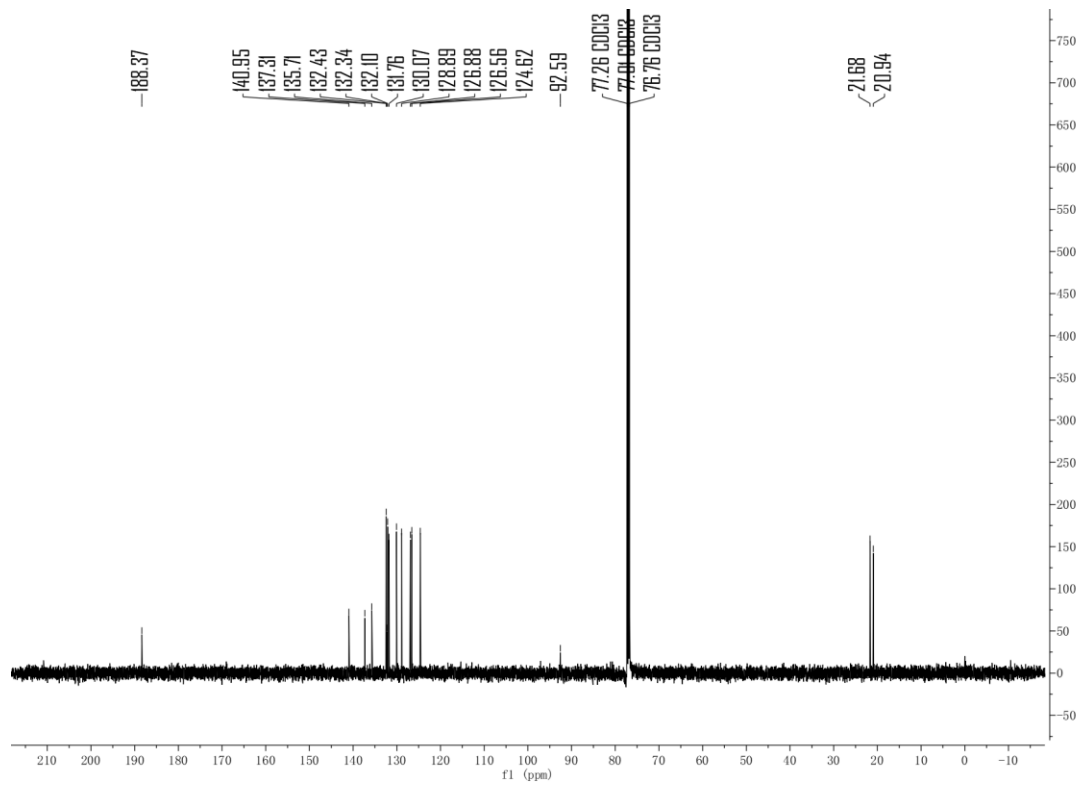

$^{13}\text{C}\{^1\text{H}\}$  NMR (126 MHz, Chloroform-*d*)

2,2-dichloro-1,2-bis(2-chlorophenyl)ethan-1-one (**b22**)

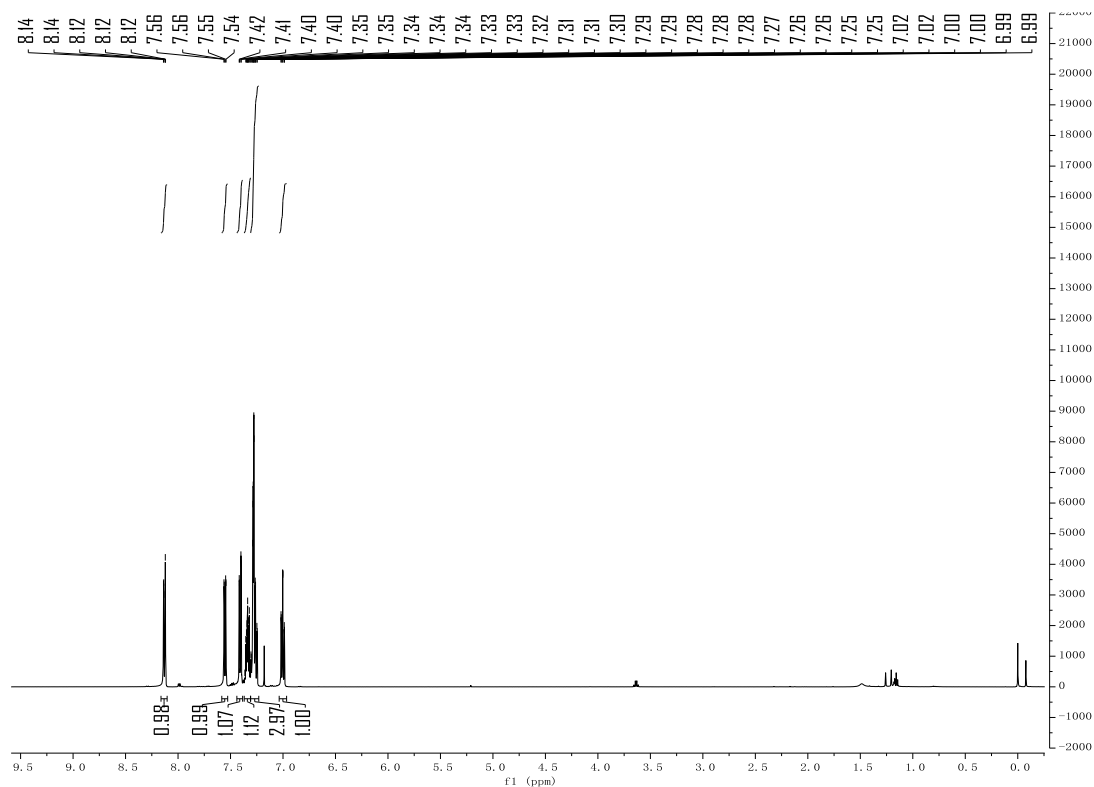

<sup>1</sup>H NMR (500 MHz, Chloroform-*d*)

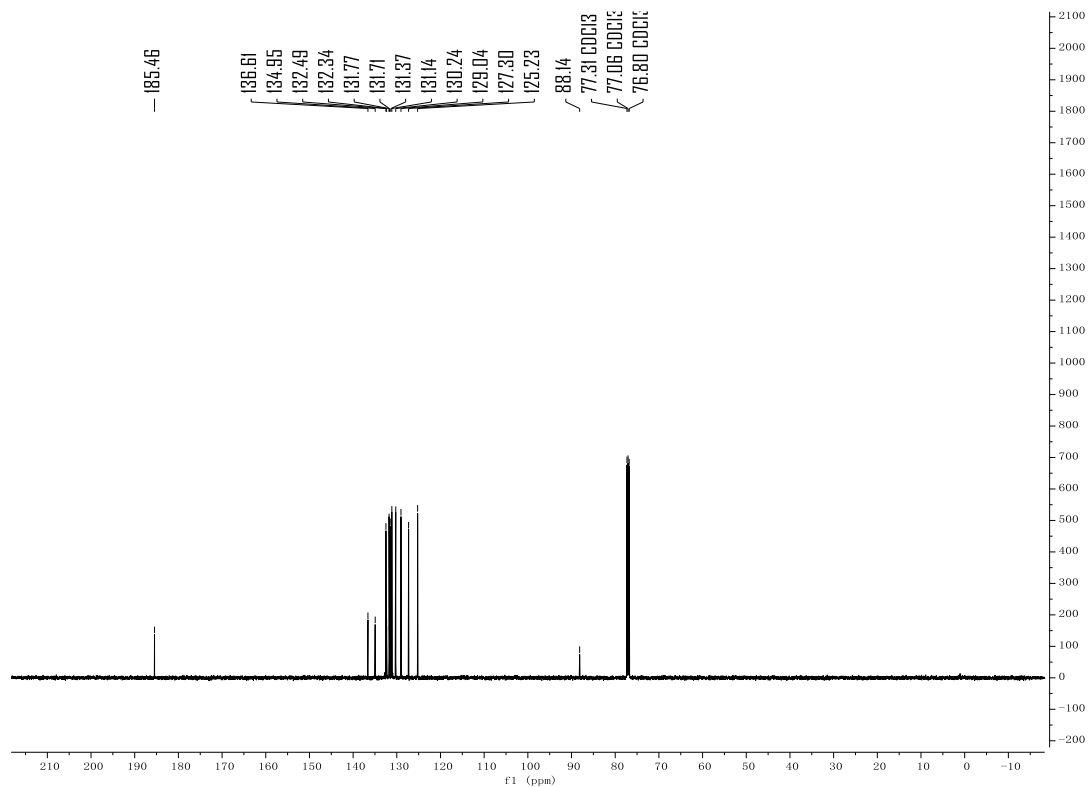

<sup>13</sup>C{<sup>1</sup>H} NMR (126 MHz, Chloroform-*d*)

2,2-dichloro-1-phenylpropan-1-one (b23)

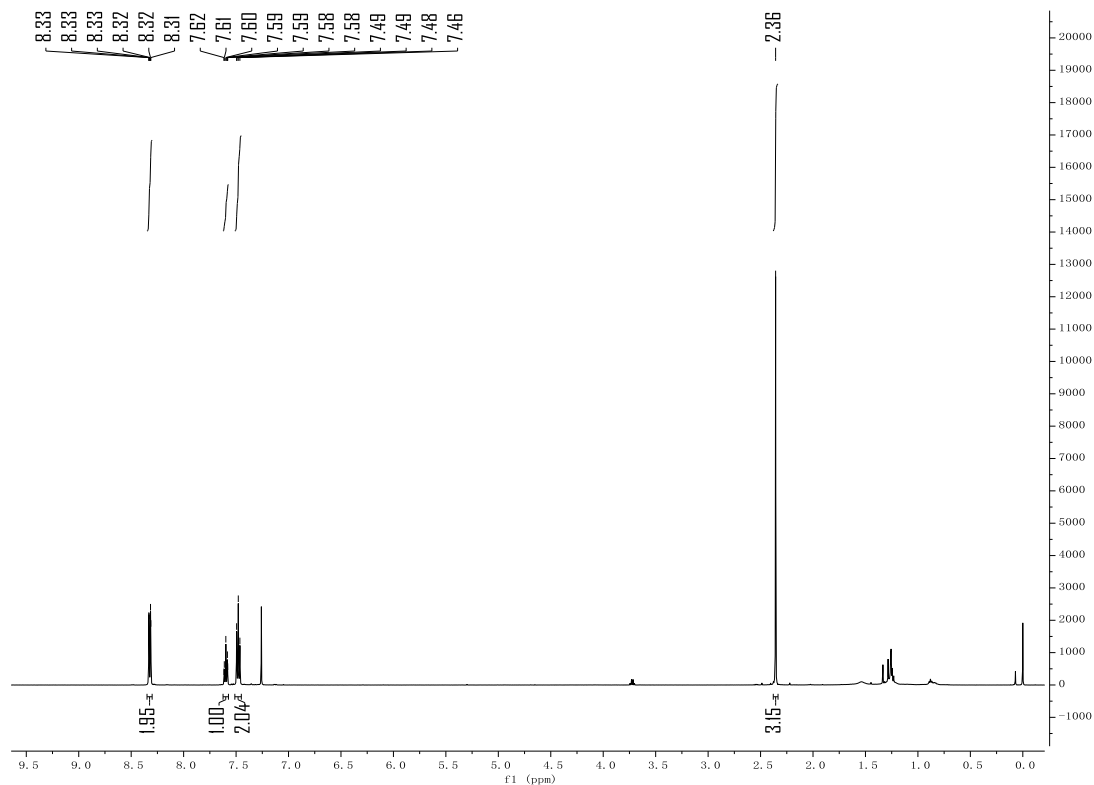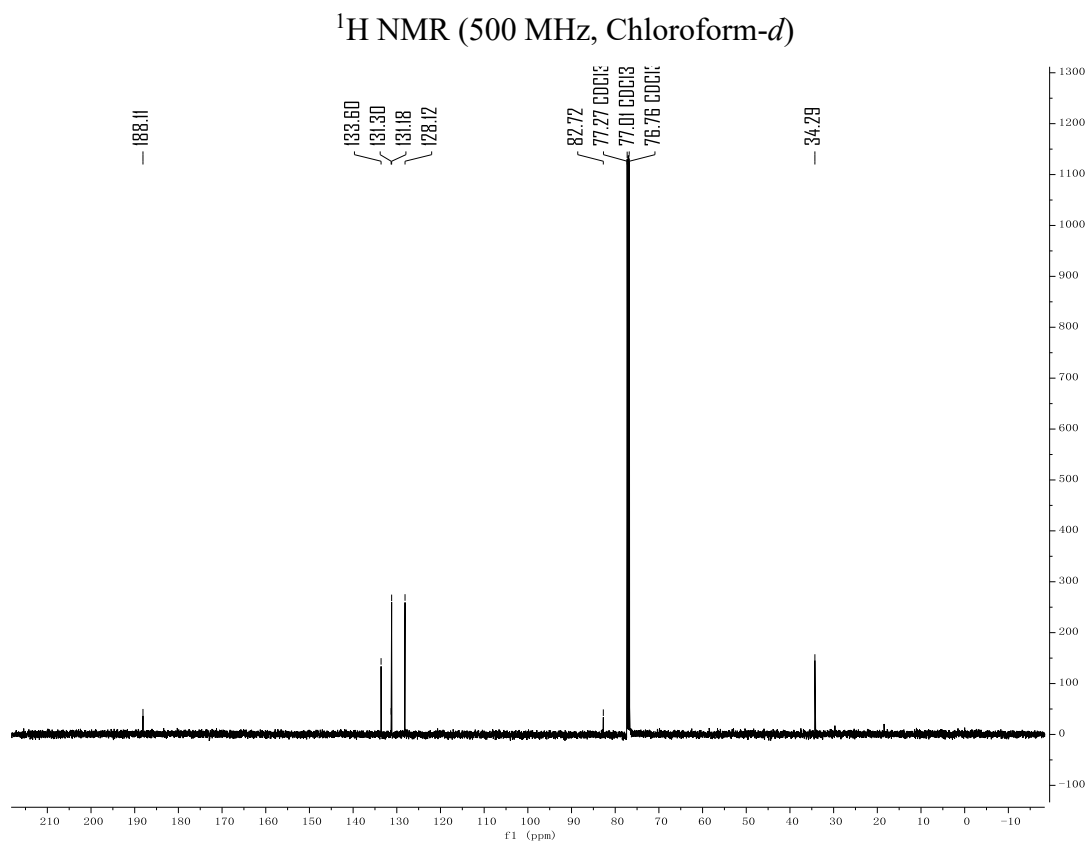

2,2-dichloro-1-phenylbutan-1-one (**b24**)

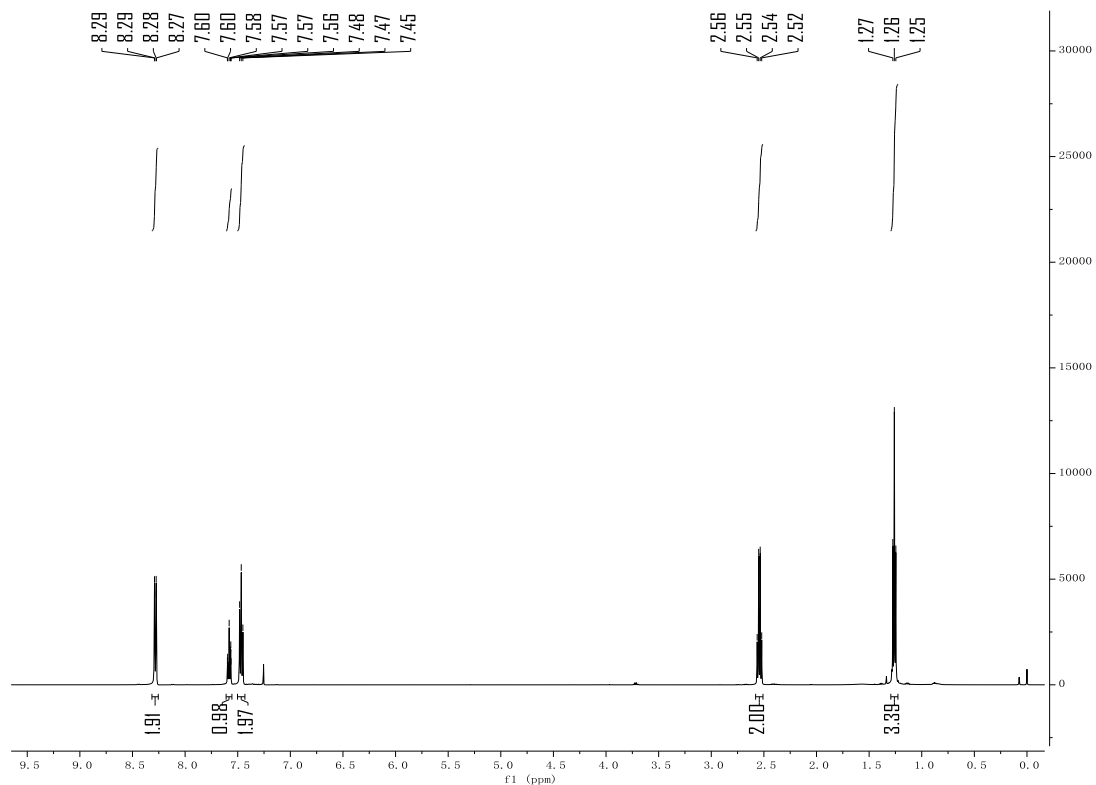

<sup>1</sup>H NMR (500 MHz, Chloroform-*d*)

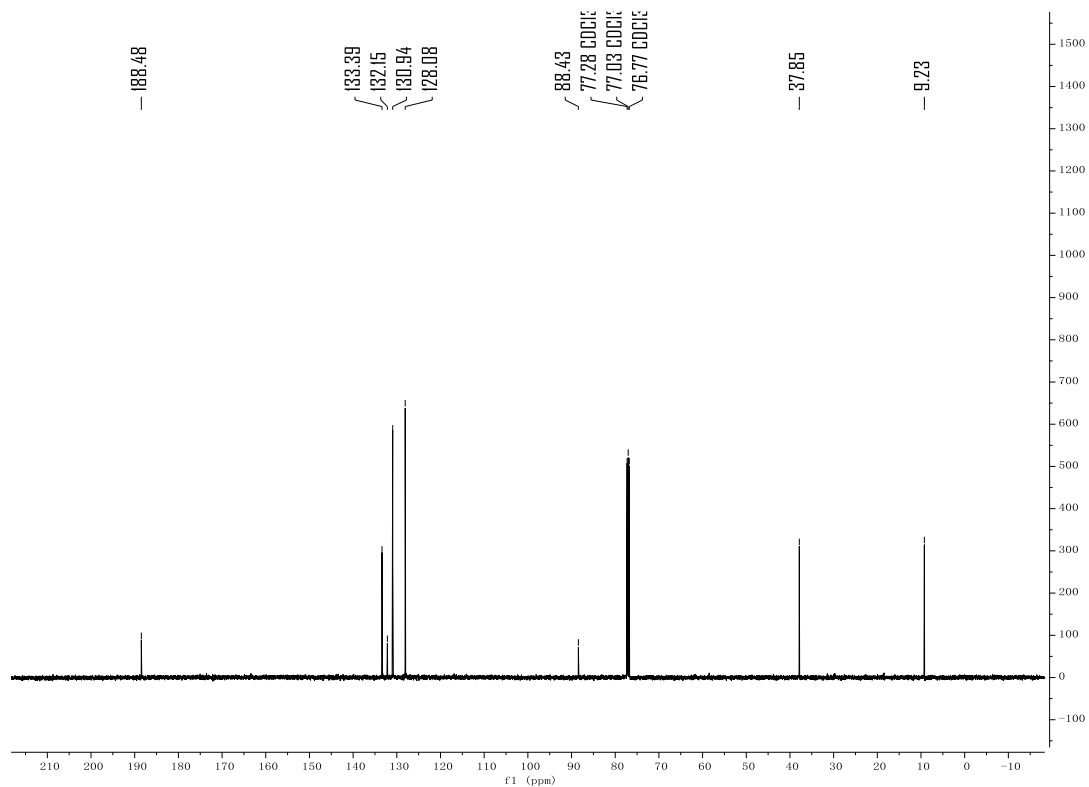

<sup>13</sup>C{<sup>1</sup>H} NMR (126 MHz, Chloroform-*d*)

2,2-dichloro-1-phenylpentan-1-one (**b25**)

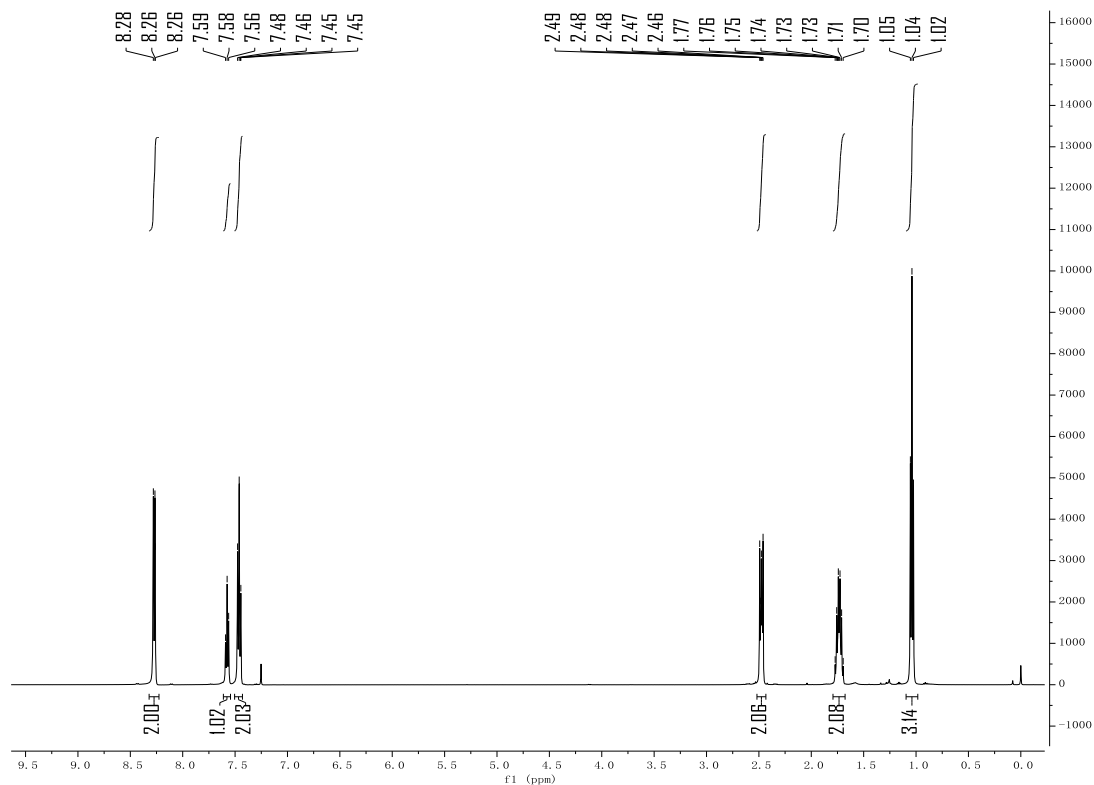

$^1\text{H}$  NMR (500 MHz, Chloroform-*d*)

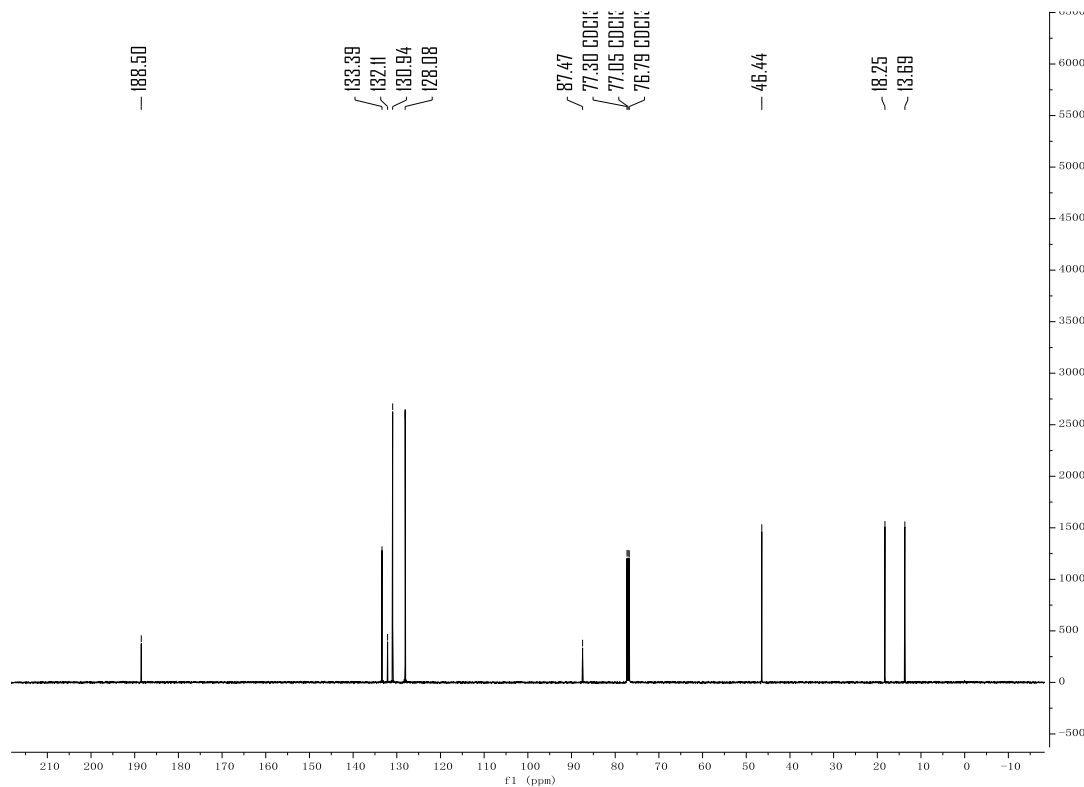

$^{13}\text{C}\{^1\text{H}\}$  NMR (126 MHz, Chloroform-*d*)

2,2-dichloro-1-phenylhexan-1-one (b26)

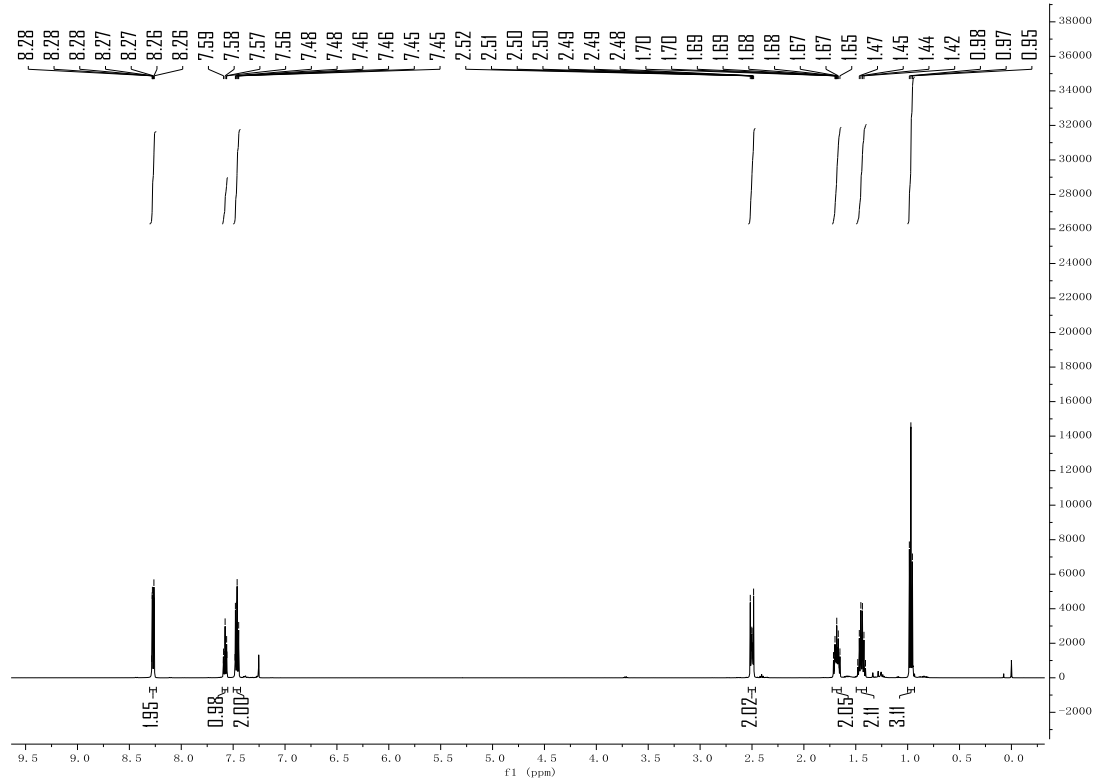

$^1\text{H}$  NMR (500 MHz, Chloroform-*d*)

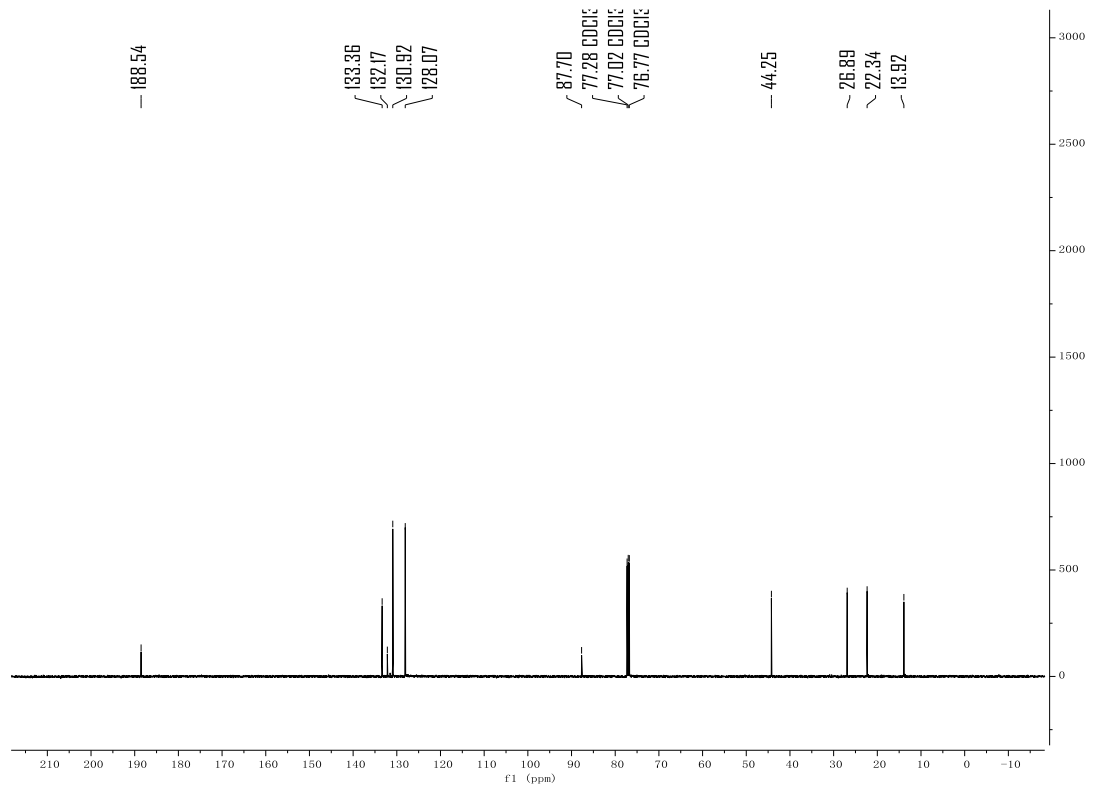

$^{13}\text{C}\{^1\text{H}\}$  NMR (126 MHz, Chloroform-*d*)

2,2-dichloro-3-hydroxy-1-phenylpropan-1-one (**b27**)

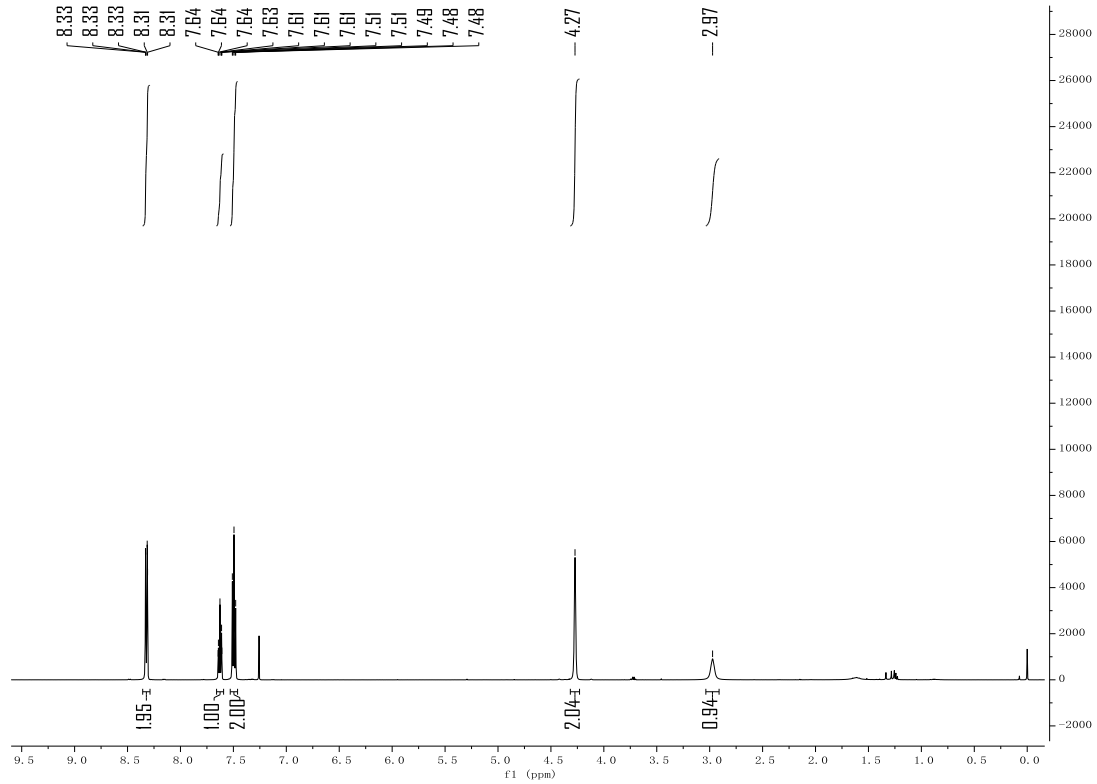

$^1\text{H}$  NMR (500 MHz, Chloroform-*d*)

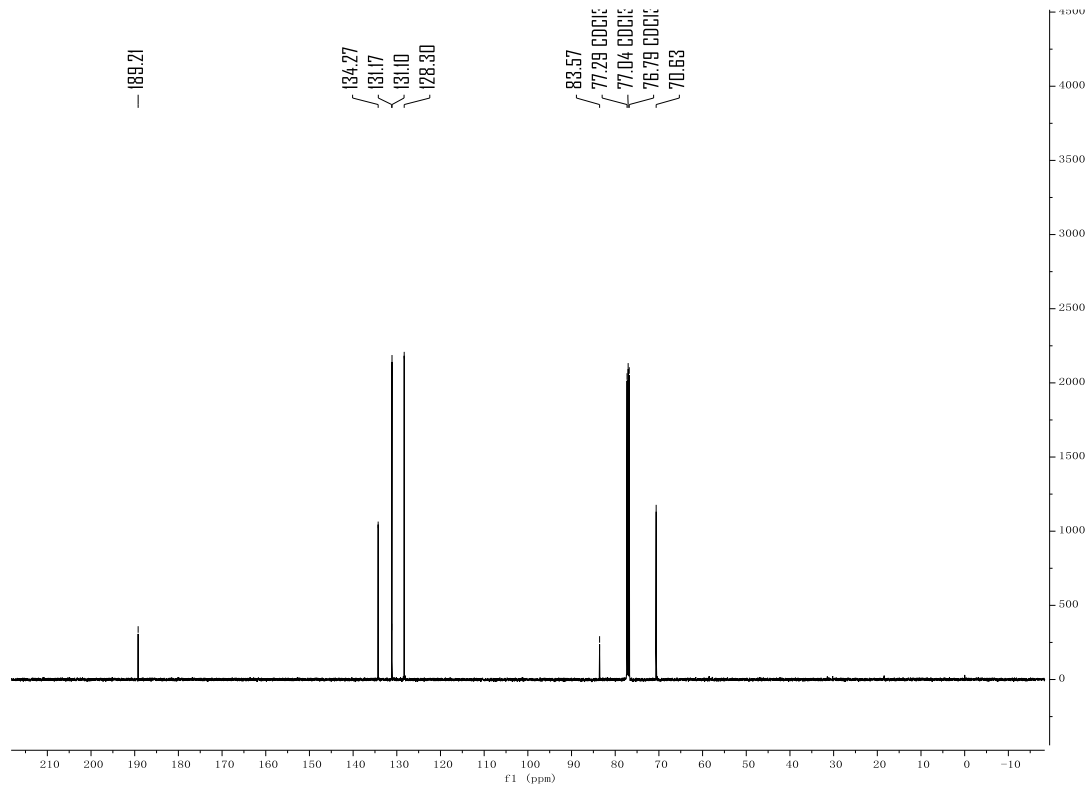

$^{13}\text{C}\{^1\text{H}\}$  NMR (126 MHz, Chloroform-*d*)

2-chloro-1-(p-tolyl)ethan-1-ol (**d1**)

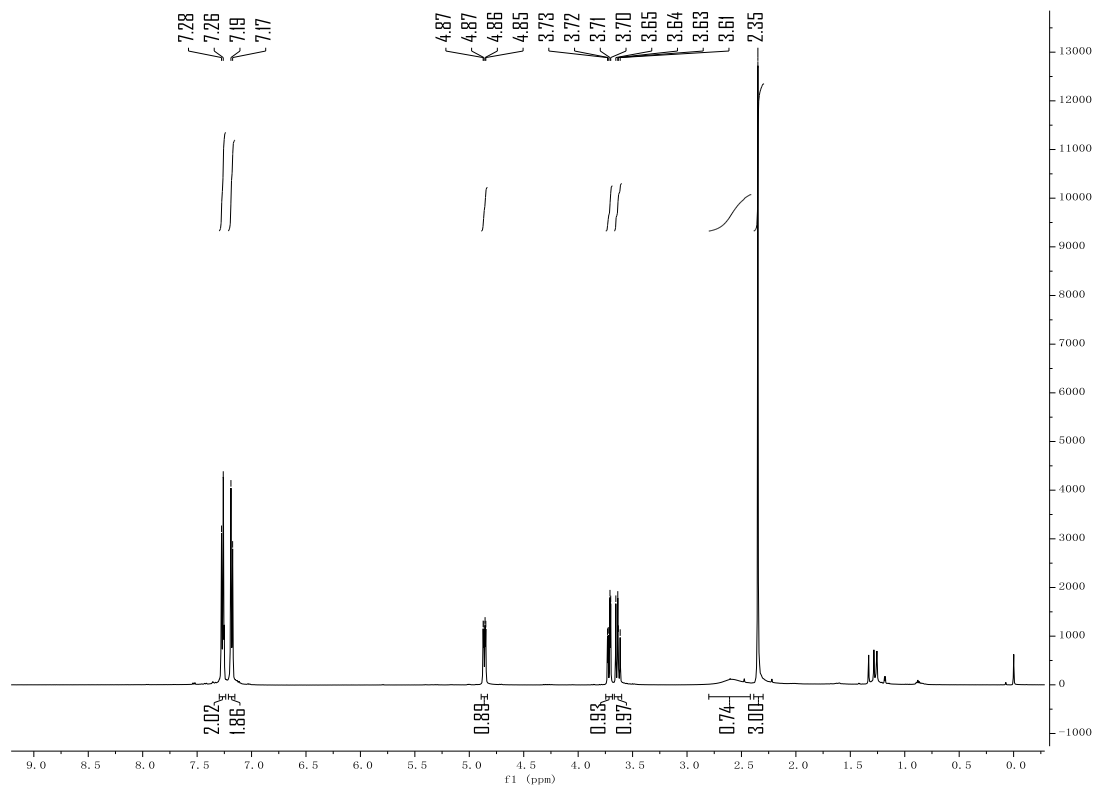

$^1\text{H}$  NMR (500 MHz, Chloroform-*d*)

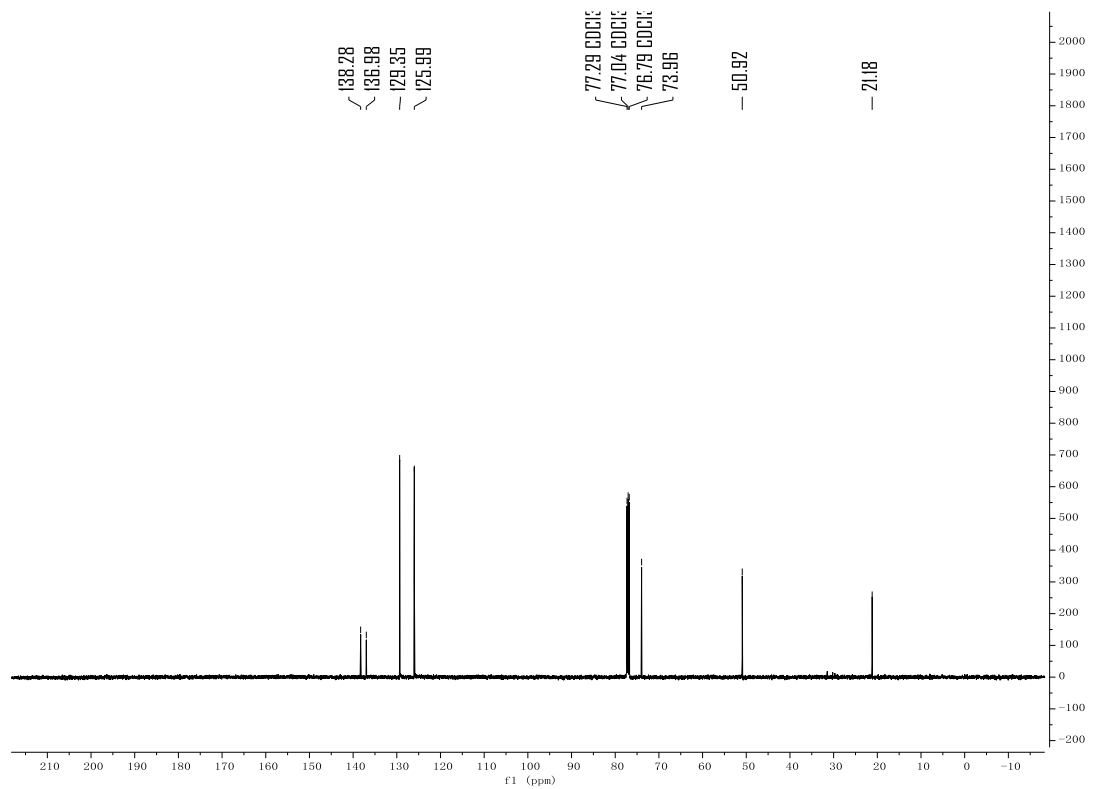

$^{13}\text{C}\{^1\text{H}\}$  NMR (126 MHz, Chloroform-*d*)



2-chloro-1-phenylethan-1-ol (d2)

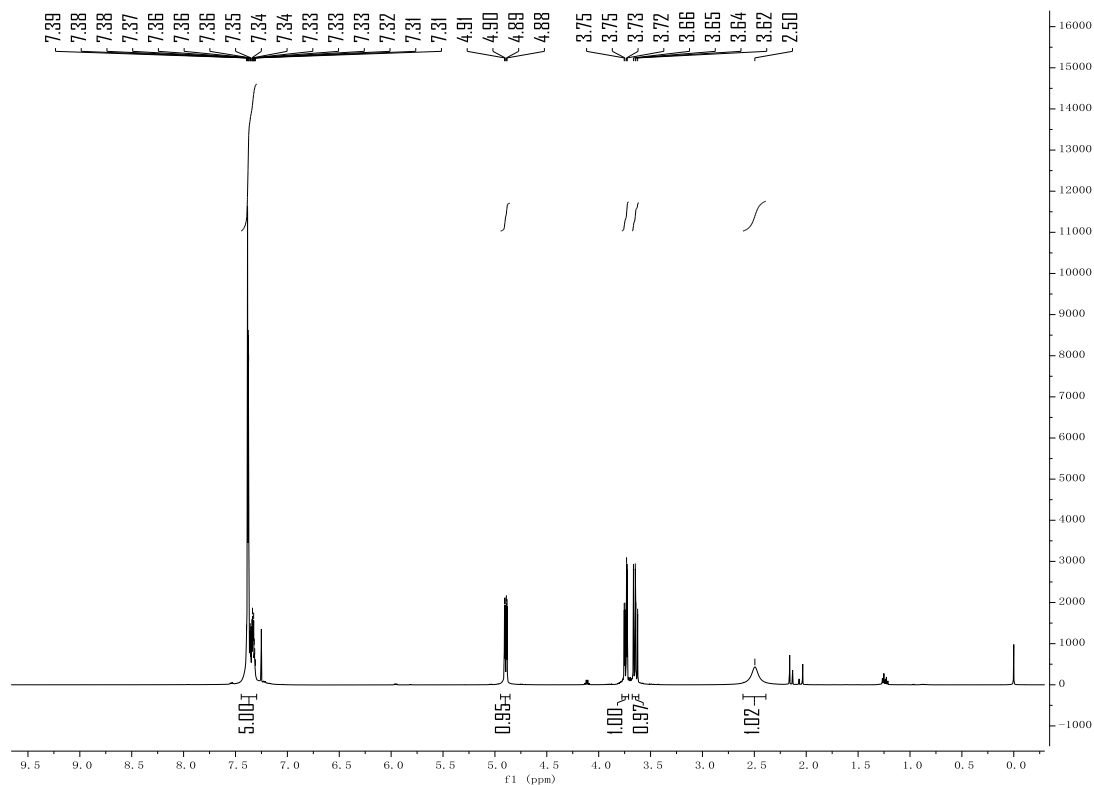

<sup>1</sup>H NMR (500 MHz, Chloroform-*d*)

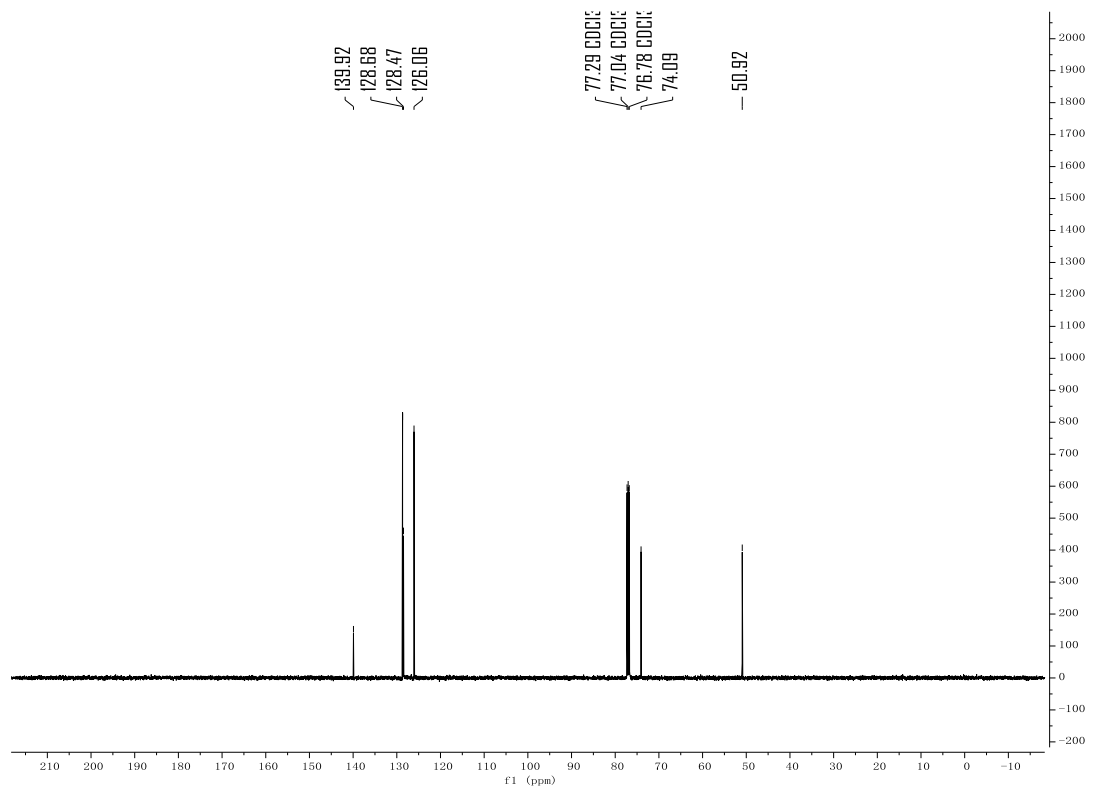

<sup>13</sup>C{<sup>1</sup>H} NMR (126 MHz, Chloroform-*d*)

2-chloro-1-(4-fluorophenyl)ethan-1-ol (**d3**)

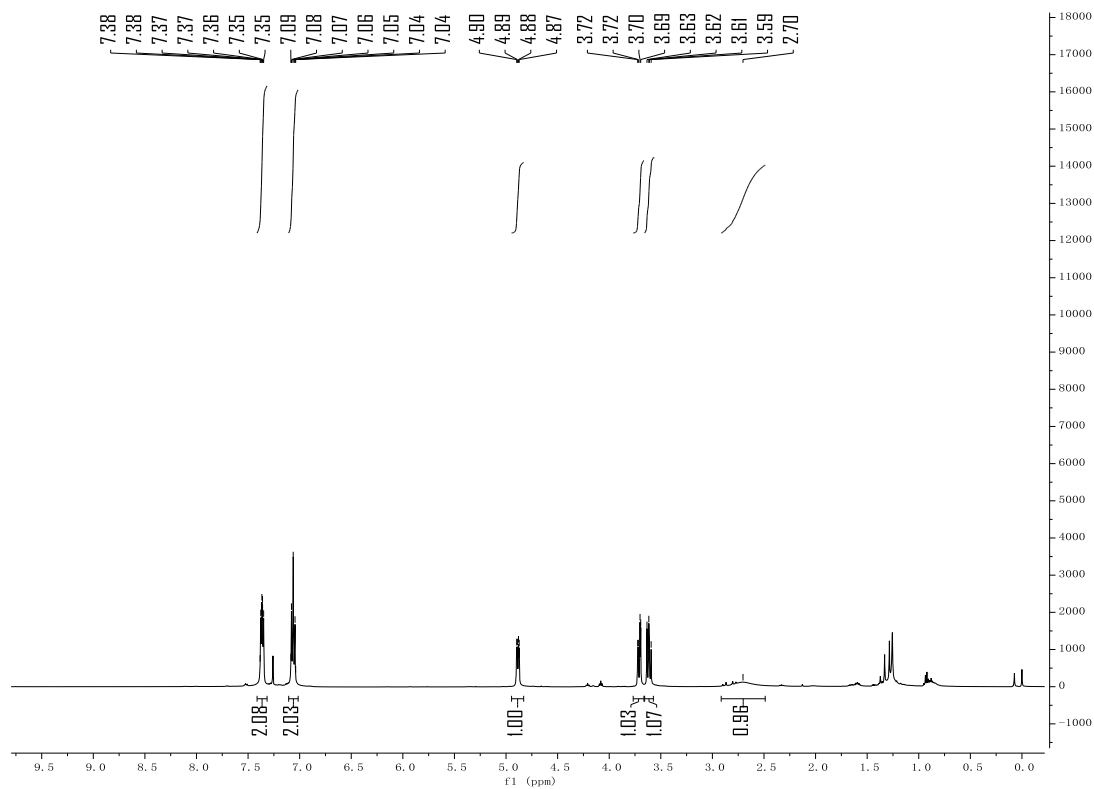

<sup>1</sup>H NMR (500 MHz, Chloroform-*d*)

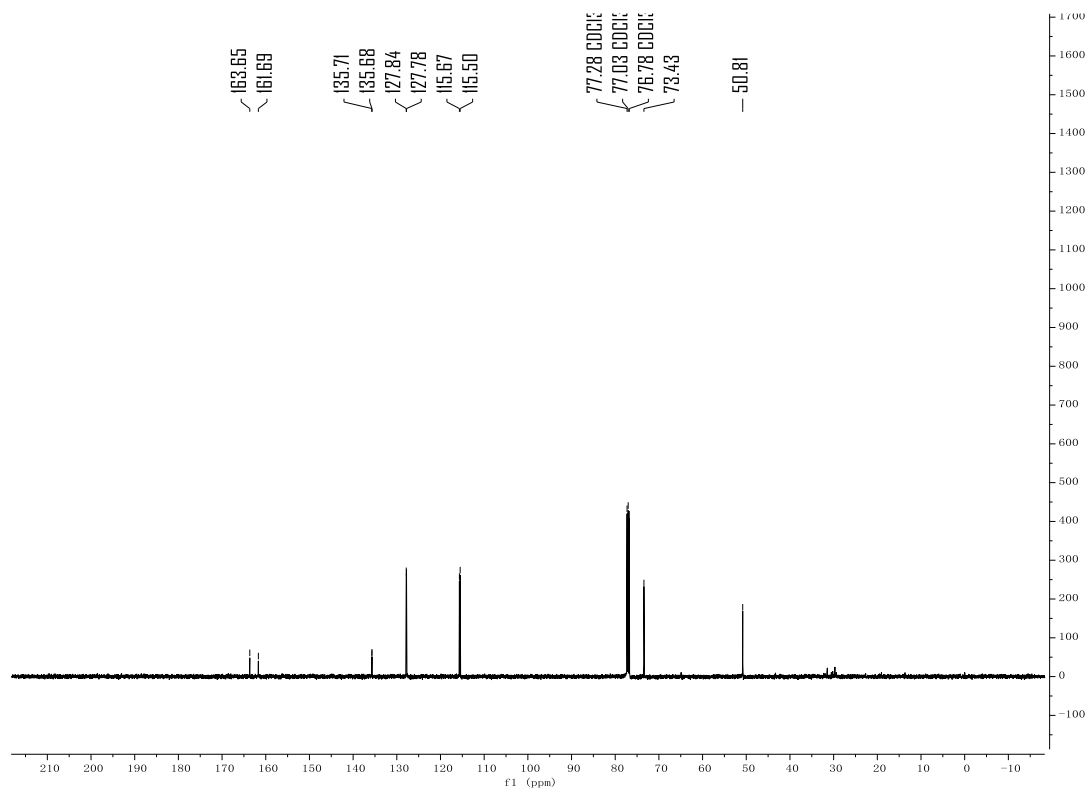

<sup>13</sup>C {<sup>1</sup>H} NMR (126 MHz, Chloroform-*d*)

2-chloro-1-(4-chlorophenyl)ethan-1-ol (**d4**)

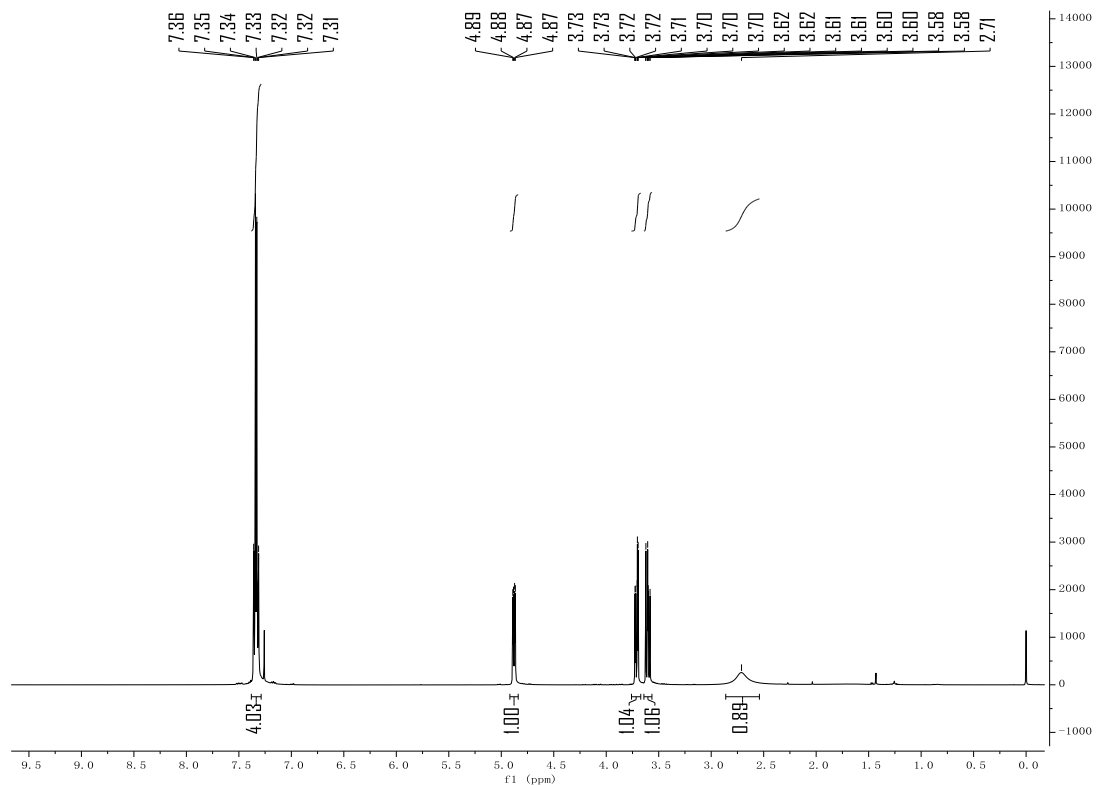

<sup>1</sup>H NMR (500 MHz, Chloroform-*d*)

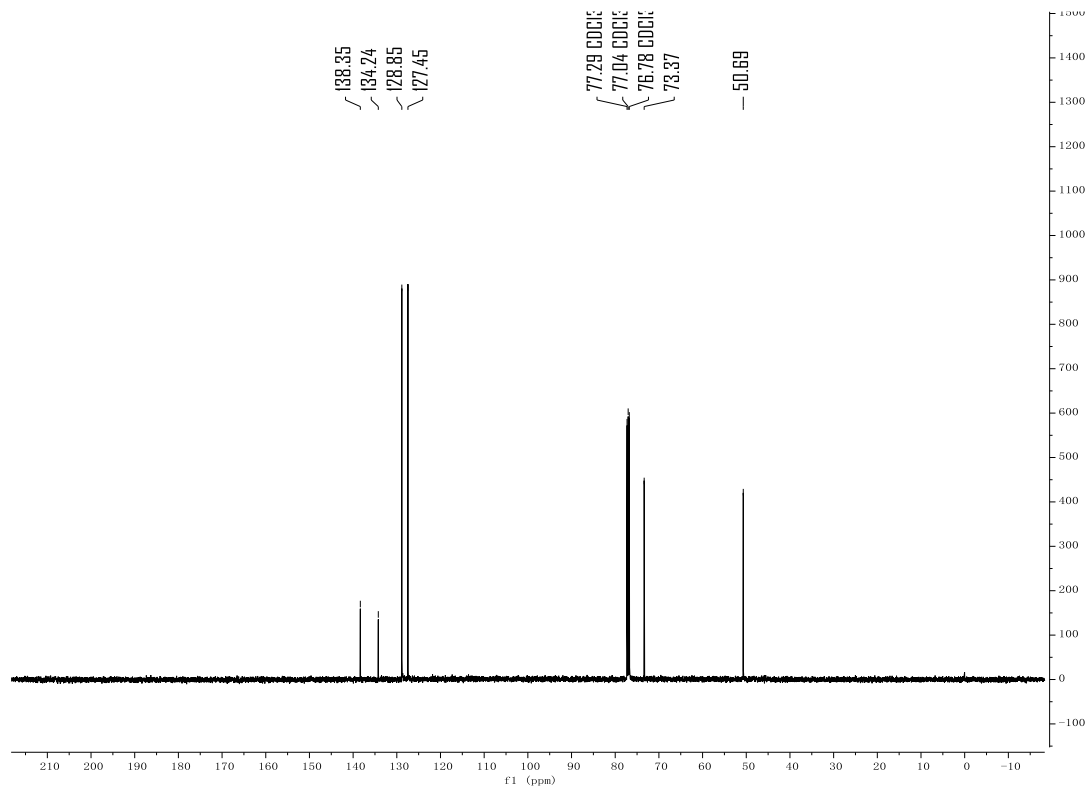

<sup>13</sup>C{<sup>1</sup>H} NMR (126 MHz, Chloroform-*d*)

methyl 4-(2-chloro-1-hydroxyethyl)benzoate (**d5**)

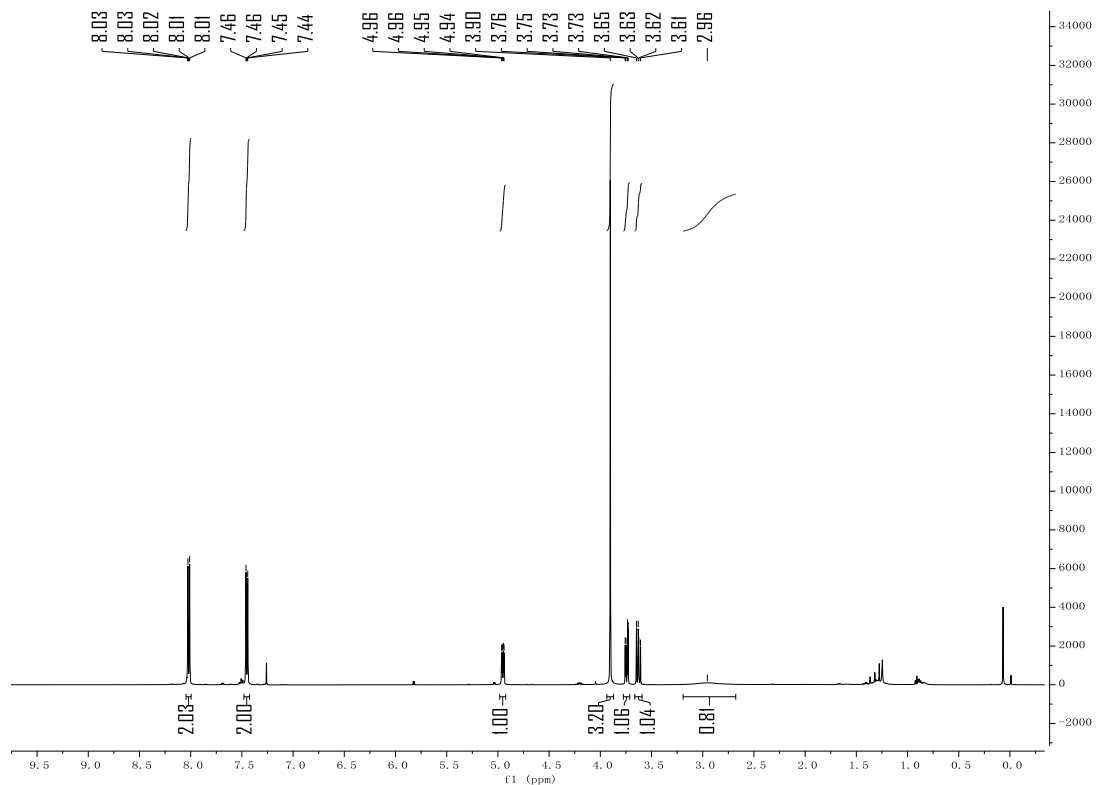

<sup>1</sup>H NMR (500 MHz, Chloroform-*d*)

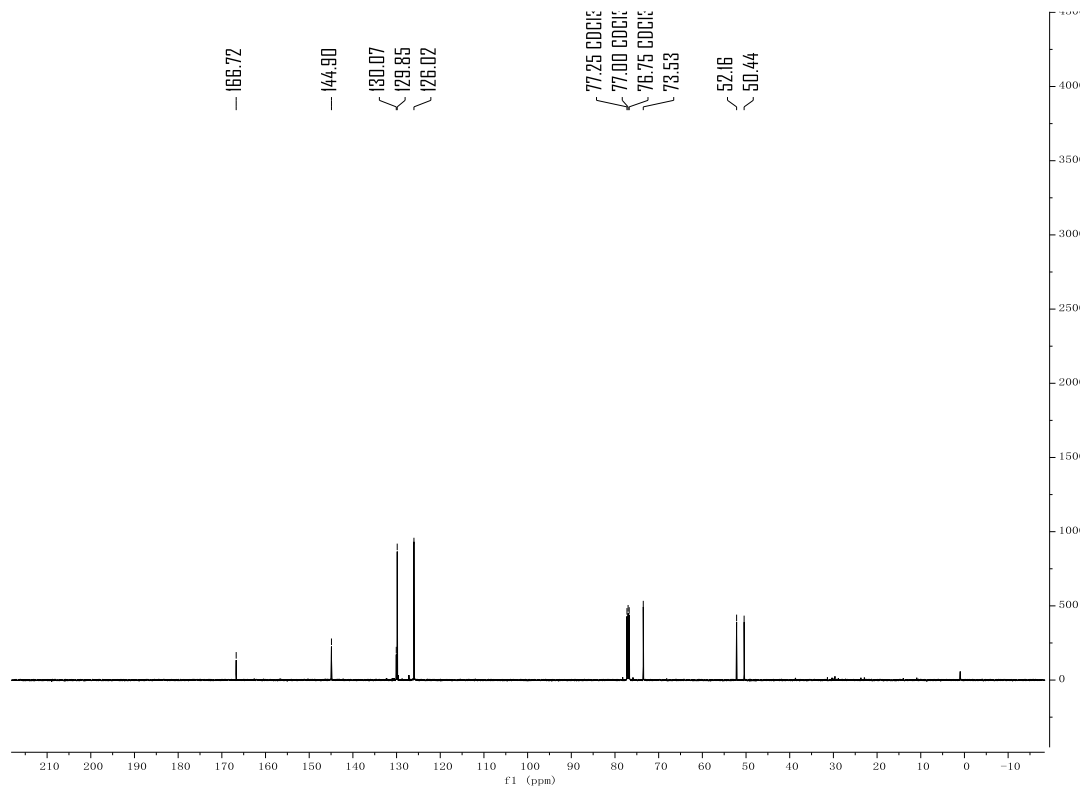

<sup>13</sup>C{<sup>1</sup>H} NMR (126 MHz, Chloroform-*d*)

2-chloro-1-(4-(trifluoromethyl)phenyl)ethan-1-ol (**d6**)

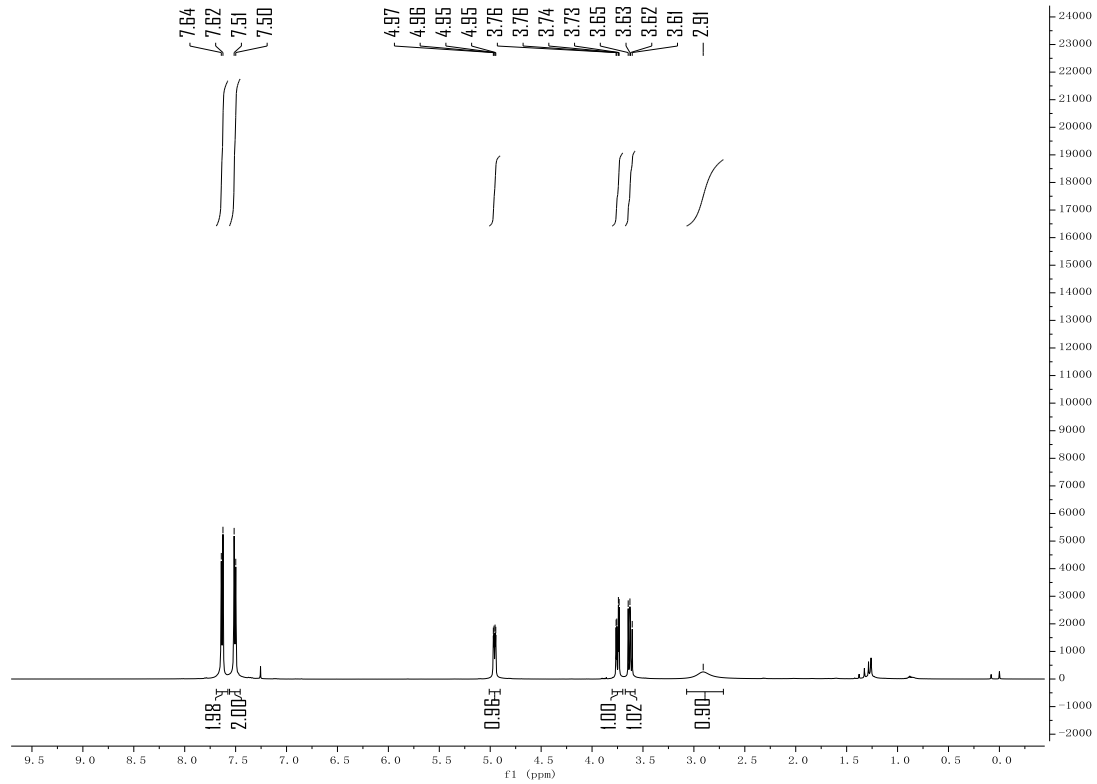

<sup>1</sup>H NMR (500 MHz, Chloroform-*d*)

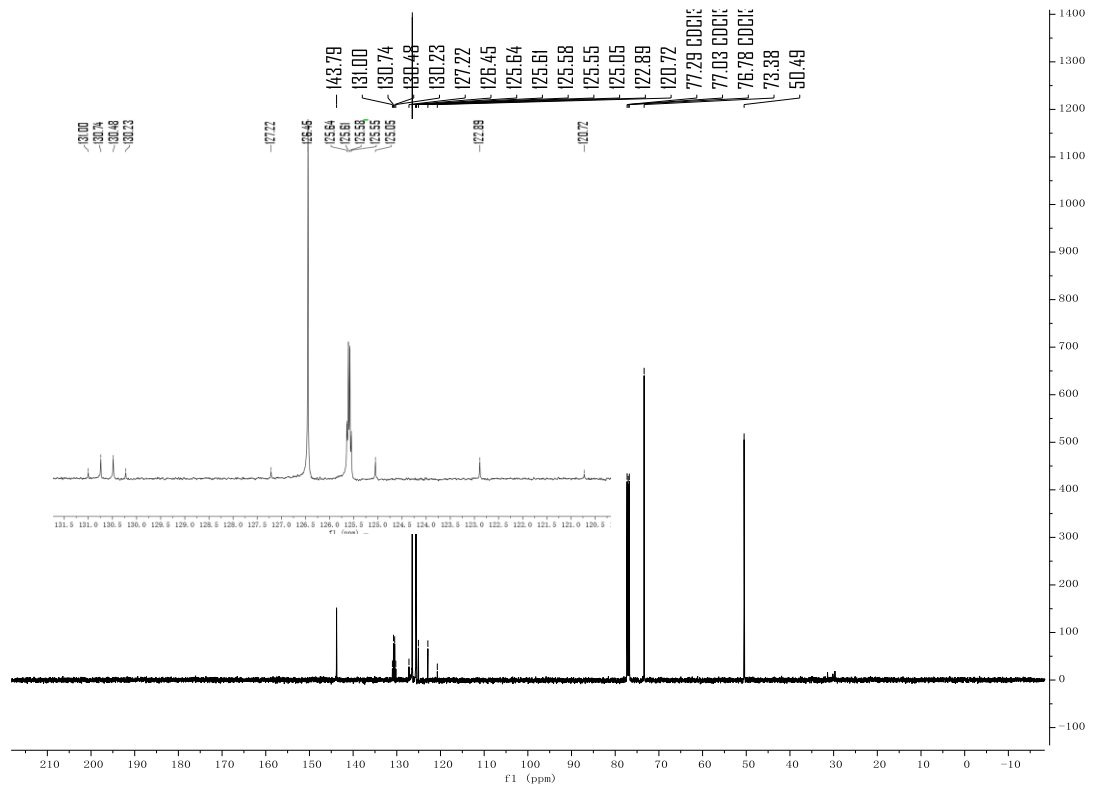

<sup>13</sup>C{<sup>1</sup>H} NMR (126 MHz, Chloroform-*d*)

2-chloro-1-(4-nitrophenyl)ethan-1-ol (**d7**)

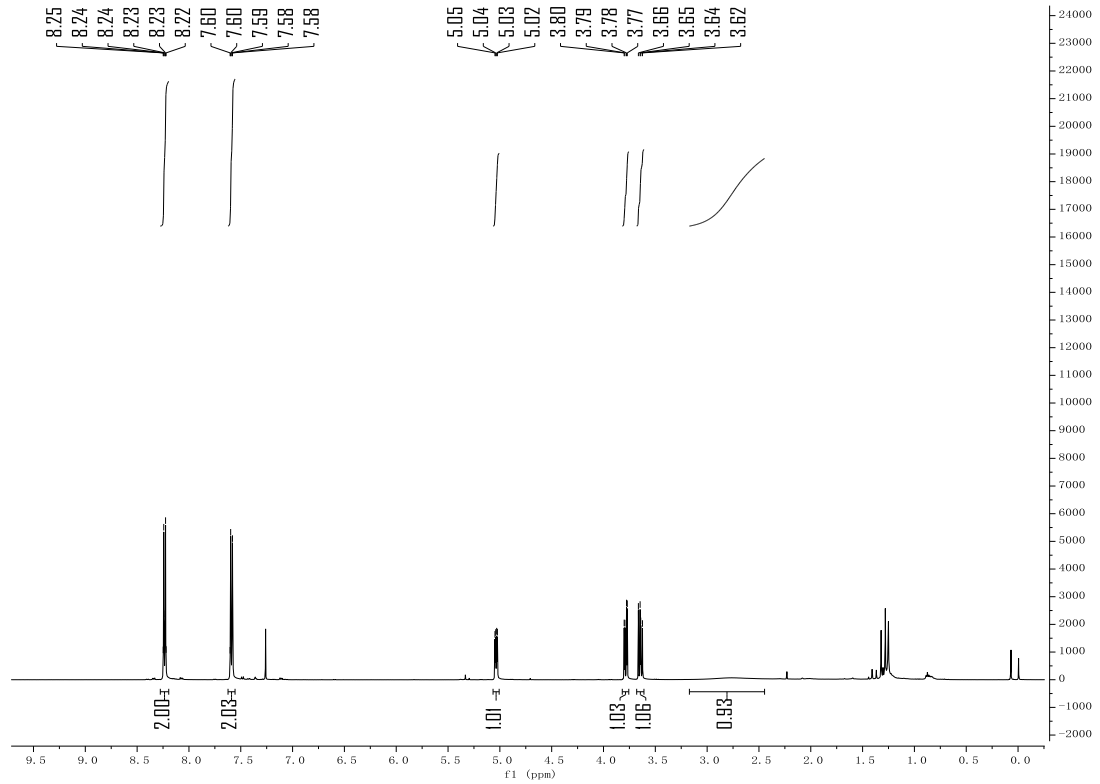

<sup>1</sup>H NMR (500 MHz, Chloroform-*d*)

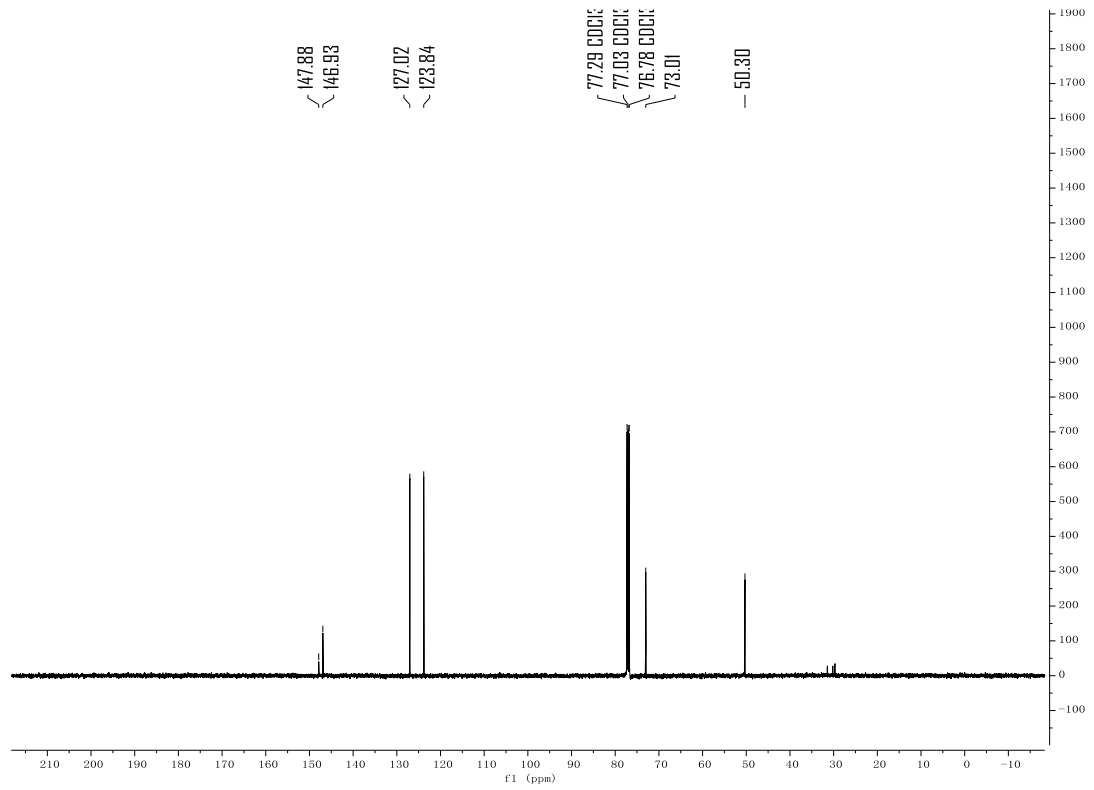

<sup>13</sup>C{<sup>1</sup>H} NMR (126 MHz, Chloroform-*d*)

2-chloro-1-(o-tolyl)ethan-1-ol (**d8**)

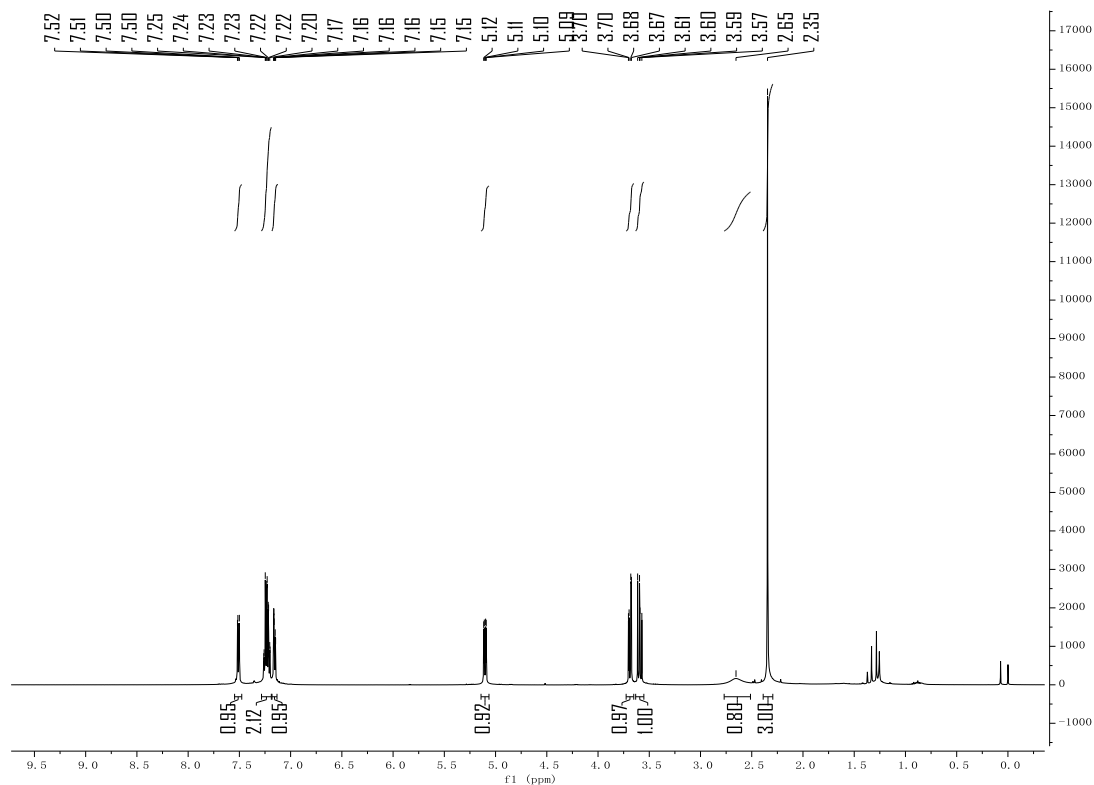

<sup>1</sup>H NMR (500 MHz, Chloroform-*d*)

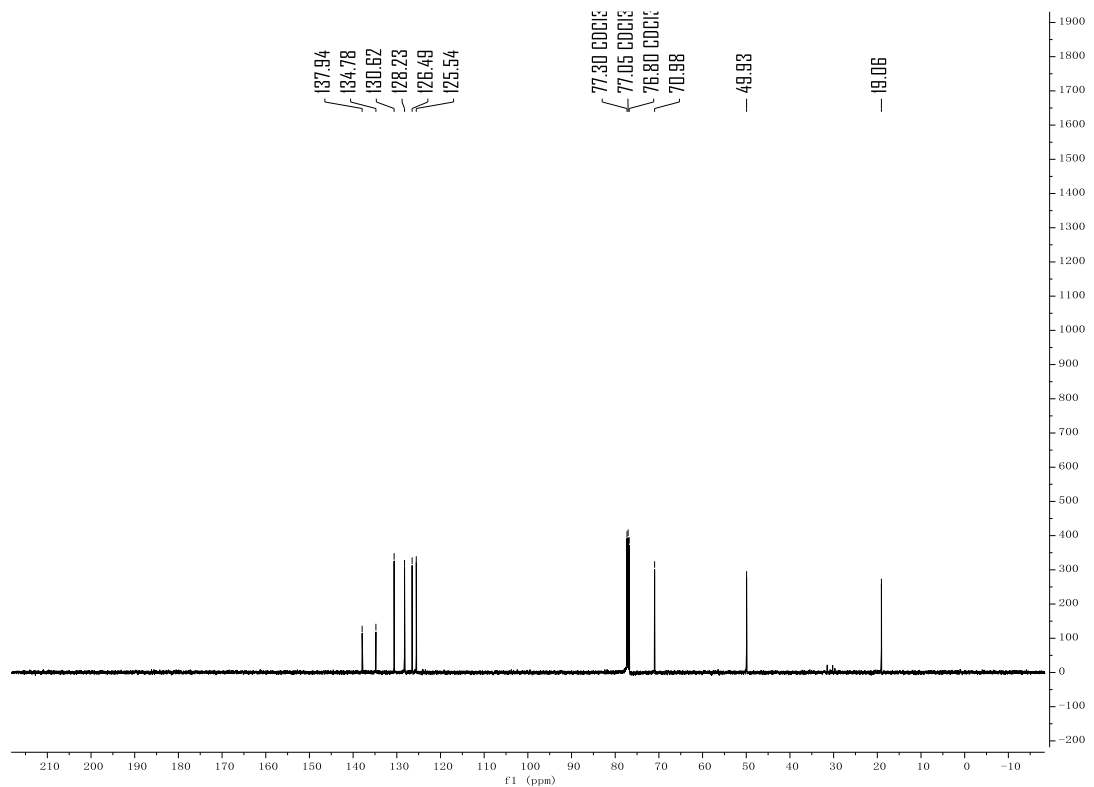

<sup>13</sup>C{<sup>1</sup>H} NMR (126 MHz, Chloroform-*d*)

2-chloro-1-(naphthalen-2-yl)ethan-1-ol (**d9**)

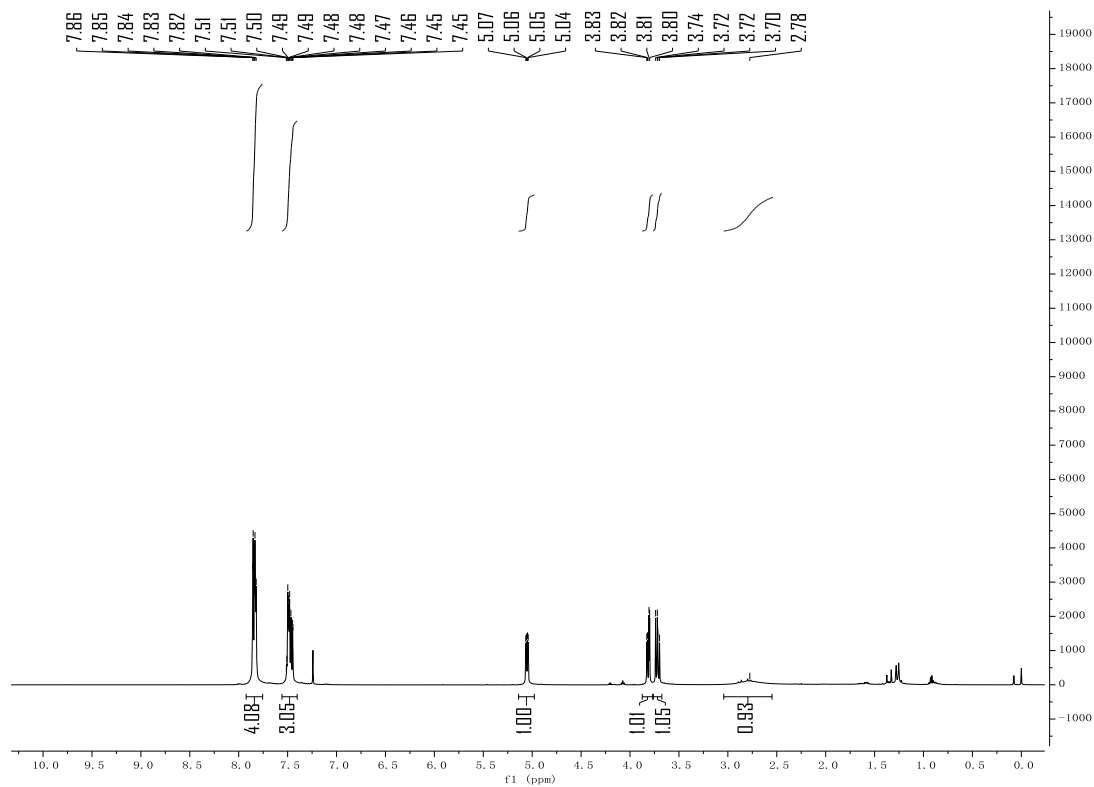

<sup>1</sup>H NMR (500 MHz, Chloroform-*d*)

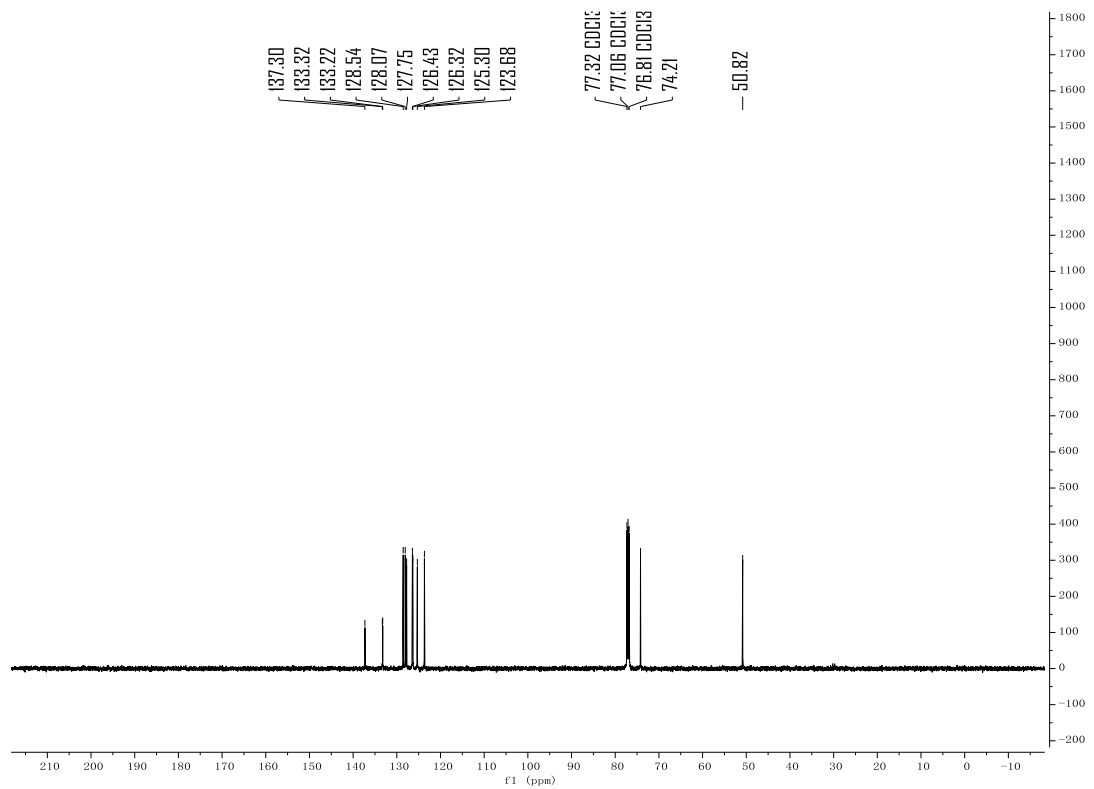

<sup>13</sup>C{<sup>1</sup>H} NMR (126 MHz, Chloroform-*d*)



2-chloro-1-(naphthalen-1-yl)ethan-1-ol (d10)

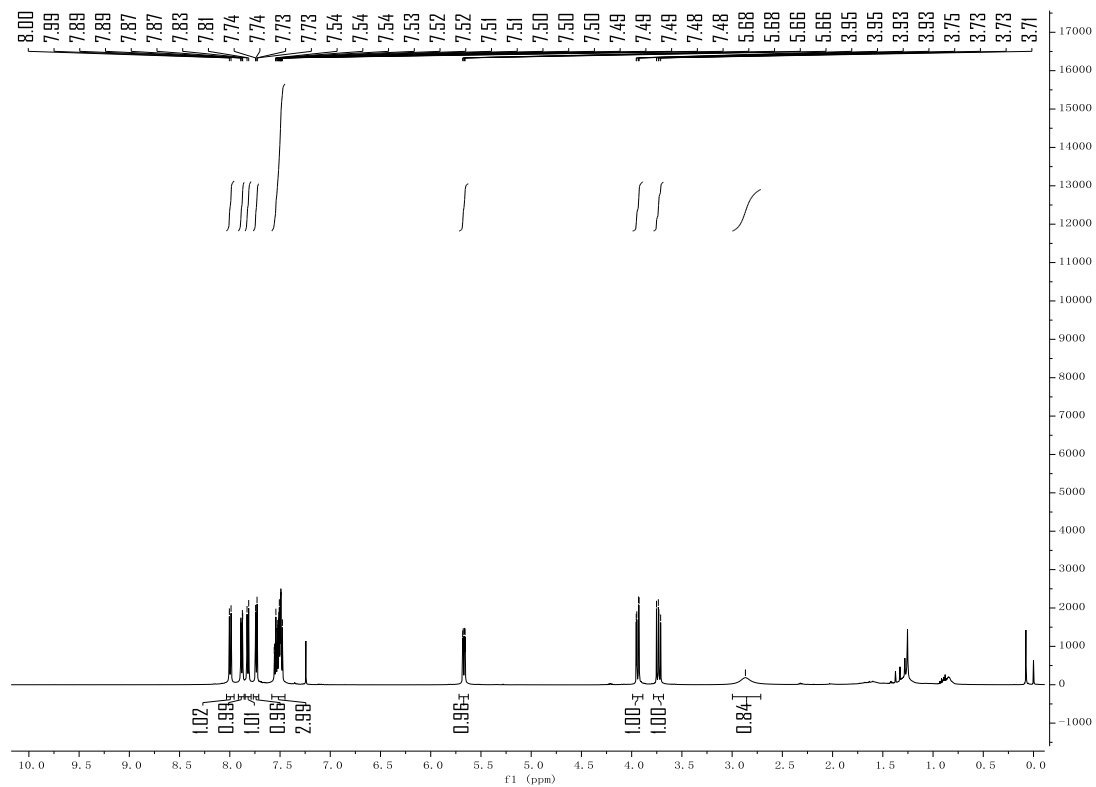

$^1\text{H}$  NMR (500 MHz, Chloroform-*d*)

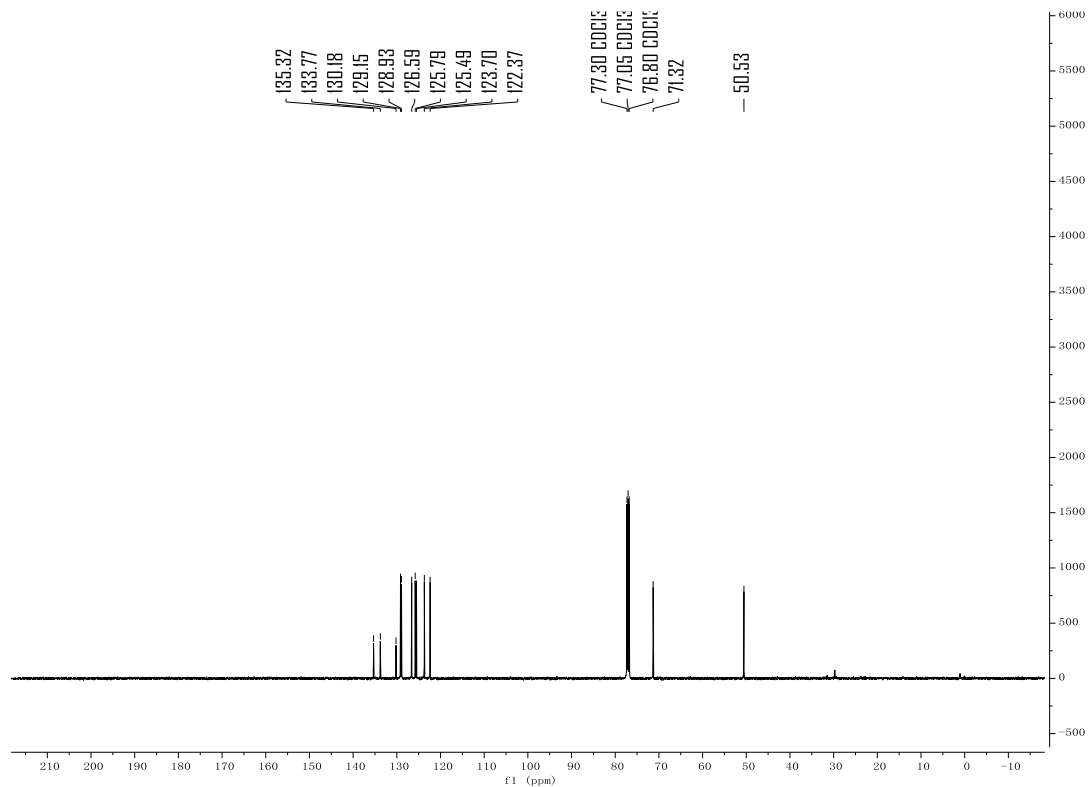

$^{13}\text{C}\{^1\text{H}\}$  NMR (126 MHz, Chloroform-*d*)

(8R,9S,13S,14S)-3-(2-chloro-1-hydroxyethyl)-13-methyl-6,7,8,9,11,12,13,14,15,16-decahydro-17H-cyclopenta[a]phenanthren-17-one (**d11**)

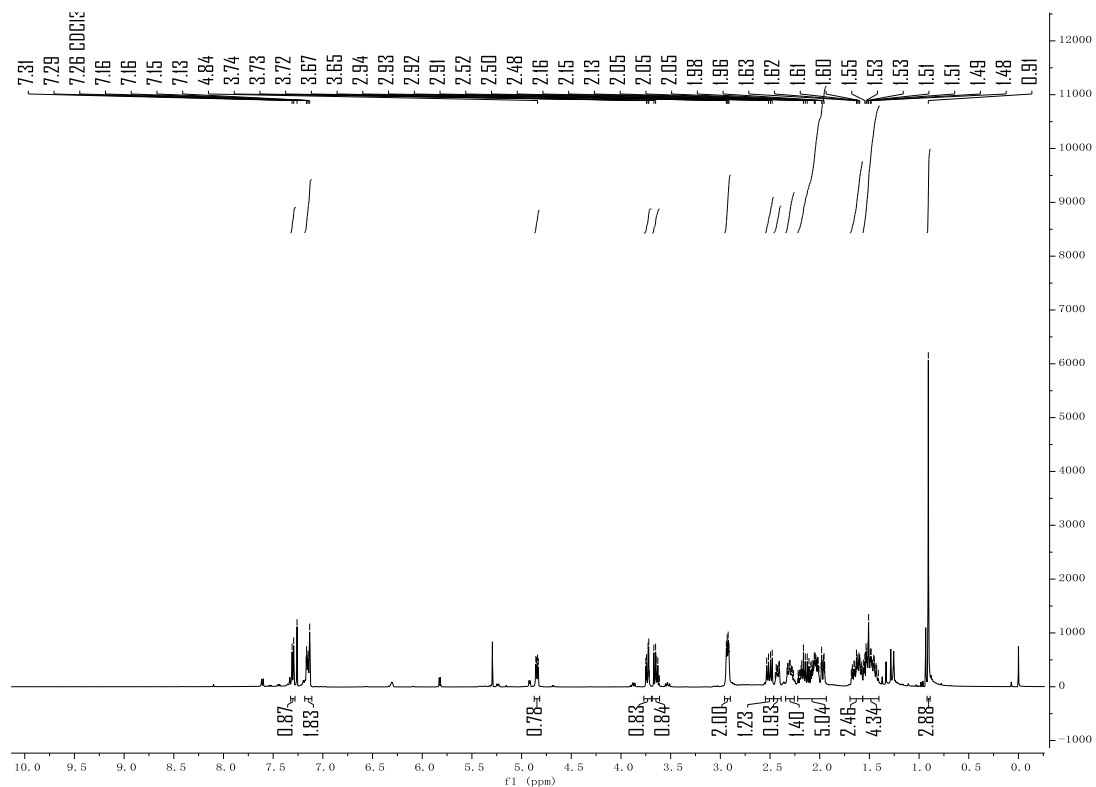

<sup>1</sup>H NMR (500 MHz, Chloroform-*d*)

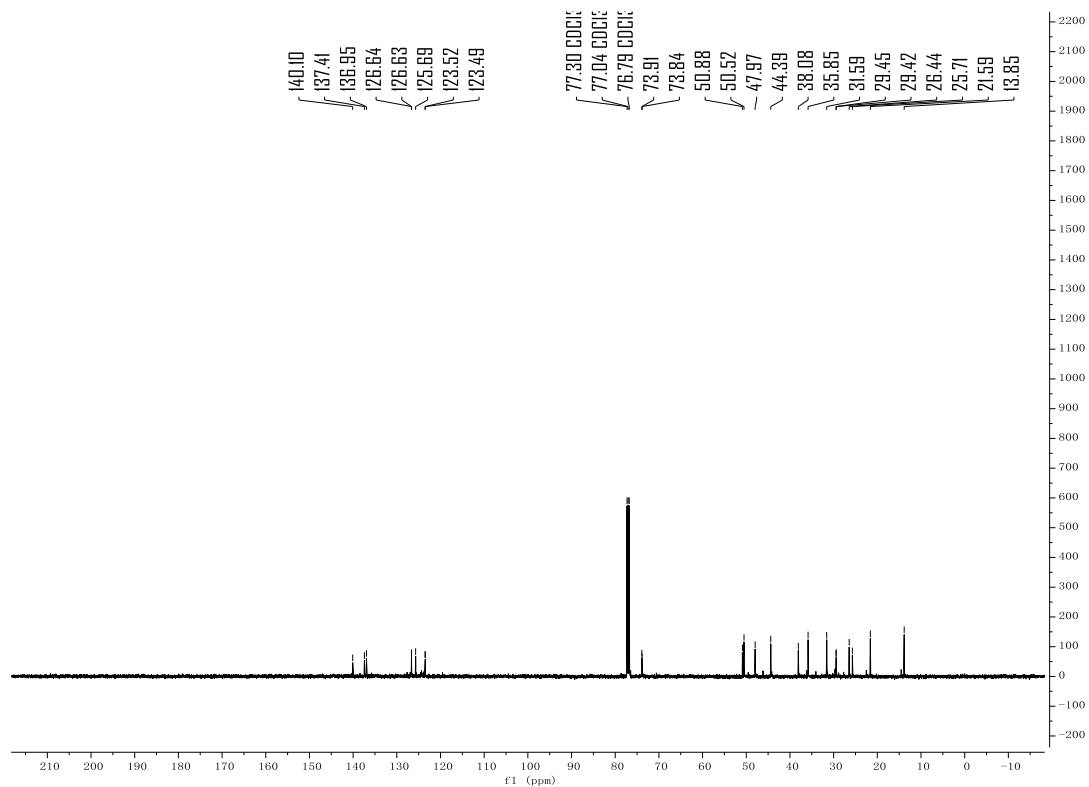

<sup>13</sup>C{<sup>1</sup>H} NMR (126 MHz, Chloroform-*d*)

2-chloro-1-(pyridin-3-yl)ethan-1-ol (d12)

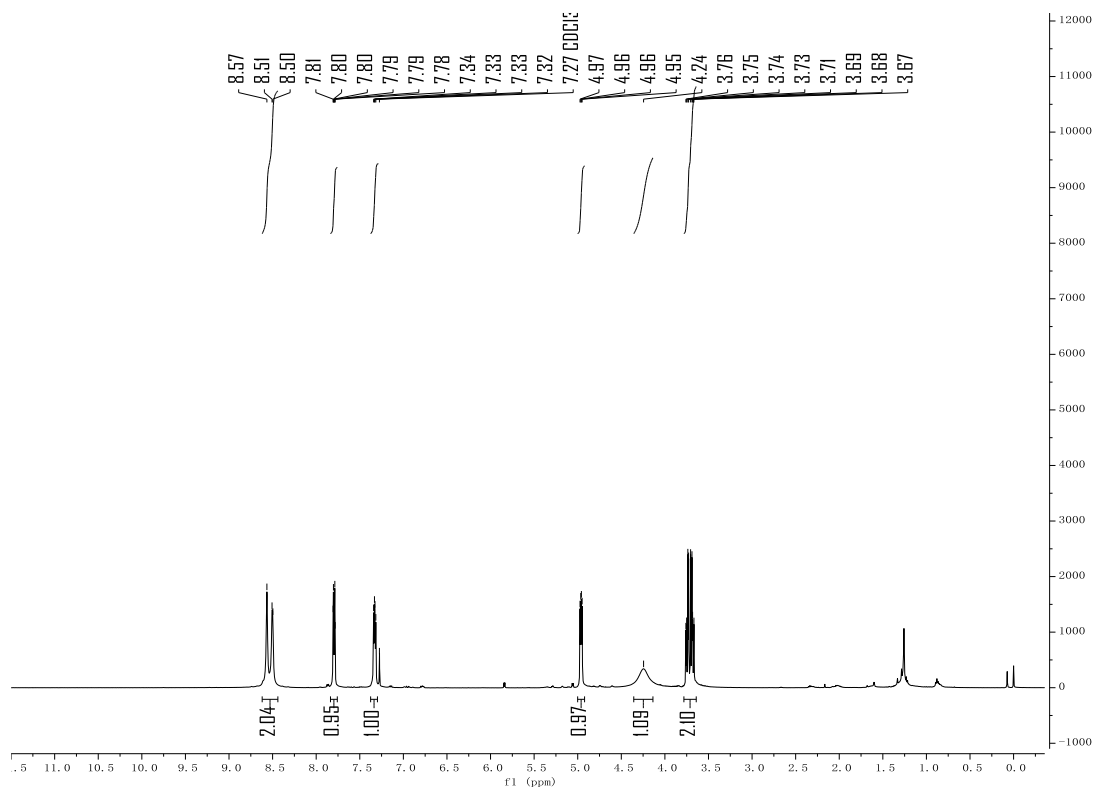

<sup>1</sup>H NMR (500 MHz, Chloroform-*d*)

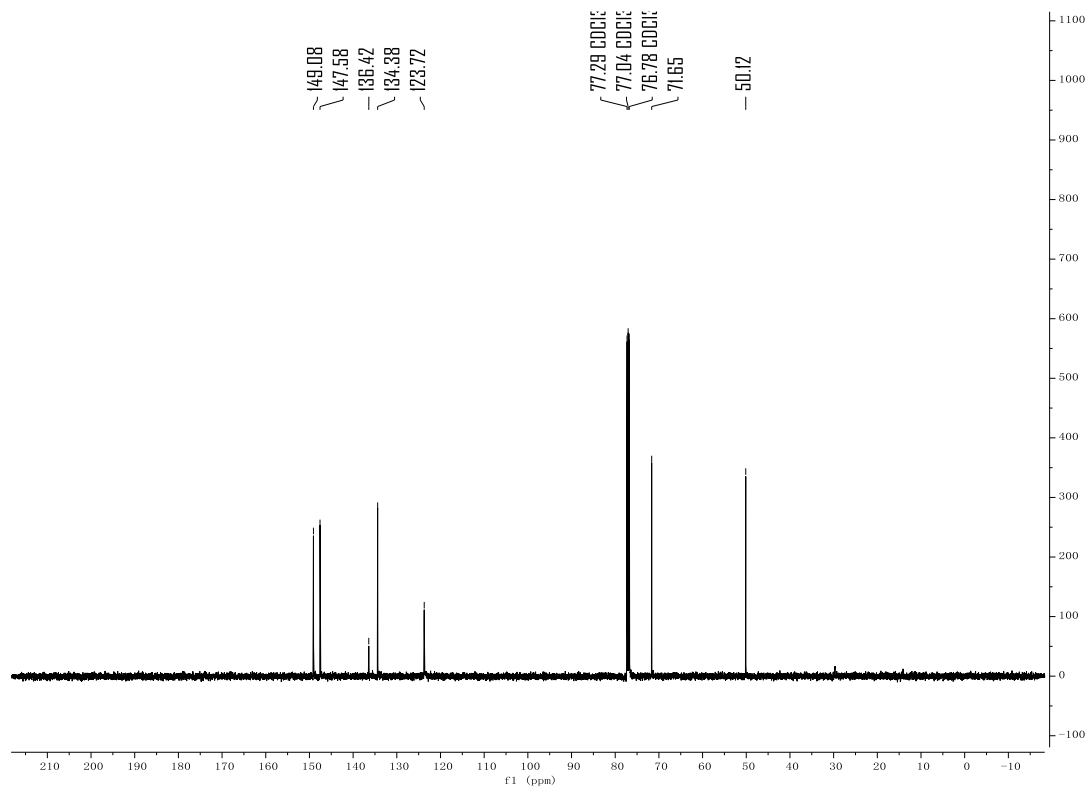

<sup>13</sup>C{<sup>1</sup>H} NMR (126 MHz, Chloroform-*d*)

2-(3-chloro-2-hydroxypropyl)isoindoline-1,3-dione (**d13**)

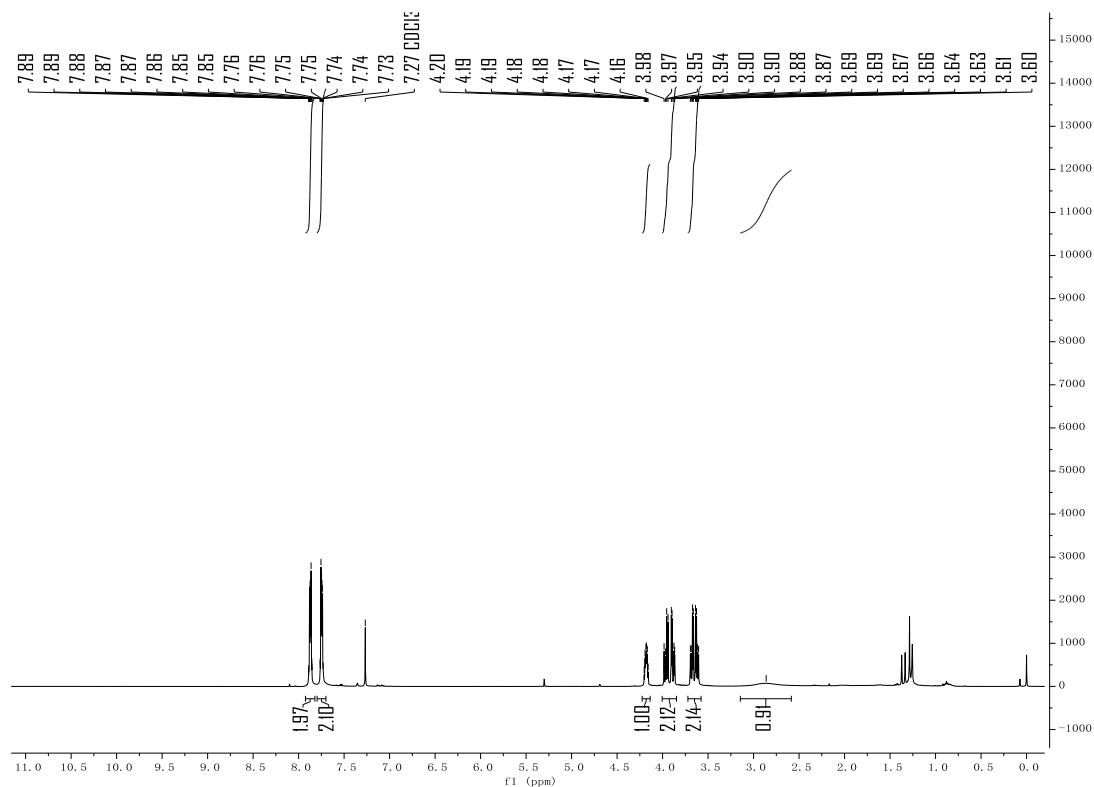

$^1\text{H}$  NMR (500 MHz, Chloroform-*d*)

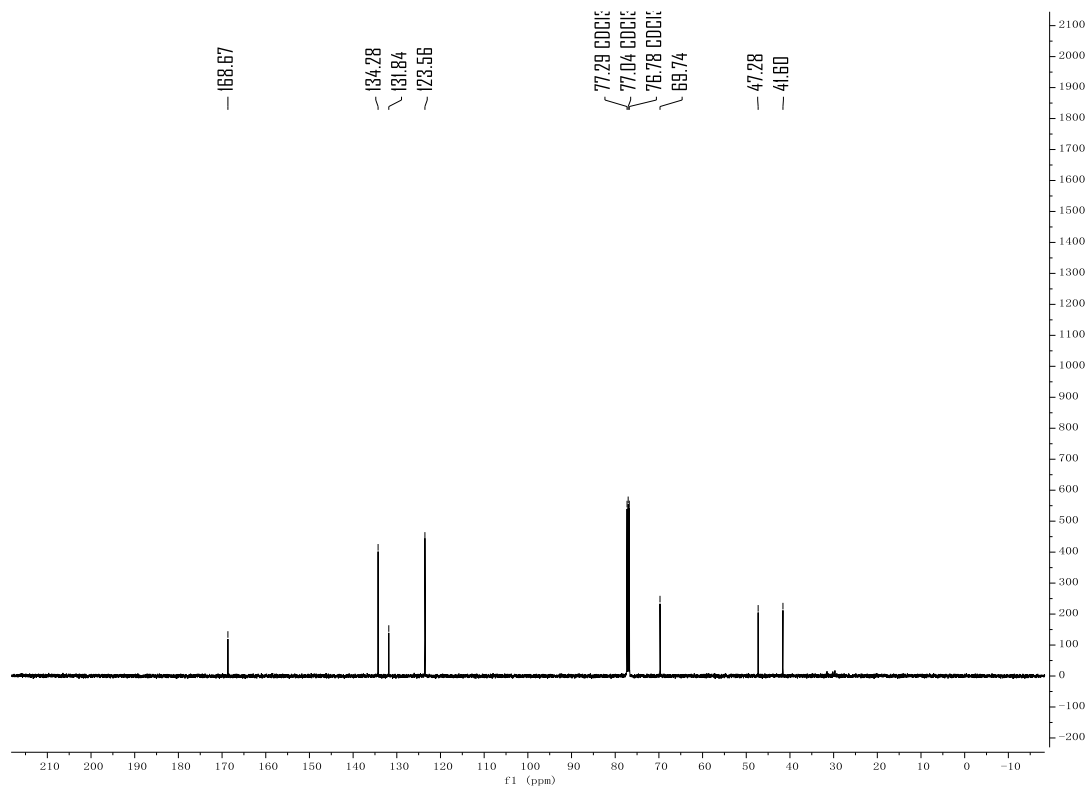

$^{13}\text{C}\{^1\text{H}\}$  NMR (126 MHz, Chloroform-*d*)

2-(2-chloro-3-hydroxypropyl)isoindoline-1,3-dione (**d13'**)

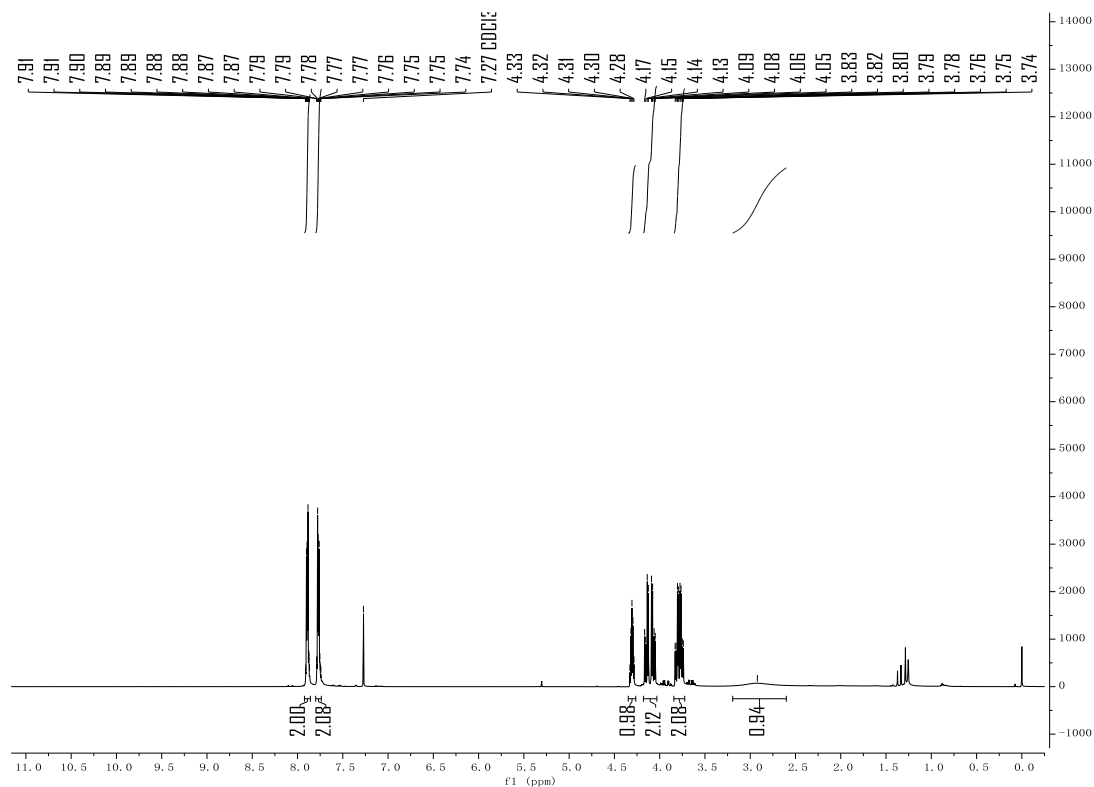

<sup>1</sup>H NMR (500 MHz, Chloroform-*d*)

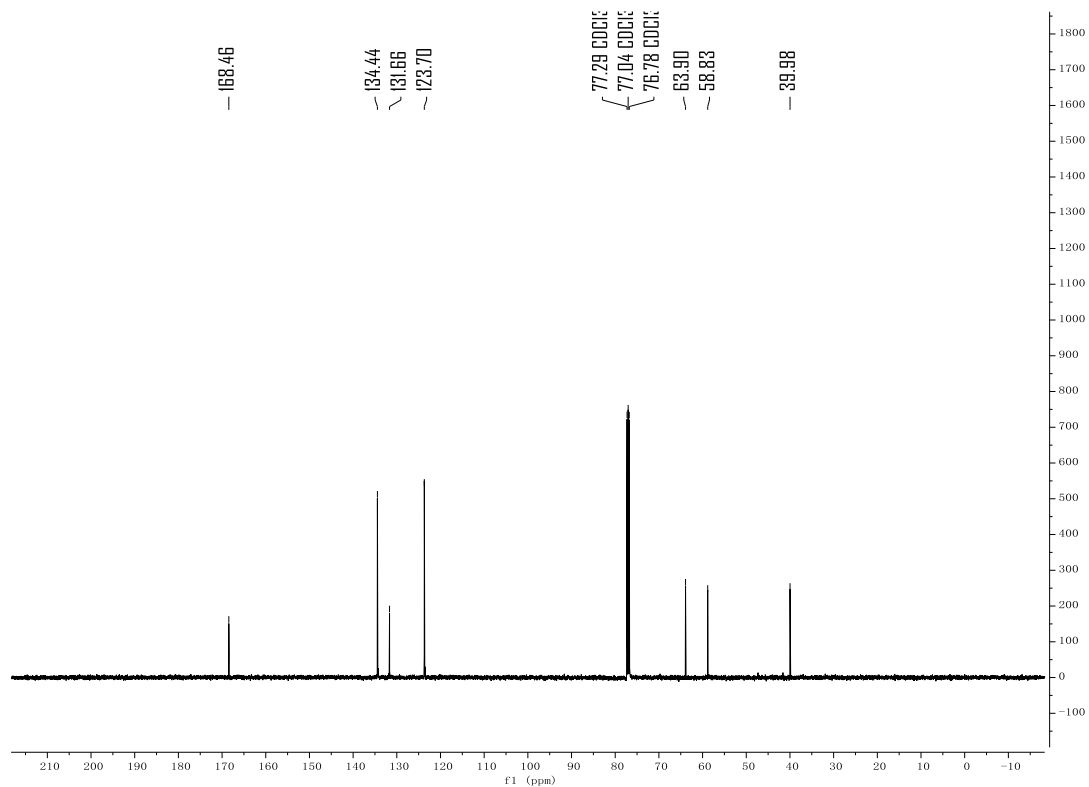

<sup>13</sup>C NMR (126 MHz, Chloroform-*d*)

1-chloro-3-(phenylsulfonyl)propan-2-ol (**d14**)

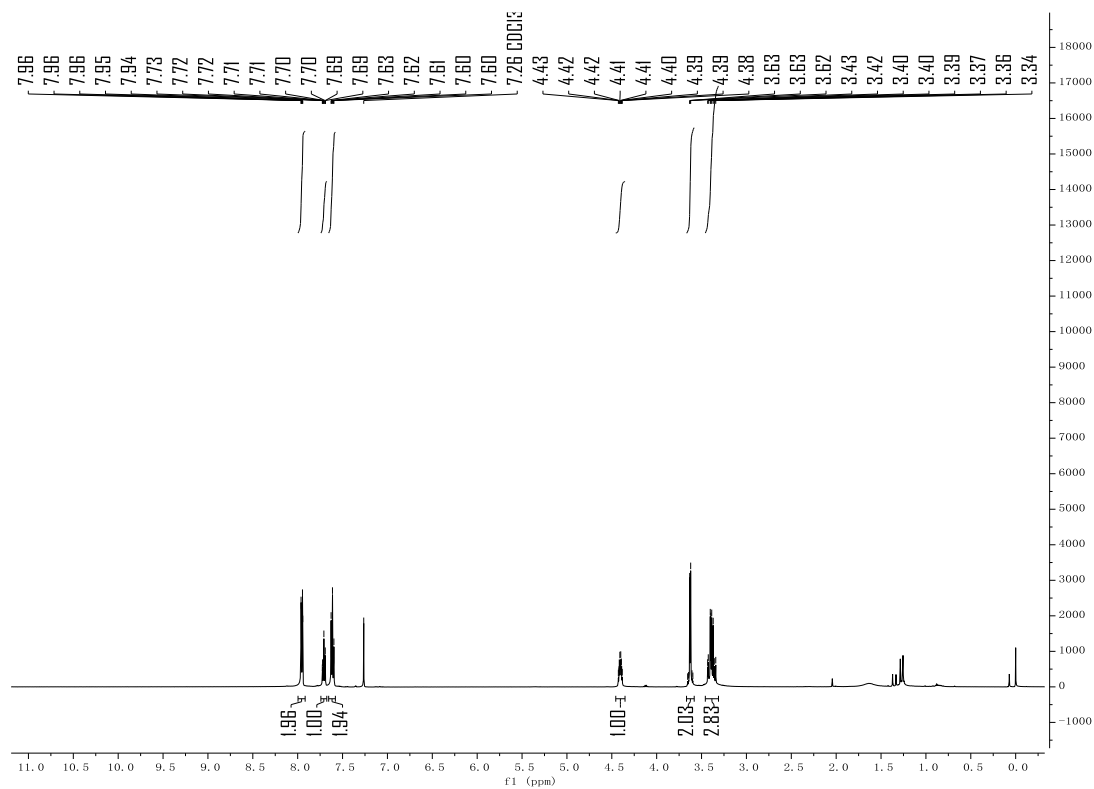

<sup>1</sup>H NMR (500 MHz, Chloroform-*d*)

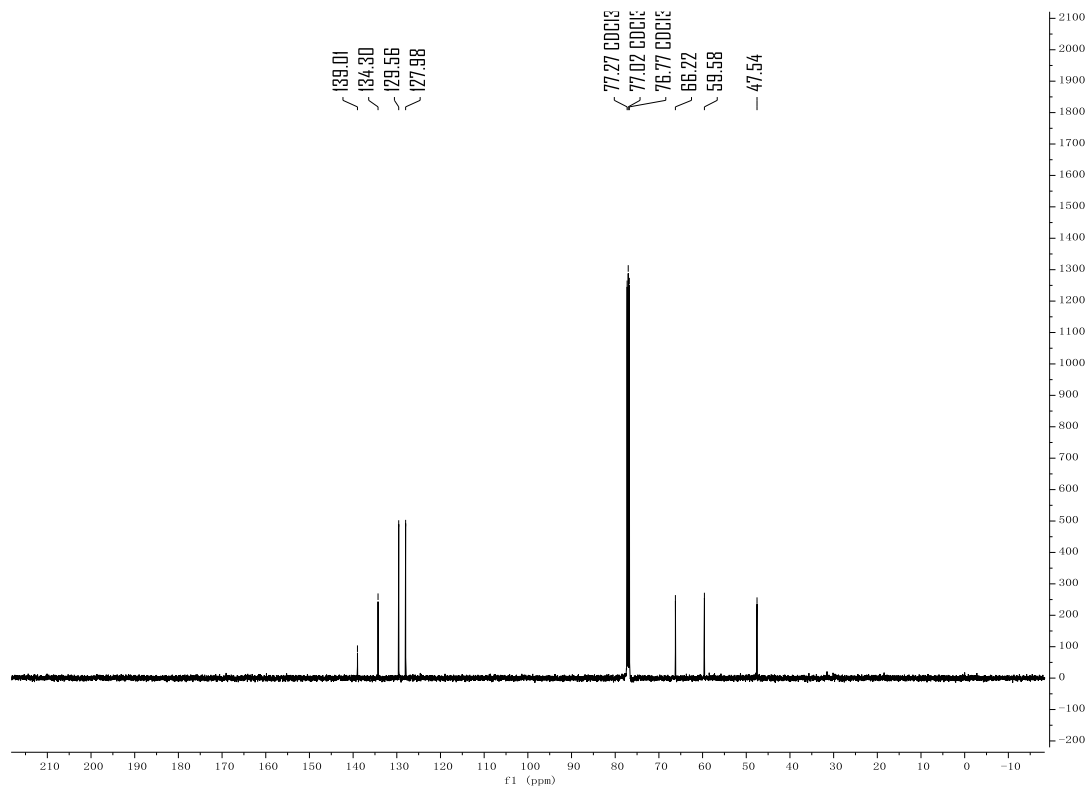

<sup>13</sup>C {<sup>1</sup>H} NMR (126 MHz, Chloroform-*d*)

2-chloro-3-(phenylsulfonyl)propan-1-ol (**d14'**)

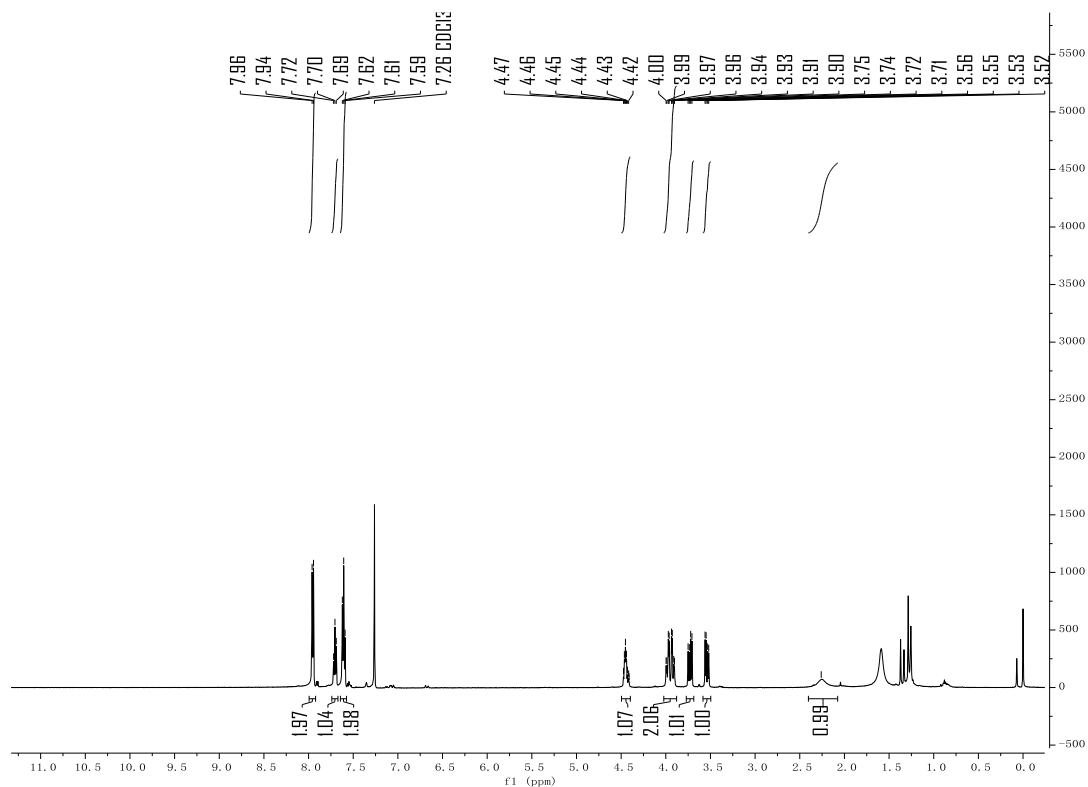

$^1\text{H}$  NMR (500 MHz, Chloroform-*d*)

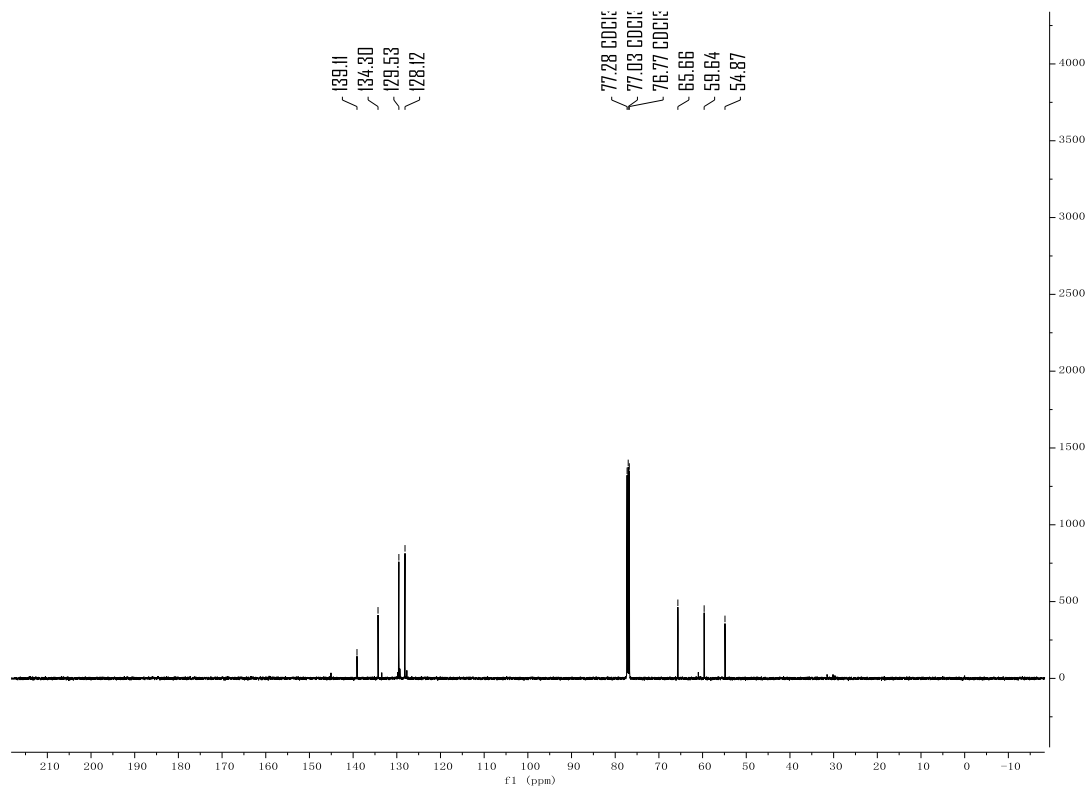

$^{13}\text{C}\{^1\text{H}\}$  NMR (126 MHz, Chloroform-*d*)

*anti*-2-chloro-1-phenylpropan-1-ol (**d15**)

The reaction of *trans*- $\beta$ -methyl styrene (inseparable on silicon chromatography)

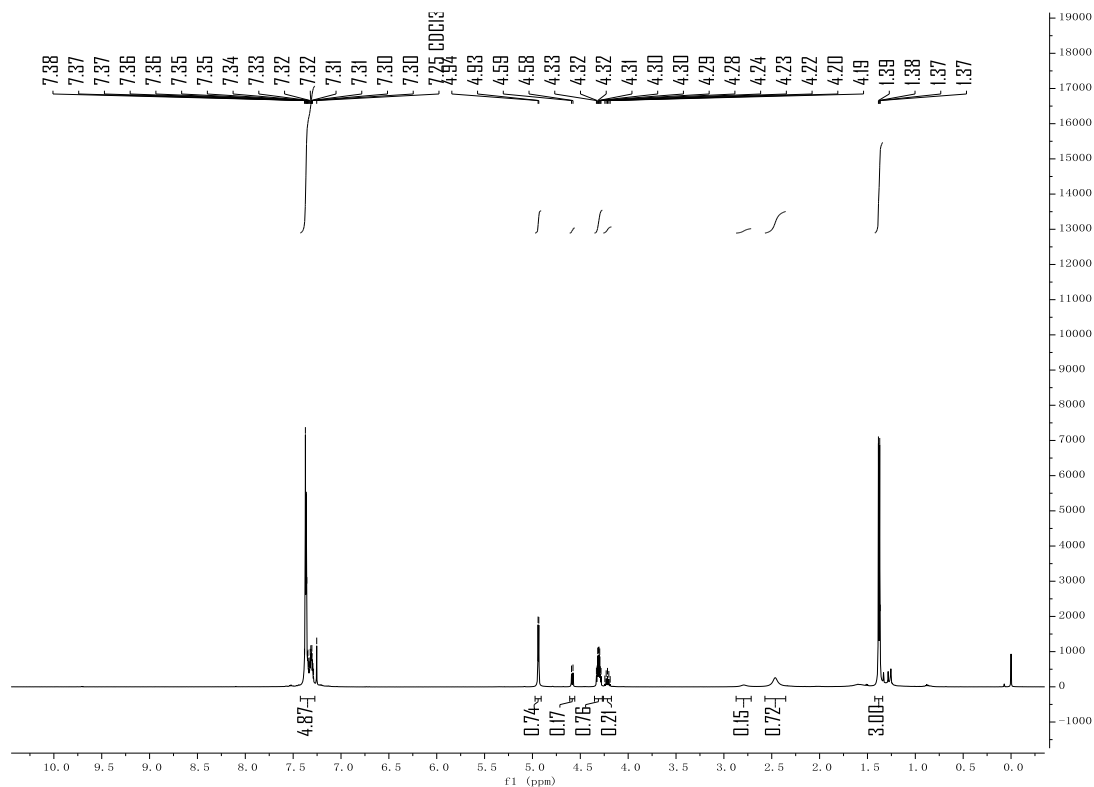

$^1\text{H}$  NMR (500 MHz, Chloroform-*d*)

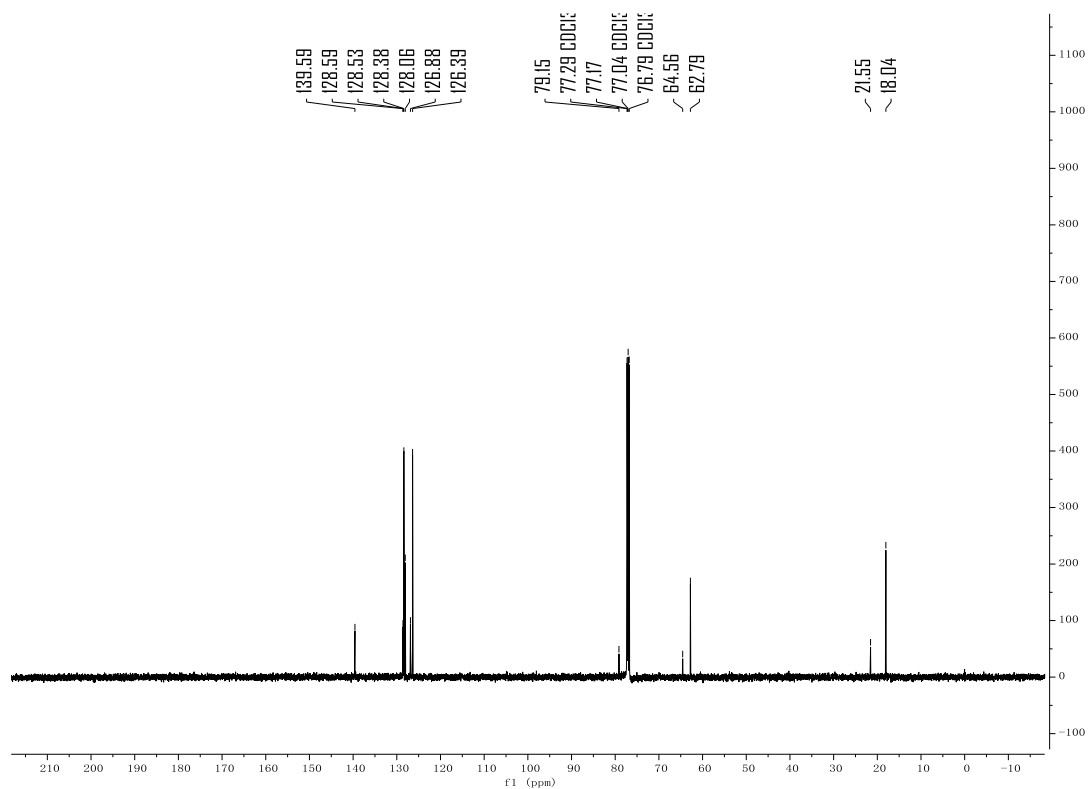

$^{13}\text{C}\{^1\text{H}\}$  NMR (126 MHz, Chloroform-*d*)



*syn*-2-chloro-1-phenylpropan-1-ol (**d15'**)

The reaction of *cis*- $\beta$ -methyl styrene (inseparable on silicon chromatography)

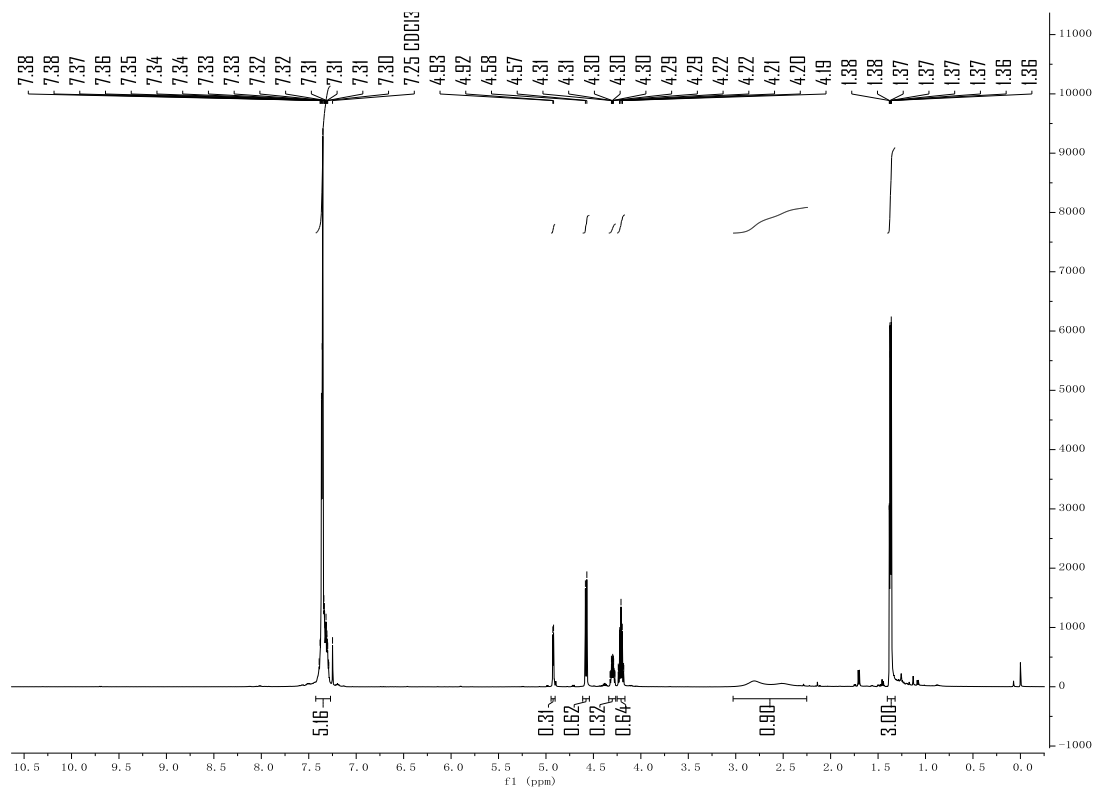

$^1\text{H}$  NMR (500 MHz, Chloroform-*d*)

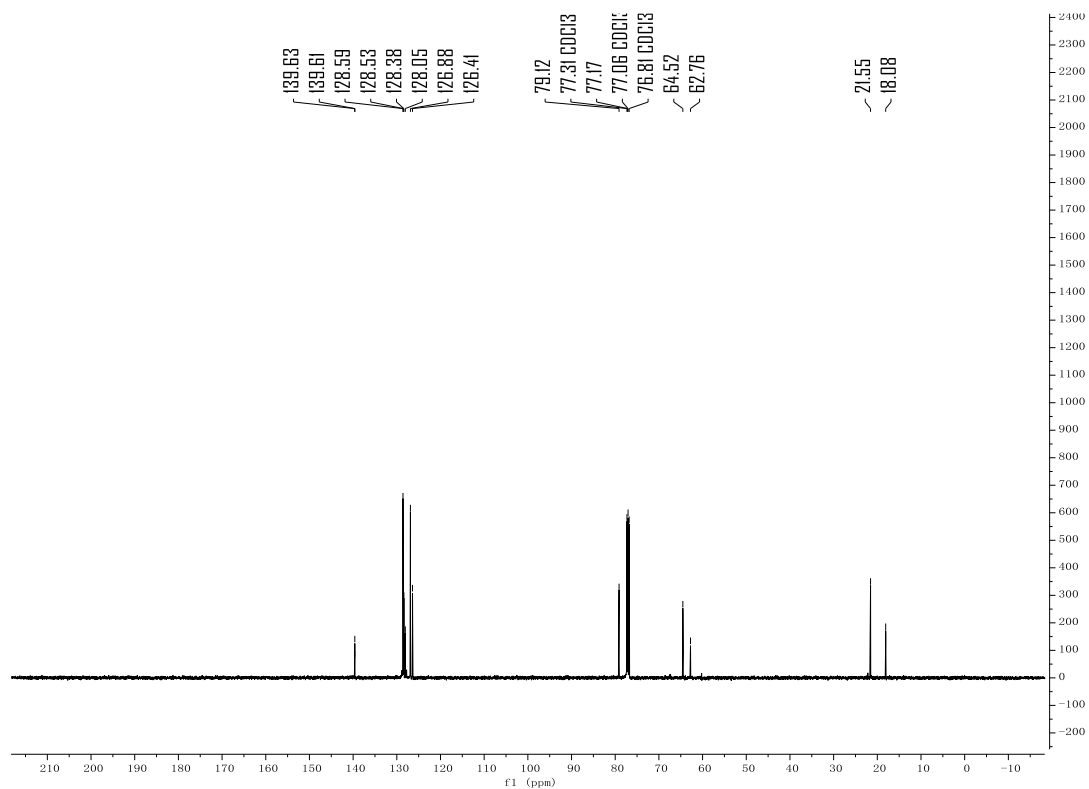

$^{13}\text{C}\{^1\text{H}\}$  NMR (126 MHz, Chloroform-*d*)

*anti*-2-chloro-1,2-diphenylethan-1-ol (**d16**)

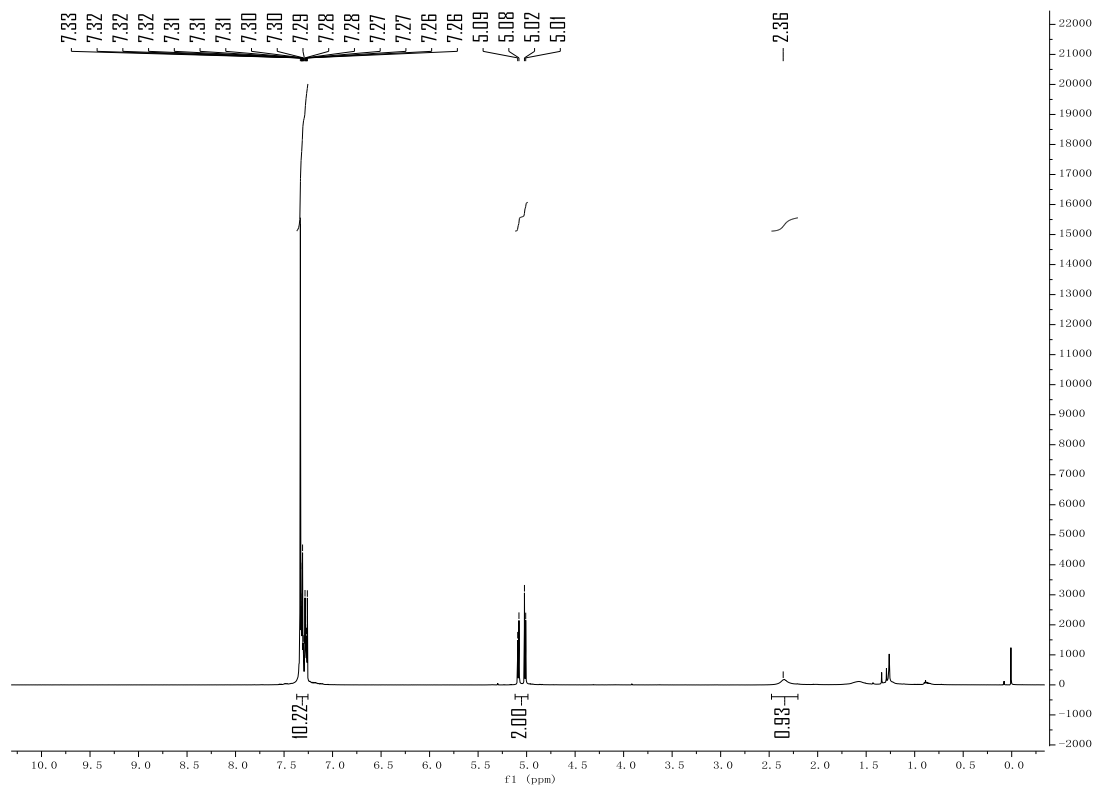

$^1\text{H}$  NMR (500 MHz, Chloroform-*d*)

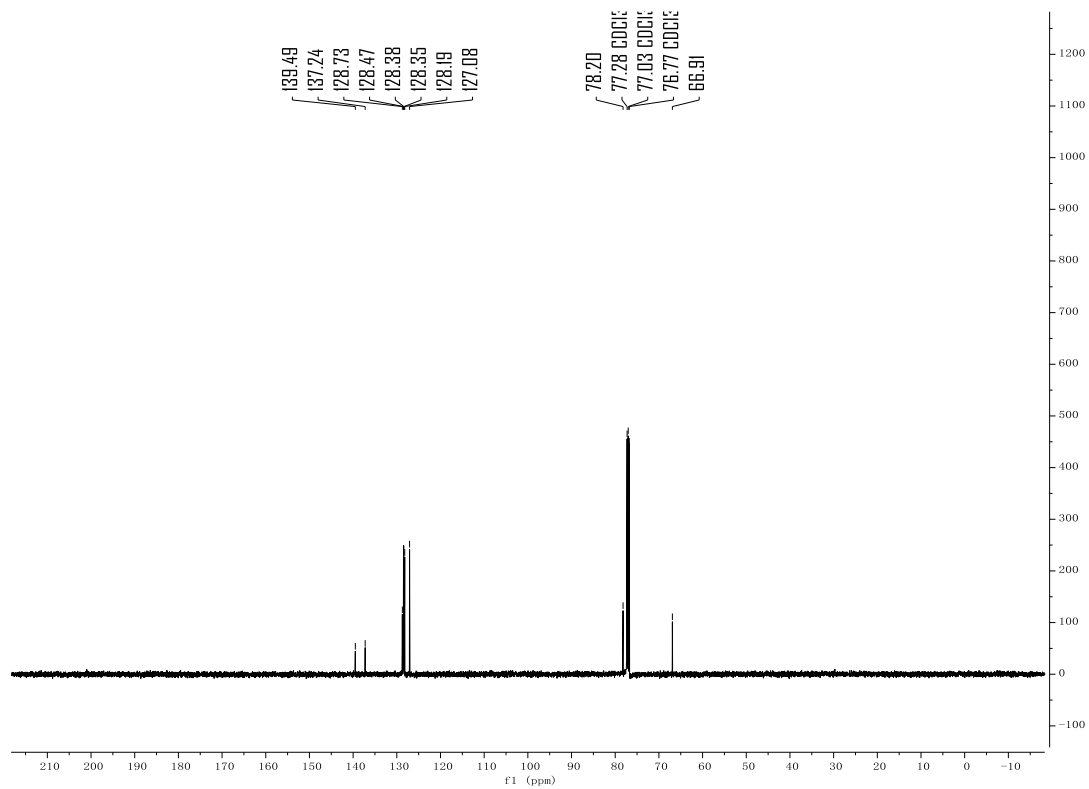

$^{13}\text{C}\{^1\text{H}\}$  NMR (126 MHz, Chloroform-*d*)

*syn*-2-chloro-1,2-diphenylethan-1-ol (**d16'**)

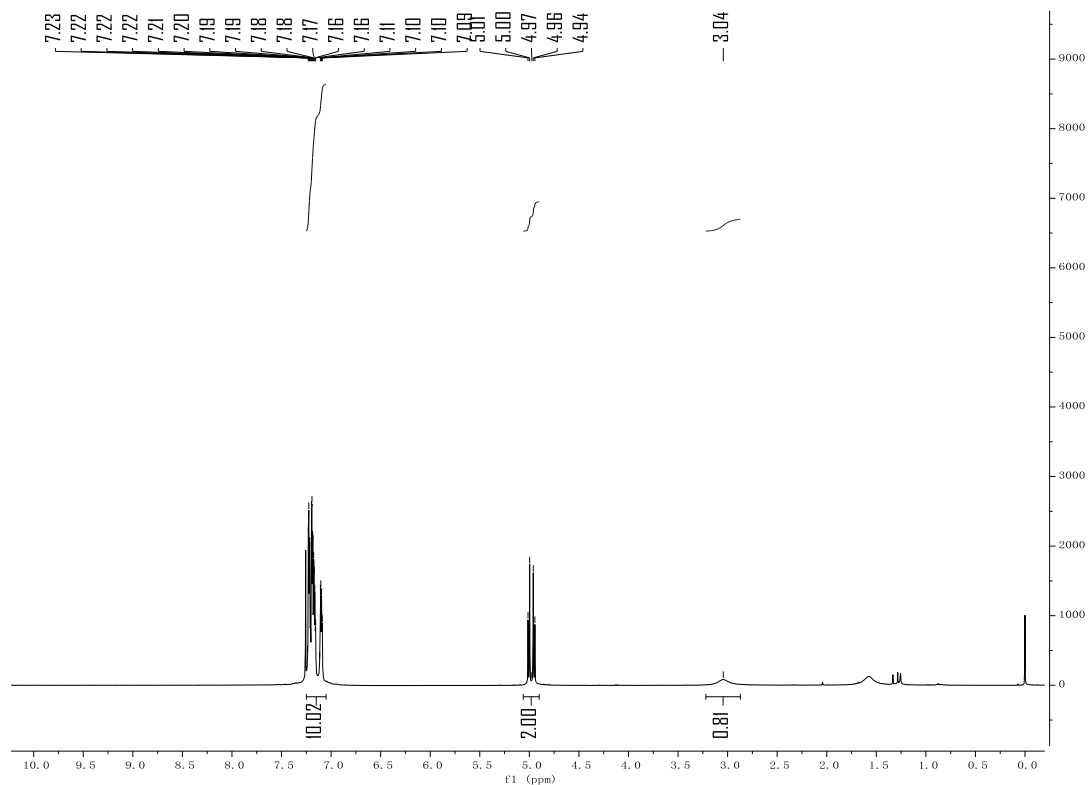

$^1\text{H}$  NMR (500 MHz, Chloroform-*d*)

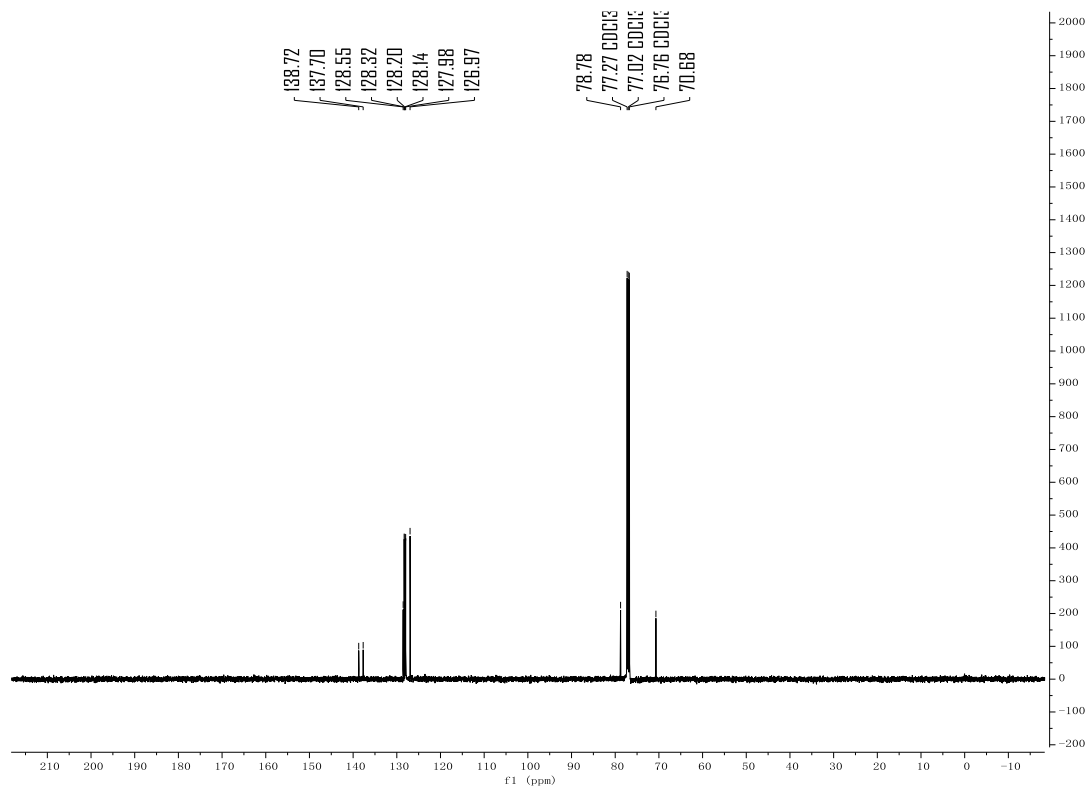

$^{13}\text{C}\{^1\text{H}\}$  NMR (126 MHz, Chloroform-*d*)

2,2-dichloro-1-(2-chlorophenyl)ethan-1-ol (**b12'**)

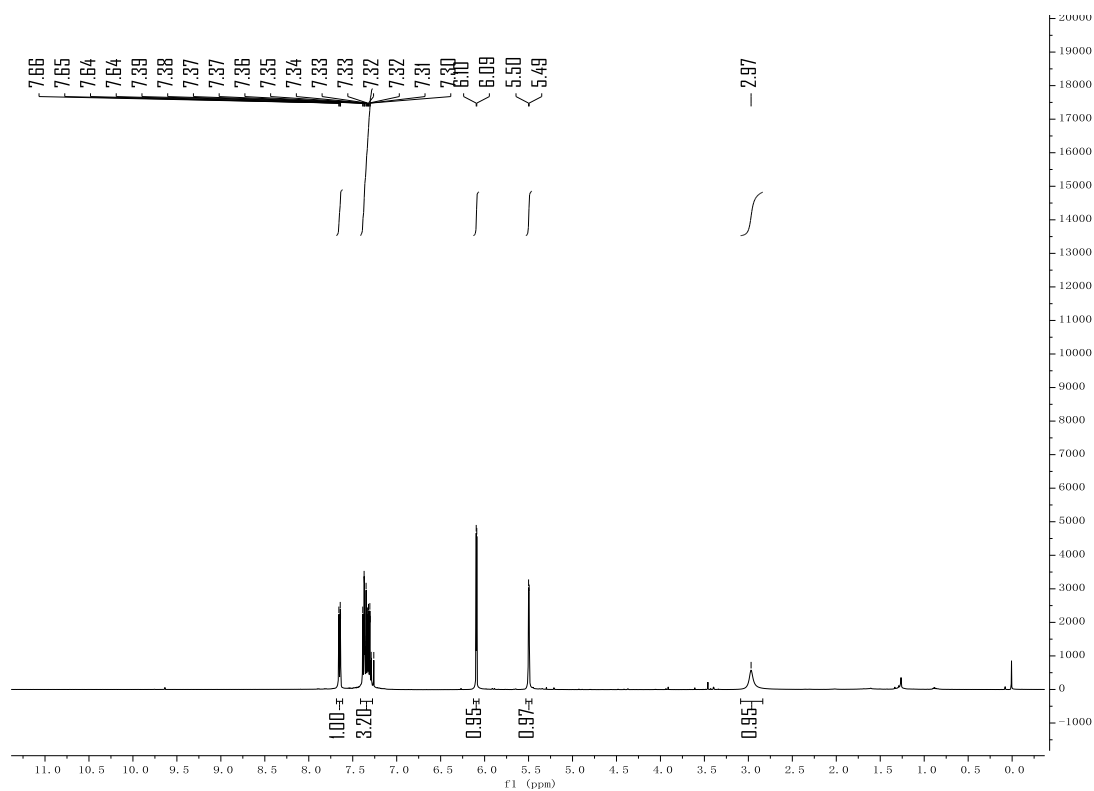

$^1\text{H}$  NMR (500 MHz, Chloroform-*d*)

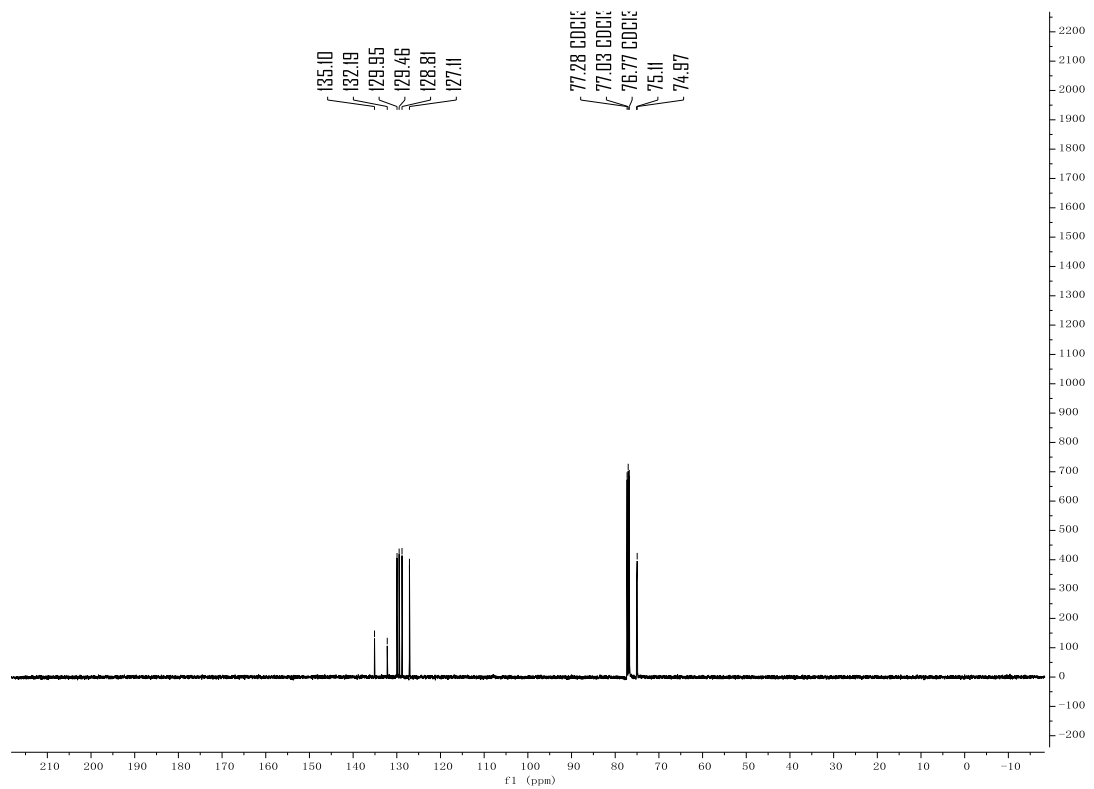

$^{13}\text{C}\{^1\text{H}\}$  NMR (126 MHz, Chloroform-*d*)

1-chloro-2-(2,2-dichloro-1-(4-chlorophenyl)ethyl)benzene (**b12''**)

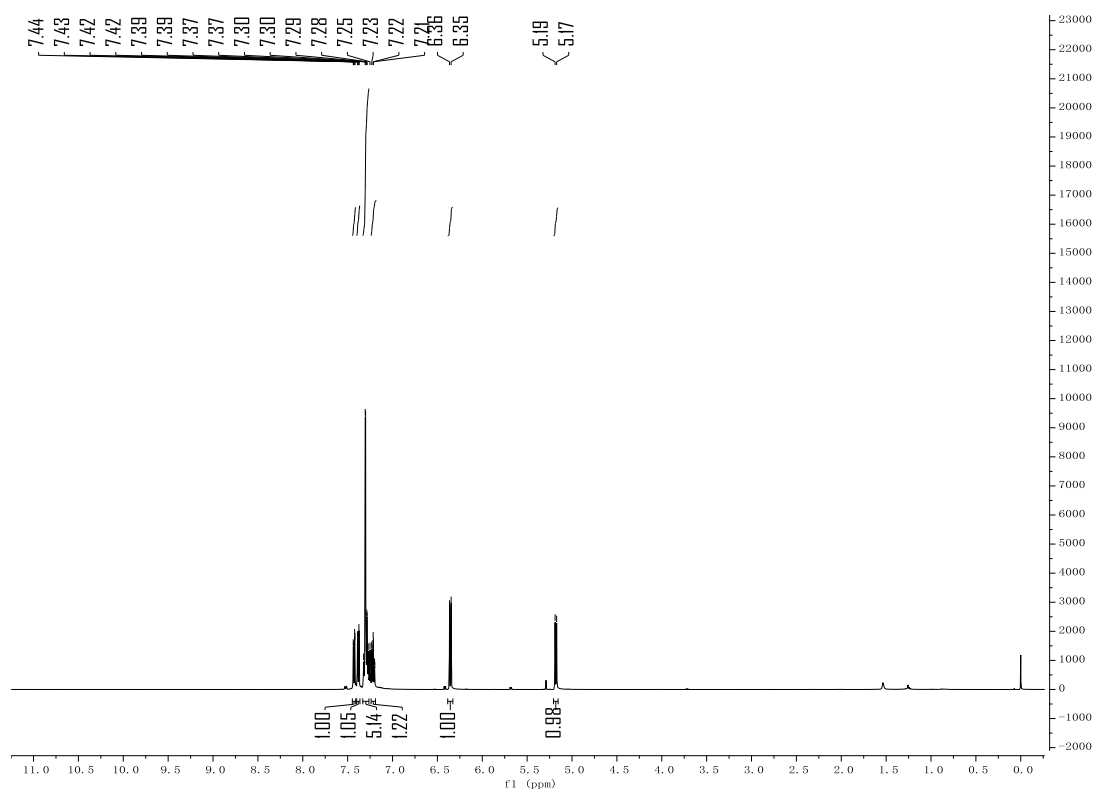

<sup>1</sup>H NMR (500 MHz, Chloroform-*d*)

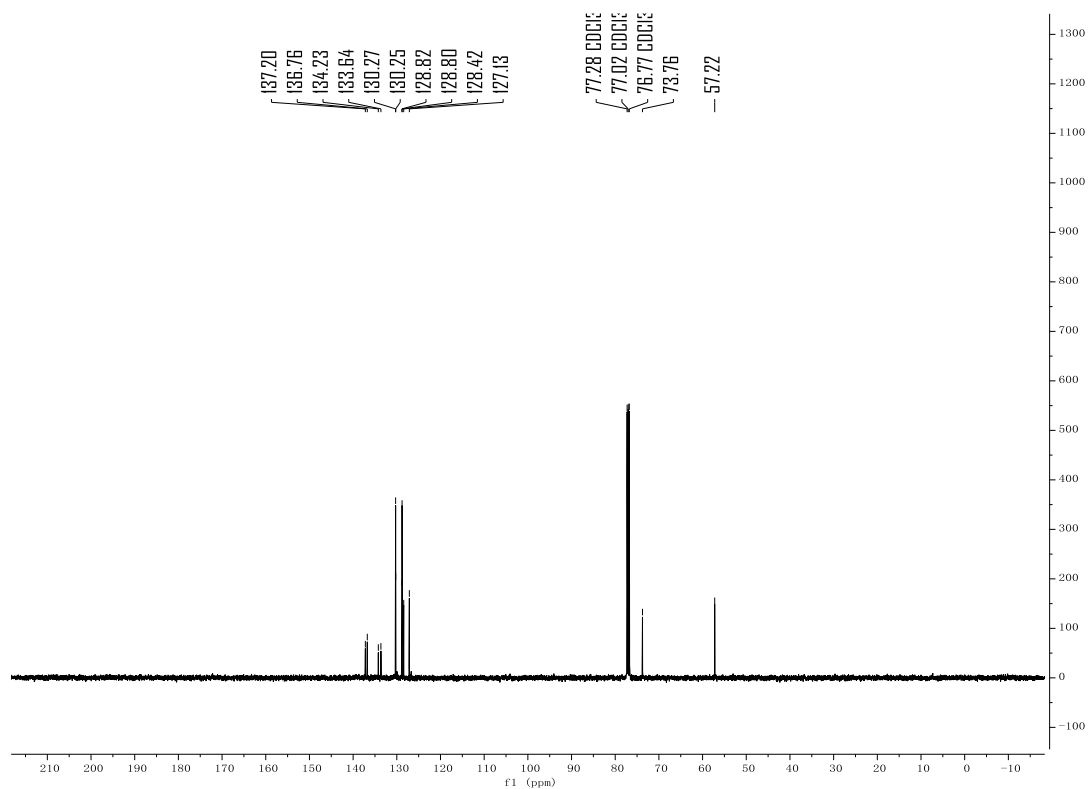

<sup>13</sup>C{<sup>1</sup>H} NMR (126 MHz, Chloroform-*d*)

2,2-dichloro-1-(2-fluorophenyl)ethan-1-one (**b28**)

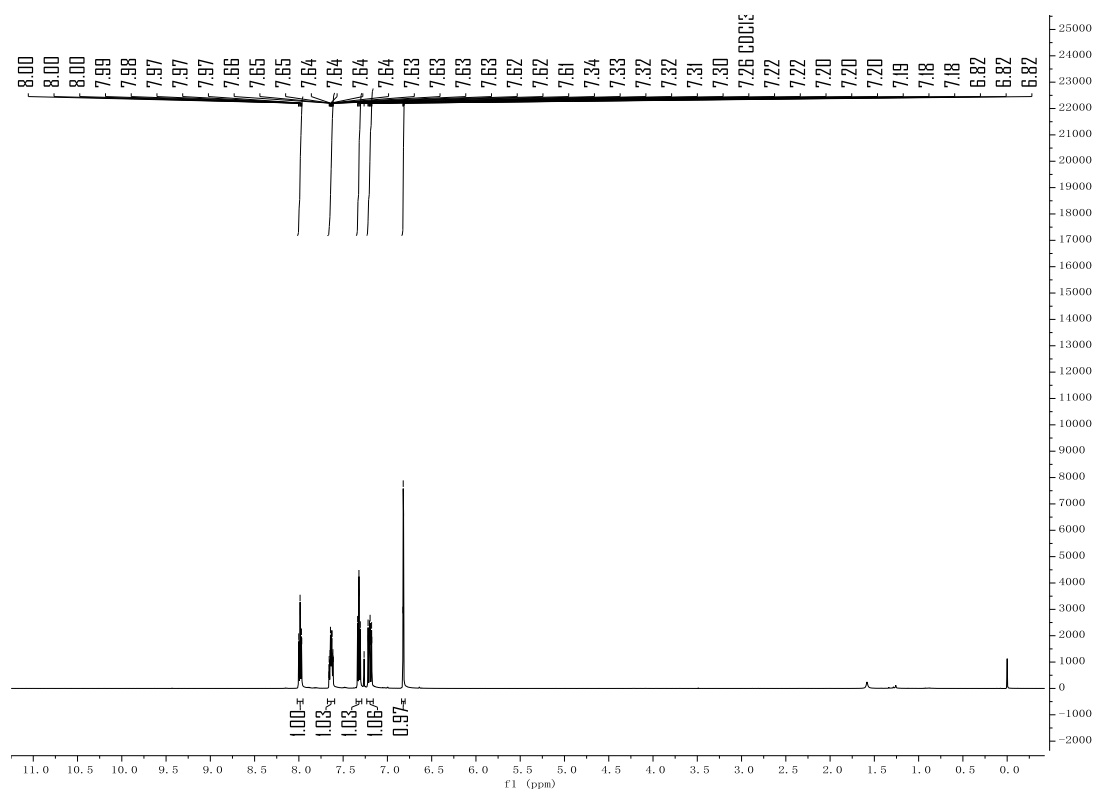

$^1\text{H NMR}$  (500 MHz, Chloroform-*d*)

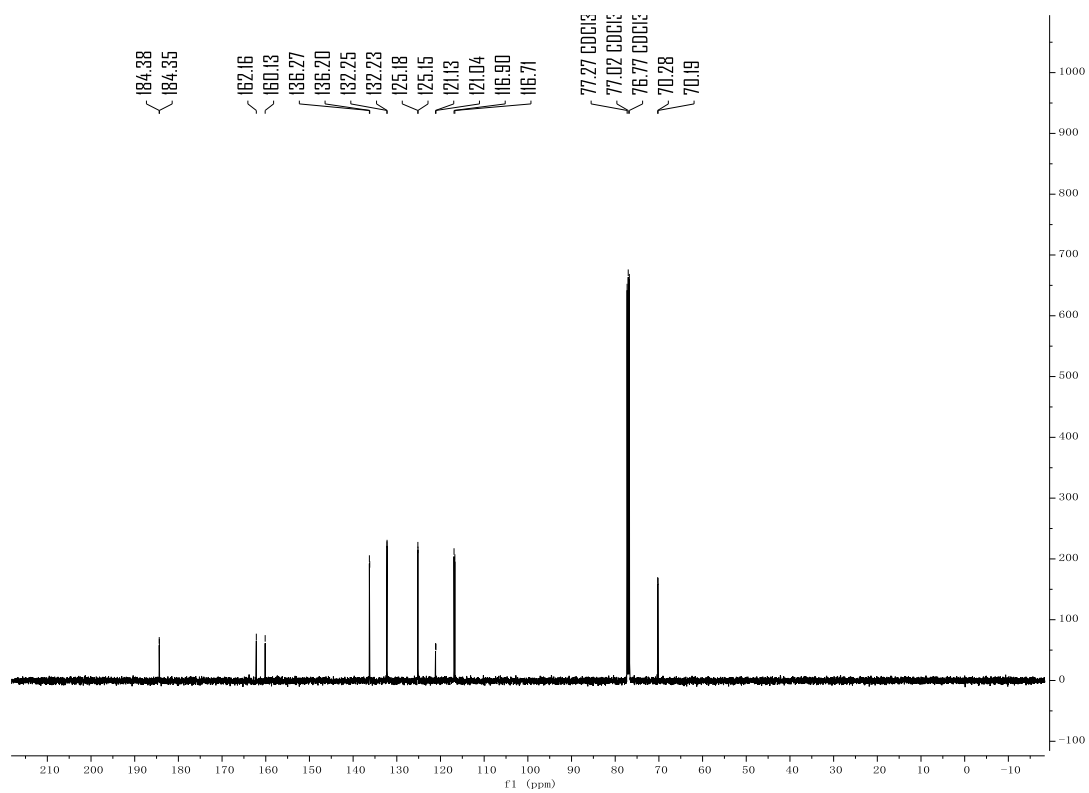

$^{13}\text{C NMR}$  (126 MHz, Chloroform-*d*)



1-(2,2-dichloro-1-(4-chlorophenyl)ethyl)-2-fluorobenzene (**b28''**)

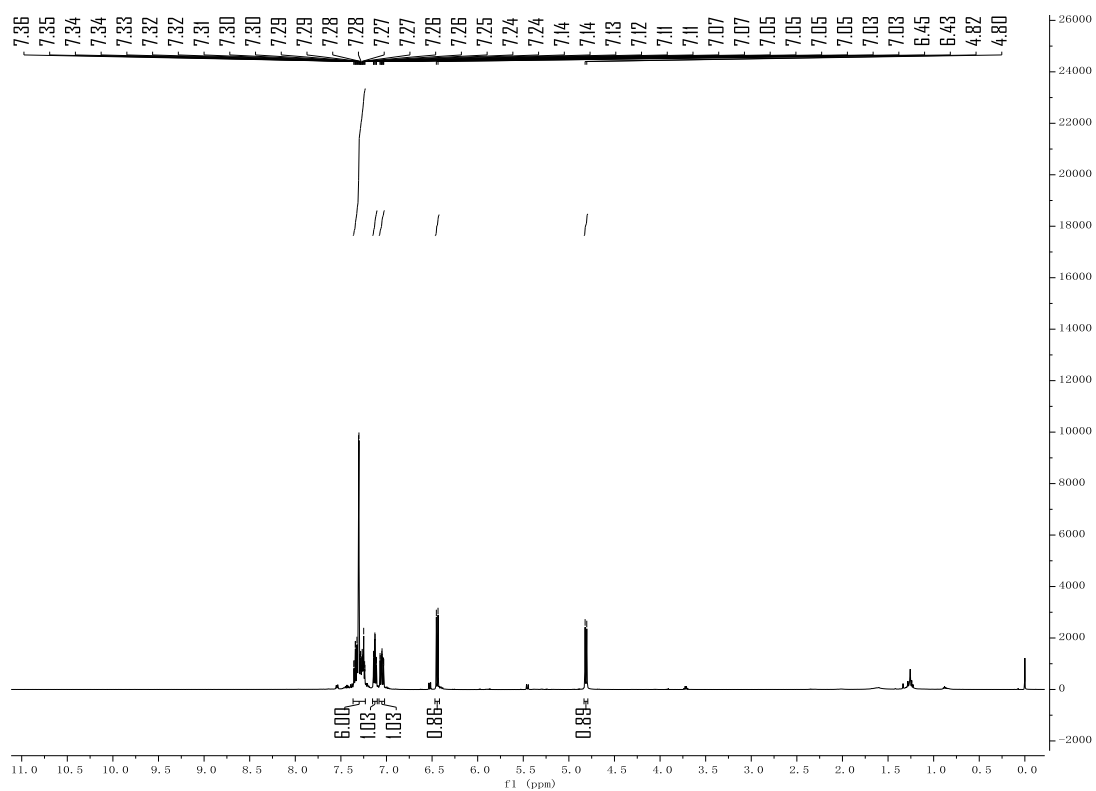

<sup>1</sup>H NMR (500 MHz, Chloroform-*d*)

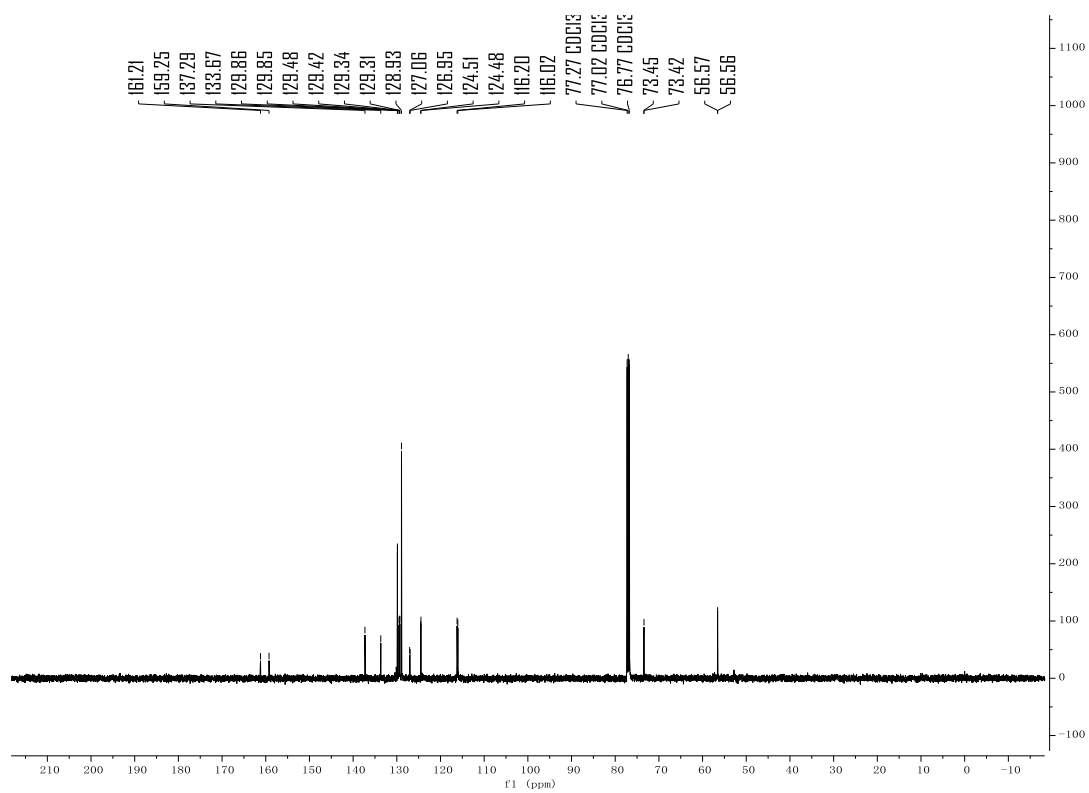

<sup>13</sup>C NMR (126 MHz, Chloroform-*d*)



2-(2-bromo-4-nitro-1H-imidazol-1-yl)-1-phenylethan-1-ol (**d2'**)

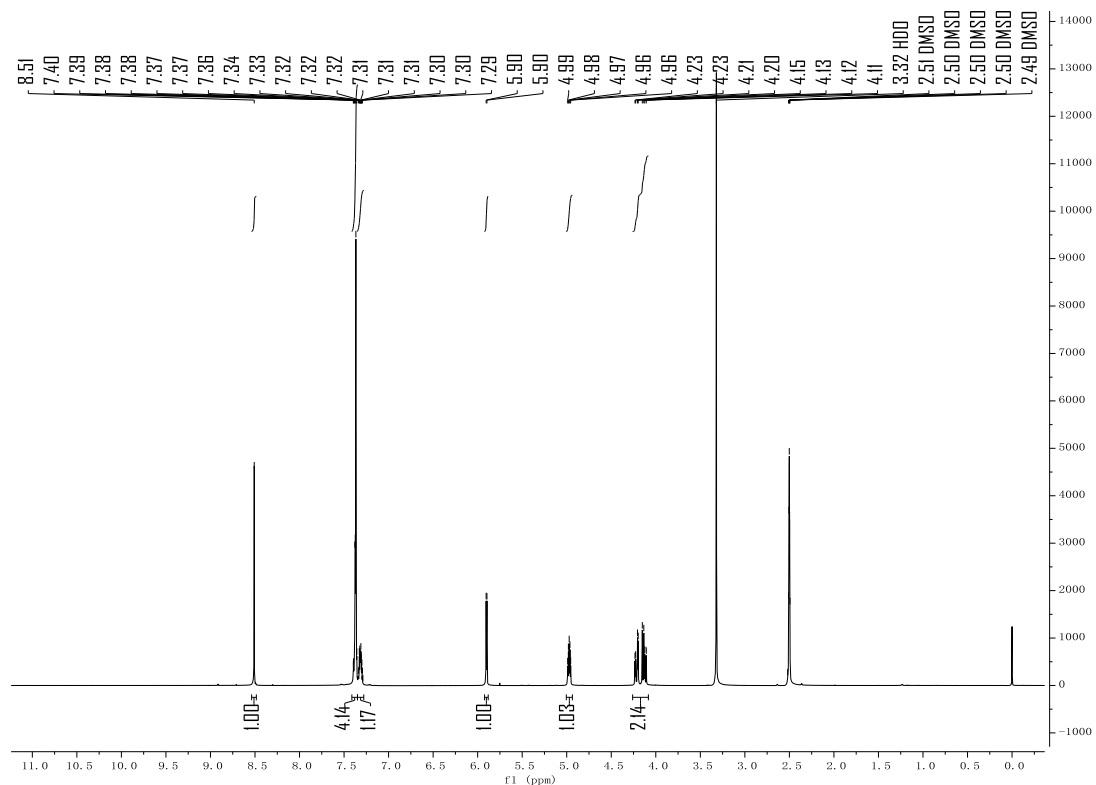

<sup>1</sup>H NMR (500 MHz, DMSO-*d*<sub>6</sub>)

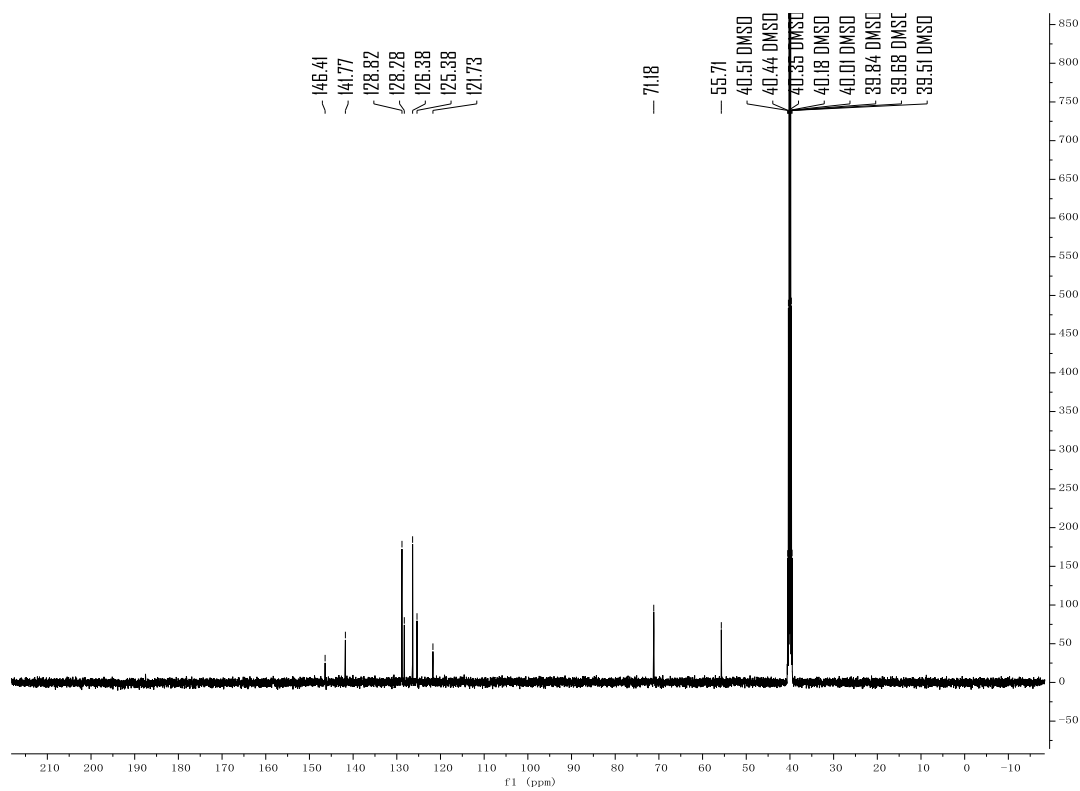

<sup>13</sup>C NMR (126 MHz, DMSO-*d*<sub>6</sub>)

2-(2-methoxy-4-nitro-1H-imidazol-1-yl)-1-phenylethan-1-ol (**d2**)

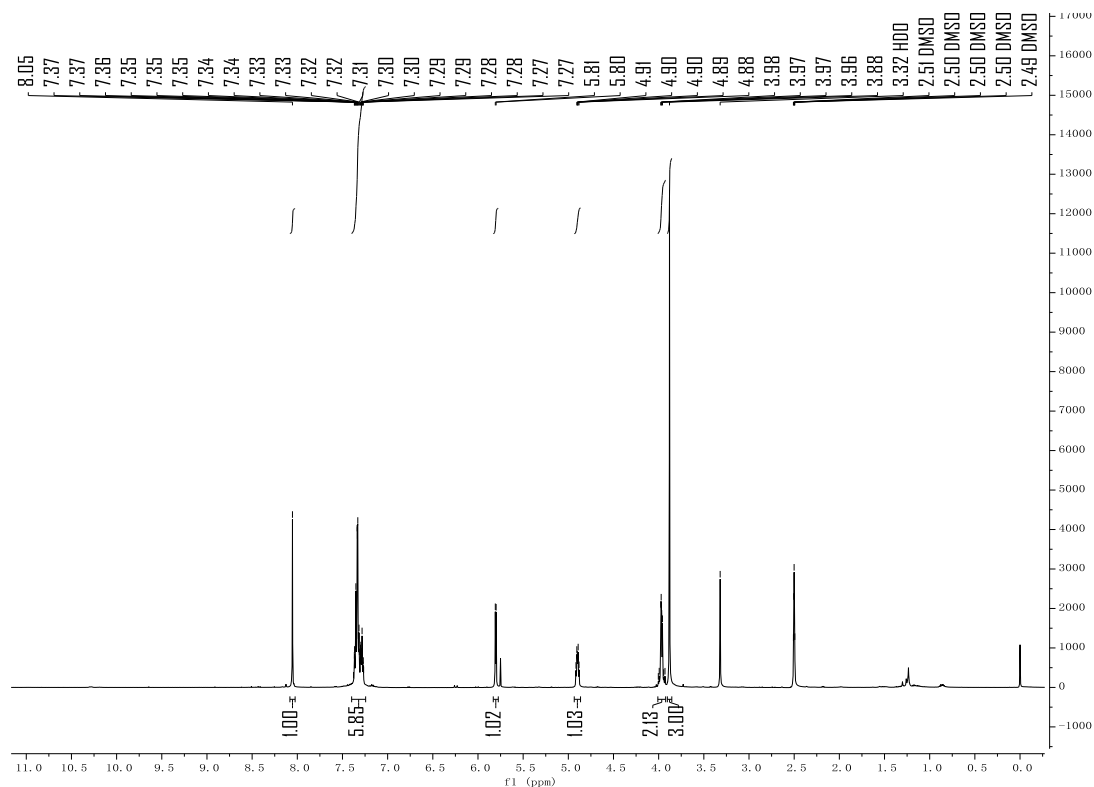

<sup>1</sup>H NMR (500 MHz, DMSO-*d*<sub>6</sub>)

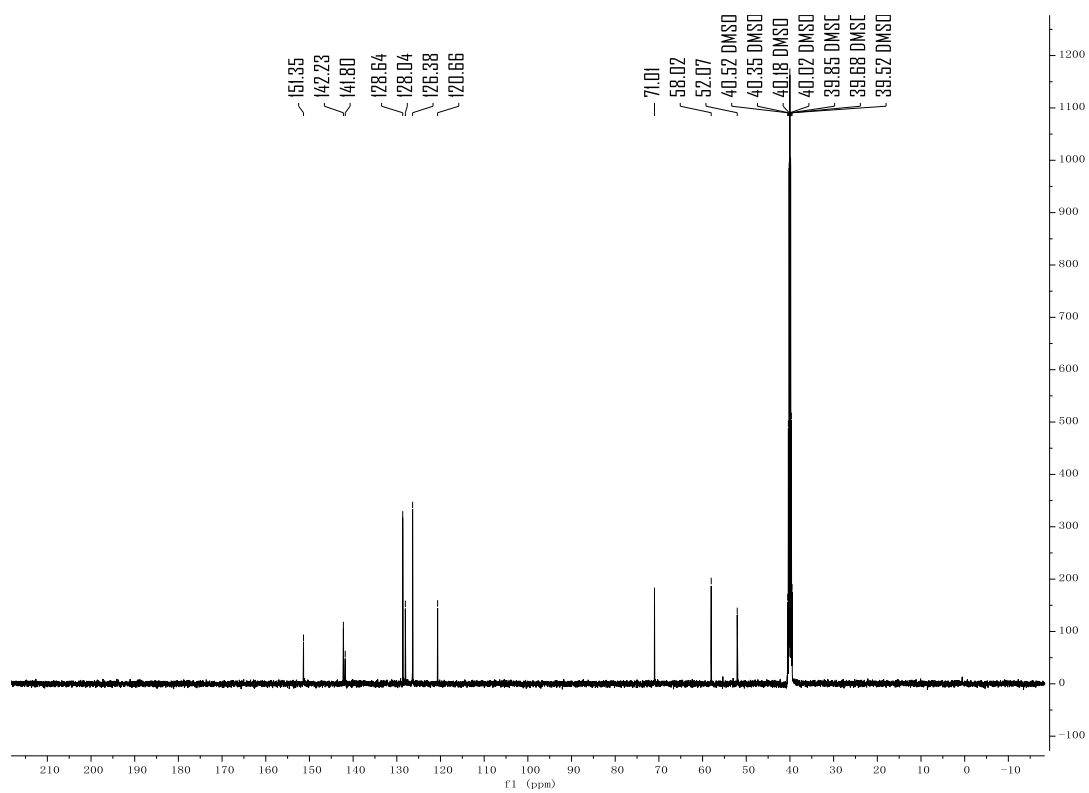

<sup>13</sup>C NMR (126 MHz, DMSO-*d*<sub>6</sub>)

## 6. References

- 1) X. Zhang, Y. Wu, Y. Zhang, H. Liu, Z. Xie, S. Fu, F. Liu, *Tetrahedron* **2017**, *73*, 4513–4518.
- 2) Y. Li, T. Mou, L. Lu, X. Jiang, *Chem. Commun.* **2019**, *55*, 14299–14302.
- 3) V. P. Charpe, M. Gupta, K. C. Hwang, *ChemSusChem* **2022**, *15*, e202200957.
- 4) Z. Zhang, J. Yang, K. Wu, R. Yu, J. Bu, Z. Huang, S. Li, X. Ma, *Tetrahedron Lett.* **2022**, *88*, 153575.
- 5) E. Cho, M. Kim, A. Jayaraman, J. Kim, S. Lee, *Eur. J. Org. Chem.* **2018**, 781–784.
- 6) G. Choi, H. E. Kim, S. Hwang, H. Jang, W.-J. Chung, *Org. Lett.* **2020**, *22*, 4190–4195.
- 7) N. Chaisan, S. Ruengsangtongkul, C. Thongsornkleeb, J. Tummatorn, S. Ruchirawat, *Synlett* **2022**, *33*, 1426–1430.
- 8) Z. Li, Q. Sun, P. Qian, K. Hu, Z. Zha, Z. Wang, *Chin. Chem. Lett.* **2020**, *31*, 1855–1858.
- 9) G. A. Hiegel, C. D. Bayne, B. Ridley, *Synth. Commun.* **2003**, *33*, 1997–2002.
- 10) P. Swamy, M. A. Kumar, M. M. Reddy, M. Naresh, K. Srujana, N. Narender, *RSC Adv.* **2014**, *4*, 26288–26294.
- 11) C. Yin, W. Wu, Y. Hu, X. Tan, C. You, Y. Liu, Z. Chen, X.-Q. Dong, X. Zhang, *Adv. Synth. Catal.* **2018**, *360*, 2119–2124.
- 12) T. von Keutz, D. Cantillo, C. O. Kappe, *Org. Lett.* **2020**, *22*, 7537–7541.
- 13) C. K. Blasius, V. Vasilenko, L. H. Gade, *Angew. Chem. Int. Ed.* **2018**, *57*, 10231–10235.
- 14) M. G. Perrone, E. Santandrea, E. Giorgio, L. Bleve, A. Scilimati, P. Tortorella, *Bioorg. Med. Chem.* **2006**, *14*, 1207–1214.
- 15) L. Ielo, M. Miele, V. Pillari, R. Senatore, S. Mirabile, R. Gitto, W. Holzer, A. R. Alcántara, V. Pace, *Org. Biomol. Chem.* **2021**, *19*, 2038–2043.
- 16) J. Muzart, A. Riahi, *J. Organomet. Chem.* **1992**, *433*, 323–336.
- 17) S.-H. Lee, S. Kim, M.-H. Yun, Y. S. Lee, S.-N. Cho, T. Oh, P. Kim, *Bioorg. Med. Chem. Lett.* **2011**, *21*, 1515–1518.
